# Supplementary material for: Spatial distribution and determinant factors of anaemia among women of reproductive age in Ethiopia: a multilevel and spatial analysis
Source: PubMed Central journal article supplement — BMJ Open. 2019 Apr 4;9(4):e027276. doi: 10.1136/bmjopen-2018-027276 (PMC6500301; doi:10.1136/bmjopen-2018-027276), 2019-04-04
Supplement: bmjopen-2018-027276.draft_revisions.pdf [file bmjopen-2018-027276.draft_revisions.pdf]

# BMJ Open

BMJ Open is committed to open peer review. As part of this commitment we make the peer review history of every article we publish publicly available.

When an article is published we post the peer reviewers' comments and the authors' responses online. We also post the versions of the paper that were used during peer review. These are the versions that the peer review comments apply to.

The versions of the paper that follow are the versions that were submitted during the peer review process. They are not the versions of record or the final published versions. They should not be cited or distributed as the published version of this manuscript.

BMJ Open is an open access journal and the full, final, typeset and author-corrected version of record of the manuscript is available on our site with no access controls, subscription charges or pay-per-view fees (<http://bmjopen.bmj.com>).

If you have any questions on BMJ Open's open peer review process please email [info.bmjopen@bmj.com](mailto:info.bmjopen@bmj.com)

# BMJ Open

## The Spatial Distribution and Determinant Factors of Maternal Anemia in Ethiopia: A Multilevel and Spatial Analysis

|                               |                                                                                                                                                                                                                                                                                                                                                                                                                                                                                                                              |
|-------------------------------|------------------------------------------------------------------------------------------------------------------------------------------------------------------------------------------------------------------------------------------------------------------------------------------------------------------------------------------------------------------------------------------------------------------------------------------------------------------------------------------------------------------------------|
| Journal:                      | <i>BMJ Open</i>                                                                                                                                                                                                                                                                                                                                                                                                                                                                                                              |
| Manuscript ID                 | bmjopen-2018-027276                                                                                                                                                                                                                                                                                                                                                                                                                                                                                                          |
| Article Type:                 | Research                                                                                                                                                                                                                                                                                                                                                                                                                                                                                                                     |
| Date Submitted by the Author: | 16-Oct-2018                                                                                                                                                                                                                                                                                                                                                                                                                                                                                                                  |
| Complete List of Authors:     | Kibret, Kelemu; University of Newcastle, Priority Research Center for Generational Health and Aging, School of Medicine & Public Health Chojenta, Catherine; The University of Newcastle Australia, Priority Research Centre for Generational Health and Ageing, School of Medicine and Public Health<br>Gresham, Eliie; Western New South Wales Local Health District, Health Intelligence Unit<br>Loxton, Deborah; University of Newcastle, Research Centre for Gender Health & Ageing, School of Medicine & Public Health |
| Keywords:                     | Anemia, spatial analysis, multilevel analysis, reproductive age women, women                                                                                                                                                                                                                                                                                                                                                                                                                                                 |
|                               |                                                                                                                                                                                                                                                                                                                                                                                                                                                                                                                              |

SCHOLARONE™  
Manuscripts

1  
2  
3 **The Spatial Distribution and Determinant Factors of Maternal Anemia in Ethiopia: A**  
4 **Multilevel and Spatial Analysis**

5  
6 Kelemu Tilahun Kibret<sup>1\*</sup>, Catherine Chojenta<sup>1</sup>, Ellie Gresham<sup>2</sup>, Deborah Loxton<sup>1</sup>  
7

8  
9 <sup>1</sup>Priority Research Centre for Generational Health and Ageing, School of Medicine and Public  
10 Health, University of Newcastle, Australia.  
11

12 <sup>2</sup>Health Intelligence Unit, Western NSW Local Health District, Australia

13 \*Corresponding author: Kelemu Tilahun email [ktwu27@gmail.com](mailto:ktwu27@gmail.com) phone +61415649254  
14  
15  
16  
17  
18  
19  
20  
21  
22  
23  
24  
25  
26  
27  
28  
29  
30  
31  
32  
33  
34  
35  
36  
37  
38  
39  
40  
41  
42  
43  
44  
45  
46  
47  
48  
49  
50  
51  
52  
53  
54  
55  
56  
57  
58  
59  
60

For peer review only

## Abstract

**Objective:** The aim of this study was to assess the spatial distribution and determinant factors of anemia among reproductive age women in Ethiopia.

**Methods:** An in depth analysis of the 2016 Ethiopian Demographic and Health Survey data was undertaken. Getis-Ord  $G_i^*$  statistics were used to identify the hot and cold spot areas for maternal anemia. A multilevel logistic regression model was used to identify independent predictors of maternal anemia.

**Results:** Women who were older (adjusted odd ratio (AOR) = 0.75; 0.64, 0.96), with no education (AOR = 1.37; 95 % CI: 1.102–1.72), living in a rural area (AOR=1.29; 95%CI: 1.02, 1.63), lowest wealth quantile (AOR = 1.29; 95 % CI: 1.014-1.60), currently pregnant (AOR=1.28; 95% CI: 1.10, 1.51, currently breastfeeding (AOR =1.09; 95% CI: 1.025, 1.28), with high gravidity (AOR=1.39; 95% CI: 1.13, 1.69), availability of unimproved latrine facilities (AOR = 1.18; 95 % CI: 1.01, 1.39), and HIV positive (AOR= 2.11; 95% CI: 1.59, 2.79) were more likely to have anemia. The spatial analysis indicated that statistically high hotspots of anemia were observed in the eastern (Somali, Dire Dawa and Harari regions) and north-eastern (Afar) parts of the country.

**Conclusion:** Maternal anemia is not randomly distributed across the country. Significantly high spots /prevalence of anemia was observed in the eastern and north eastern parts of Ethiopia. Anemia prevention strategies need to be targeted on rural residency, women with limited to no education, women who are breastfeeding, areas with poor latrine facilities and women who are HIV positive.

Key words: Anemia, spatial analysis, multilevel analysis, reproductive age women, women

## Article Summary

### Article focus

- Anemia is a major public health problem of women and nearly a quarter of reproductive women were anemic in Ethiopia.
- Maternal anemia prevalence rates is varied with different factors across different parts of the country while spatial analyses have not been conducted to identify hot spot areas of maternal anemia in Ethiopia.

### Key messages

- Considerable geographic disparities of maternal anemia prevalence rate occurs inside Ethiopia

- 1  
2  
3 ➤ Maternal anemia was non-random across the country, where significantly high spots of anemia  
4 was observed in the eastern and north eastern part of the country  
5  
6 ➤ The occurrence of maternal anemia was associated with rural residence, having no formal  
7 education, poorest wealth index, being currently pregnant and breastfeeding, higher gravidity  
8 of women, lack of clean water source, and access to an unimproved toilet facility  
9  
10 ➤ The prevention of maternal anemia needs multifaceted intervention approaches like for  
11 instance improving economic status of women and teaching women, and improving  
12 availability of clean water and toilet facilities  
13  
14  
15  
16

### 17 **Strength and limitation of this study**

- 18 ➤ Used large population based data with a large sample size, which is representative to all regions  
19 of the country  
20  
21 ➤ A combination of statistical methods (spatial analysis and multilevel logistics analysis) were  
22 applied which allows to understand the role of contextual and geographical factors for the  
23 occurrence of anemia among women of reproductive age  
24  
25 ➤ The cause effect and temporal relationship could not be established due to cross sectional  
26 nature of the data  
27  
28 ➤ Unable to incorporate essential factors such as dietary intake and behavioral factors in the  
29 analysis  
30  
31  
32  
33  
34  
35  
36  
37  
38  
39  
40  
41  
42  
43  
44  
45  
46  
47  
48  
49  
50  
51  
52  
53  
54  
55  
56  
57  
58  
59  
60

## Introduction

Anemia refers to a low hemoglobin level (<11mg/dl for pregnant women and <12mg/dl for non-pregnant women) [1]. If an individual's hemoglobin level is low, the red blood cells are unable to carry adequate oxygen for the body's physiologic needs [1]. Anemia is a major public health problem in women and children aged under five [2]. Worldwide, 38% of pregnant women, and 29% of non-pregnant women were anemic in 2011 [2]. Pregnant women in low and middle income countries (LMIC) experience high rates of anemia, in which the highest prevalence rates are reported in Central and West Africa (56%), South Asia (52%) and East Africa (36%) [2]. Similarly, a large proportion of non-pregnant women were reportedly anemic in West and Central Africa (48%), South Asia (47%) and East Africa (28%) [2]. Thus, anaemia remains as one of the priority areas at the global level particularly in resource-limited settings [3]. Reducing anemia is taken as an essential part to improving the health of women, and the world health organization (WHO) set a global target of 50% reduction of anemia among women of reproductive age by 2025 [4].

Anemia is a common problem in Ethiopia. The recent Ethiopian Demographic Health Survey (EDHS 2016) reported a 29% prevalence of anemia among pregnant women and 24% among reproductive age women ranging from 16% to 59% across different parts of the country [5]. Likewise, a number of pocket studies from different parts of the country reported varied prevalence rates of anemia among pregnant women ranging from as low as 17% in the north [6], 32% in the south [7] and up to 44% [8] and 57% [9] in eastern Ethiopia. Similarly, different studies reported a 16% [10] prevalence of anemia among non-pregnant women and 29% [11] and 30% [12, 13] among women of reproductive age.

The main cause of anemia is iron deficiency [14], however, deficiencies of other micronutrients (vitamin A, vitamin B12, and folate), chronic bleeding, acute or chronic infections and parasitic infections (hookworm and malaria) are also known to cause anemia [10, 15-17]. Based on the geographic and disease situation in LMIC, about half of anemia cases are attributable to a deficiency of iron and the remainder may be due to diseases like parasitic infections, malaria and human immune deficiency virus (HIV) [18]. A systematic review revealed that the percentage of anemia due to iron deficiency was below 50% in LMIC with regional variations and poor sanitary conditions and subsequent increased occurrence of infections also leading to anemia [19].

1  
2  
3 In Ethiopia, varied prevalence rates of maternal anemia have been observed with different factors  
4 across different parts of the country [6, 9]. For instance, large family size, low education status,  
5 rural residence, hookworm infestation and HIV infection were identified as factors of anemia in  
6 northern Ethiopia [6, 20], while studies from the eastern area reported that multigravidas, third  
7 trimester of pregnancy and intestinal infestation were factors of anemia during pregnancy [8, 21].  
8 The variation in rates of anemia among women in Ethiopia might be due to the presence of diverse  
9 contextual and geographically variable factors including diet and the incidence of communicable  
10 diseases [3].  
11

12 To date, spatial analyses have not been conducted to identify hot spot areas of maternal anemia in  
13 Ethiopia. Assessing the geographic distributions of anemia and the impact of risk factors on the  
14 disease prevalence by area is important to prioritize and design targeted prevention and  
15 intervention programmes to address maternal anemia [22]. Mapping the geographical distribution  
16 of anemia can also be beneficial for prevention and control of parasitic infections like soil  
17 transmitted-helminthiasis, schistosomiasis and malaria; because the control programmes for soil  
18 transmitted-helminthiasis and malaria have been evaluated using the burden of anemia as a  
19 quantifiable indicator [23].  
20

21 Thus, the aims of this study was to assess the spatial distribution and determinant factors of anemia  
22 among women of reproductive age women in Ethiopia.  
23

## 24 **Methods**

### 25 **Patient and Public Involvement**

26 As this study used the publicly available data set, the patients and or public were not  
27 involved.  
28

### 29 **Study design and setting**

30 An in depth analysis of the EDHS 2016 data was undertaken for this study. EDHS 2016 is the  
31 fourth national survey conducted in all parts of Ethiopia (in nine regional states (Tigray, Afar,  
32 Amhara, Oromia, Somali, Benishangul-Gumuz, Southern Nations, Nationalities and Peoples  
33 (SNNP), Gambella and Harari) and two city administrations (Addis Ababa and Dire Dawa)) [5].  
34 In Ethiopia the states are administratively further subdivided into *Zones*, *Zones* into *Woredas* and  
35 *Woredas* further into the lowest unit called *Kebeles*.  
36

### Sampling and data measurements

In the 2016 EDHS, stratified and cluster multistage sampling was used and intended to have appropriate demographic and health indicators at nationwide as well as at nine regional states and two city administrations. In the first stage, 645 clusters of enumeration areas (EAs) (202 urban and 443 rural) were identified using probability proportional to the size of EAs. At the second stage, the households were listed in all the selected EAs from September to December 2015 and then a random sample of 18,008 households were selected. Of this, 16,650 were successfully interviewed, resulting in a response rate of 98%. In the interviewed households, 16,583 eligible women were identified for individual interviews. A total of 15,683 women aged 15-49 years were interviewed and haemoglobin levels were measured for 14,923 of them [5]. Data collection took place from January 18, 2016, to June 27, 2016.

The sample size for EDHS was determined based on the multistage sampling procedure and taking into consideration the sampling variation. Standard errors were computed using the Taylor linearization method. The design effect, which is the ratio between the standard error with the given sample design and the standard error that would result if a simple random sample had been used, was determined. The value of the design effect, averaged over all variables, is 1.99. This means that because of multi-stage clustering of the sample, the average standard error is increased by a factor of 1.99 beyond that in an equivalent simple random sample.

Haemoglobin levels of the women were measured using HemoCue and all haemoglobin values were adjusted for both altitude and smoking status. The pregnant women with a haemoglobin value <11g/dl and non-pregnant women with <12g/dl were considered anaemic [1]. Similarly, anemia was classified according to its severity as severe (hemoglobin value < 7 g/dl), moderate (7.0-9.9 g/dl) in all women and mild (10.0 – 10.9 g/dl) in pregnant women and (10.0 – 11.9 g/dl) in non-pregnant women [1].

### Explanatory variables

Both individual and community level explanatory factors were used. The individual and community level factors included in this study are presented in Table 1 with their definition and coding. Individual factors included age, religion, marital status, educational status, BMI, birth interval, use of contraceptive, wealth index, family size, iron-folate intake and gravidity of women, while the community level factors were residence (urban, rural), regions, water source and latrine



1  
2  
3 facility type. Community level measures could also be driven by aggregating women level  
4 variables. For example, the proportion of women in the community who are in the top quantile of  
5 wealth index and proportion of women in the community who have clean water access.  
6  
7 Community level factors would describe the group of populations existing in similar living  
8  
9 settings.  
10  
11  
12  
13  
14  
15  
16

17 Table 1 Variables identified for this study with coding  
18  
19  
20

| Variable                   | Categories                                                                                                                                                                                                                            |
|----------------------------|---------------------------------------------------------------------------------------------------------------------------------------------------------------------------------------------------------------------------------------|
| Age (Age in 5-year groups) | 1=15-19; 2=20-29; 3=30-39; 4=40-49                                                                                                                                                                                                    |
| Region                     | 1=Tigray; 2=Afar; 3=Amhara; 4= Oromia; 5=Somali;<br>6=Benishangul-Gumuz; 7=SNNNP; 8=Gambella; 9=Harari;<br>10=Addis Ababa; 11=Dire Dawa                                                                                               |
| Area of residence          | 1=Urban; 2=Rural                                                                                                                                                                                                                      |
| Education level            | 1=No Education; 2= Primary; 3=Secondary; 4=Higher                                                                                                                                                                                     |
| Source of drinking water   | 1=piped water; 2=other improved (public taps, standpipes, tube wells, boreholes, protected dug wells and springs, and rainwater, bottled water); 3=unimproved (river, pond, unprotected spring and well)                              |
| Type of toilet facility    | 1= Improved (flush/pour flush toilets to piped sewer systems, septic tanks, and pit latrines; ventilated improved pit (VIP) latrines; pit latrines with slabs; and composting toilets);<br>2=Unimproved; 3=Open defecation; 4= Others |
| Religion                   | 1=Orthodox; 2=Protestant; 3=Muslim; 4= Others (Catholic, traditional, other)                                                                                                                                                          |
| Ethnicity                  | 1=Amhara; 2= Oromo; 3= Tigray; 4= Somali; 5= Sidama;<br>6=Gurage; 7=Welayta; 8=Hadya; 9=Other                                                                                                                                         |
| Wealth index               | 1=Poorest; 2=Poorer; 3=Middle; 4=Richer; 5=Richest                                                                                                                                                                                    |

|    |                                        |                                                             |
|----|----------------------------------------|-------------------------------------------------------------|
| 1  |                                        |                                                             |
| 2  |                                        |                                                             |
| 3  | Preceding birth interval (months)      | 1= <24 Months; 2= ≥24 Months                                |
| 4  | (for index child- for youngest         |                                                             |
| 5  | child) except the first birth, no      |                                                             |
| 6  | interval for 1st birth                 |                                                             |
| 7  |                                        |                                                             |
| 8  |                                        |                                                             |
| 9  |                                        |                                                             |
| 10 | Total children ever born               | 1=0; 2= 1-3; 3= 4+                                          |
| 11 |                                        |                                                             |
| 12 | Births in past year (number of         | 1= 0; 2= 1-2                                                |
| 13 | births in the 12 months (not 0 to      |                                                             |
| 14 | 11) prior to the month of interview)   |                                                             |
| 15 |                                        |                                                             |
| 16 |                                        |                                                             |
| 17 | Currently pregnant                     | 0=No or unsure; 1=Yes                                       |
| 18 |                                        |                                                             |
| 19 | Ever had a terminated pregnancy        | 1= Yes; 2=No                                                |
| 20 | (miscarriage, abortion, or stillbirth) |                                                             |
| 21 |                                        |                                                             |
| 22 | Births in the last three years (0 to   | 1= Yes; 2= No                                               |
| 23 | 35 prior to the month of interview)    |                                                             |
| 24 |                                        |                                                             |
| 25 | Current contraceptive use              | 1= Yes; 2 = No                                              |
| 26 |                                        |                                                             |
| 27 | Hemoglobin level adjusted for          | (g/dl - 1 decimal)                                          |
| 28 | altitude and smoking (g/dl - 1         |                                                             |
| 29 | decimal)                               |                                                             |
| 30 |                                        |                                                             |
| 31 | Anemia                                 | 1=Anemic (Severe (<7 g/dl), Moderate (7-9.9 g/dl), Mild 10- |
| 32 |                                        | 10.9/11.9 g/dl); 2=Non-Anemic                               |
| 33 |                                        |                                                             |
| 34 |                                        |                                                             |
| 35 |                                        |                                                             |
| 36 | BMI                                    | 1=<18.5; 2=18.5-24.9;3=>=25                                 |
| 37 |                                        |                                                             |
| 38 | Smoking                                | 1=Yes; 2=No                                                 |
| 39 |                                        |                                                             |
| 40 | Current marital status                 | 1=Single; 2=Married/Living with partner;                    |
| 41 |                                        | 3=Divorced/Widowed/Separated                                |
| 42 |                                        |                                                             |
| 43 | During pregnancy, given or bought      | 0=No; 1=Yes; 3= I Don't Know                                |
| 44 | iron tablets/syrup for most recent     |                                                             |
| 45 | pregnancy                              |                                                             |
| 46 |                                        |                                                             |
| 47 |                                        |                                                             |
| 48 | Drugs for intestinal parasites during  | 0=No; 1=Yes; 3=I Don't Know                                 |
| 49 | pregnancy                              |                                                             |
| 50 |                                        |                                                             |
| 51 | Currently breastfeeding                | 0=No; 1=Yes                                                 |
| 52 |                                        |                                                             |
| 53 | Respondent's occupation (grouped)      | 1= Working; 2= Not working                                  |
| 54 |                                        |                                                             |
| 55 | Have you ever chewed Chat?             | 0 = No; 1=Yes                                               |
| 56 |                                        |                                                             |
| 57 |                                        |                                                             |
| 58 |                                        |                                                             |
| 59 |                                        |                                                             |
| 60 |                                        |                                                             |

---

|                                                   |                          |
|---------------------------------------------------|--------------------------|
| Have you ever taken a drink that contains alcohol | 0 = No; 1=Yes            |
| HIV test                                          | 1= Positive 2 = Negative |

---

## Data analysis

### Spatial analysis

Spatial analyses were performed using geoda version 1.8.10, QGIS Version 2.18.0 and Arch GIS software version 10.1, and base files of the administrative regions for Ethiopia were obtained from DIVA (diva-gis.org). The spatial analysis was conducted by joining the occurrence of anemia (as proportions) with each cluster to the corresponding geospatial location (survey cluster values). The values of DHS data was merged with the GPS dataset in geoda software and these values were imported into the QGIS software. Anemia proportions were then computed at lower (cluster), Zonal and Regional levels using QGIS.

The spatial pattern of the rate of maternal anemia was visualized and a spatially smoothed proportion was obtained through empirical Bayes estimation methods [24]. The smoothed proportions present clearer patterns, where the problem was most severe. The spatial empirical Bayes "smooth" estimates technique was able to deal with spatial heterogeneity. The estimation technique guarantees that estimates of neighbouring states are more alike than estimates of states that are further away [25].

A standardized prevalence rate (SPR), or, the ratio of the observed prevalence rate to a national prevalence rate was determined using Geoda software [25]. Geoda implements this in the form of an excess risk estimate as part of the map. The excess risk rate is the ratio of the observed rate to the average rate computed for all the data [25].

Furthermore, the spatial analysis was performed to identify the clustering of maternal anemia or hotspot areas (the areas that have higher anemia prevalence rates compared to the national average) in different regions of Ethiopia. Spatial analysis is an epidemiological method useful to specify geographic areas with high or low rate of disease occurrence and its variability over the region or country [26]. Getis-Ord  $G_i^*$  statistics was used for this spatial analysis using ArcGIS version 10.1

1  
2  
3 software. Local Getis-Ord  $G_i^*$  statistics [27] is important to identify the hot and cold spot areas  
4 for maternal anemia using latitude and longitude coordinate readings of geographic poisoning  
5 system (GPS) which was taken at the nearest community centre for EAs or clusters of EDHS 2016  
6 [5].  
7  
8  
9

10 A local Getis-Ord G-statistic tool in ArcGIS was used to calculate the spatial variability of high  
11 and low prevalence rates of maternal anemia. An autocorrelation can be classified into positive  
12 and negative correlation through the Local Getis-Ord G statistics [27]. Positive autocorrelation  
13 occurs when similar values clustered together on a map (high rates surrounded by nearby high  
14 rates or low rates surrounded by nearby low rates). Negative autocorrelation indicates different  
15 values clustered together on a map, that is, high values surrounded by nearby low values or low  
16 values surrounded by nearby high values. Statistical significance of autocorrelation was  
17 determined by z-scores and p-value with a 95 % level of confidence. The distribution and  
18 variations of maternal anemia prevalence rate across the country was displayed on the map.  
19  
20  
21  
22  
23  
24  
25

### 26 **Statistical analysis**

27  
28 The descriptive statistical analysis was performed using SPSS software version 24.0  
29 (www.spss.com). Frequencies, percentage, and standard deviation were used for the descriptive  
30 analysis. Since some regions with small populations were oversampled while others with large  
31 population are underrepresented, the weighted frequencies and percentages (based on population  
32 size of each region) were computed as a correction. The detailed weighting procedure was  
33 described in EDHS 2016 report [5]. The mean and standard deviation were computed for blood  
34 hemoglobin level. The mean hemoglobin value was also compared across different independent  
35 categorical variables using One-way Analysis of Variance (ANOVA) or independent t-test.  
36  
37  
38  
39  
40  
41

42 **Multilevel logistic regression:** The Multivariable multilevel logistic regression model was used  
43 to determine the effect of different factors on maternal anemia. The analysis was performed by  
44 using SAS version 9.4 software (SAS North Carolina State University, www.sas.com). For this  
45 multilevel analysis, four models were constructed. The first model is constructed without  
46 independent variables to assess the effect of the community variation on maternal anemia.  
47 Individual level factors were incorporated in the second model. In the third model the community  
48 level factors were included. Finally, both individual and community level factors were included in  
49 the fourth model.  
50  
51  
52  
53  
54  
55  
56  
57  
58  
59  
60

The results of fixed effects were presented as odd ratio (OR) with 95% confidence intervals (CIs). An adjusted odds ratio (AOR) with 95% CIs was computed to identify the independent factors of maternal anemia and a p-value <0.05 was used as a measure of statistical significance. The random effects (variation of effects) was measured by intra-cluster correlation coefficient (ICC) (variance partition coefficient) [28], percentage change in variance (PCV) [29] and median odd ratio (MOR) [28, 30] which measure the variability between clusters in the multi-level models. ICC explains the cluster variability while MOR can quantify unexplained cluster variability (heterogeneity). MOR translates cluster variance into OR scale. In the multilevel model, PCV can measure the total variation due to factors at the community and individual level [29]. The ICC, PCV and MOR were determined using the estimated variance of clusters using the following formula [28, 29].

$$ICC = \frac{V}{(V + \frac{\pi^2}{3})} \quad MOR = \exp\sqrt{2 \times V \times 0.6745} \sim \exp(0.95\sqrt{V})$$

Where V is the estimated variance of clusters

And

$$PCV = \frac{(V_A - V_B)}{V_B} \times 100$$

Where  $V_A$  = variance of the initial model;  $V_B$  = variance of the model with more terms

The multilevel analysis model is one of analysis methods, which can correctly handle the correlated data [31]. A multilevel model evaluates how factors at different levels affect the dependent variable. A multilevel model provides correct parameter estimates by correcting the biases introduced from clustering by producing correct standard errors, thus correct CI, and significance tests [31]

### **Ethical consideration**

Publicly available EDHS 2016 data was used for this study. The EDHS 2016 was approved by the National Research Ethics Review Committee (NRERC) of Ethiopia and ICF Macro International. MEASURE DHS approval was obtained to use EDHS 2016. Informed consent was taken from each participant and all identifiers were removed. This analysis was approved by the University of Newcastle Human Research Ethics Committee (approval reference number is H-2018-0045).

## **Results**

### **Sociodemographic characteristics**

The data on 14,923 women were included in this analysis, including 642 clusters nested in 11 regions. The descriptive statistics of the study participants are presented in Table 2. The mean ( $\pm$  standard deviation (sd)) age of the respondents was 28.2 years ( $\pm 9.2$  years). Most of the participants lived in a rural area (78%). Nearly two thirds (66%) of participants were married or living with a partner. Almost half (48%) of the women had no formal education and around 43% were of Orthodox Tewahdo Christian religion. Only 18% of the households had access to a piped water source for drinking, and 15% access to an improved latrine facility (Table 2).

Table 2: Sociodemographic characteristics of study participants included in the analysis, EDHS 2016 (N=14,923)

| <b>Variables</b>   | <b>Weighted<br/>Frequency</b> | <b>Weighted<br/>percent</b> |
|--------------------|-------------------------------|-----------------------------|
| Age                |                               |                             |
| 15-19              | 3165                          | 21.2                        |
| 20-29              | 5467                          | 36.6                        |
| 30-39              | 4078                          | 27.3                        |
| 40-49              | 2213                          | 14.8                        |
| Place of residence |                               |                             |
| Urban              | 3169                          | 21.2                        |
| Rural              | 11754                         | 78.8                        |
| Educational status |                               |                             |
| No education       | 7215                          | 48.3                        |
| Primary            | 5244                          | 35.1                        |
| Secondary          | 1676                          | 11.2                        |
| Higher             | 789                           | 5.3                         |
| Marital status     |                               |                             |
| Single             | 3758                          | 25.2                        |

|                            |      |      |
|----------------------------|------|------|
| Married                    | 9800 | 65.7 |
| Divorced/widowed/separated | 1365 | 9.1  |
| Religion                   |      |      |
| Orthodox                   | 6447 | 43.2 |
| Protestant                 | 3514 | 23.5 |
| Muslim                     | 4645 | 31.1 |
| Other                      | 317  | 2.1  |
| Region                     |      |      |
| Tigray                     | 1073 | 7.2  |
| Afar                       | 119  | 0.8  |
| Amhara                     | 3645 | 24.4 |
| Oromia                     | 5422 | 36.3 |
| Somali                     | 417  | 2.8  |
| Benishangul-Gumuz          | 146  | 1.0  |
| SNNPR                      | 3124 | 20.9 |
| Gambella                   | 42   | 0.3  |
| Harari                     | 32   | 0.2  |
| Addis Ababa                | 825  | 5.5  |
| Dire Dawa                  | 77   | 0.5  |
| Wealth index               |      |      |
| Poorest                    | 2519 | 16.9 |
| Poorer                     | 2717 | 18.2 |
| Middle                     | 2891 | 19.4 |
| Richer                     | 2979 | 20.0 |
| Richest                    | 3816 | 25.6 |
| BMI                        |      |      |
| <18.5                      | 3060 | 22.1 |
| 18.5-24.9                  | 9740 | 70.5 |
| ≥25                        | 1018 | 7.4  |
| Birth interval             |      |      |
| < 24 months                | 1415 | 18.3 |

|                                             |       |      |
|---------------------------------------------|-------|------|
| >= 24 months                                | 6305  | 81.7 |
| Current use of contraceptive                |       |      |
| Yes                                         | 1088  | 7.3  |
| No                                          | 13835 | 92.7 |
| Iron folate intake during pregnancy         |       |      |
| Yes                                         | 3108  | 42.4 |
| No /don't know                              | 4220  | 57.6 |
| Gravidity of women (children ever born)     |       |      |
| 0                                           | 4745  | 31.8 |
| 1-3                                         | 4715  | 31.6 |
| 4+                                          | 5464  | 36.6 |
| Children ever born in the preceding 5 years |       |      |
| 0                                           | 7595  | 50.9 |
| 1                                           | 4475  | 30.0 |
| 2+                                          | 2852  | 19.1 |
| Currently breastfeeding                     |       |      |
| Yes                                         | 4657  | 31.2 |
| No                                          | 10266 | 68.8 |
| Currently pregnant                          |       |      |
| Yes                                         | 1088  | 7.3  |
| No                                          | 13835 | 92.7 |
| Smoking                                     |       |      |
| Yes                                         | 96    | 0.6  |
| No                                          | 14827 | 99.4 |
| Birth in the last one year                  |       |      |
| 0                                           | 12474 | 83.6 |
| 1-2                                         | 2449  | 16.4 |
| HIV test                                    |       |      |
| Positive                                    | 187   | 1.3  |
| Negative                                    | 14724 | 98.7 |
| Water source                                |       |      |



|    |                                                   |             |      |
|----|---------------------------------------------------|-------------|------|
| 1  |                                                   |             |      |
| 2  |                                                   |             |      |
| 3  |                                                   |             |      |
| 4  | Piped water                                       | 2646        | 17.7 |
| 5  | Other improved                                    | 6926        | 46.4 |
| 6  | Unimproved                                        | 5351        | 35.9 |
| 7  |                                                   |             |      |
| 8  | Latrine facility type                             |             |      |
| 9  |                                                   |             |      |
| 10 | Improved toilet                                   | 2231        | 14.9 |
| 11 | Unimproved toilet                                 | 7877        | 52.8 |
| 12 |                                                   |             |      |
| 13 | Open defecation                                   | 4414        | 29.6 |
| 14 |                                                   |             |      |
| 15 | Other                                             | 401         | 2.7  |
| 16 |                                                   |             |      |
| 17 | Anemia status                                     |             |      |
| 18 |                                                   |             |      |
| 19 | Anemic                                            | 3527        | 23.6 |
| 20 | Non-anemic                                        | 11396       | 76.4 |
| 21 |                                                   |             |      |
| 22 | Proportion of women in the community who have     | 64.1 (33.6) |      |
| 23 | clean water source , m(se)                        |             |      |
| 24 |                                                   |             |      |
| 25 | Proportion of women in the community who have     | 85.1(25.0)  |      |
| 26 | unimproved latrine facility; m(se)                |             |      |
| 27 |                                                   |             |      |
| 28 | Proportion of women in the community who are in   | 35.1(30.0)  |      |
| 29 | lowest quantile of wealth index; m(se)            |             |      |
| 30 |                                                   |             |      |
| 31 |                                                   |             |      |
| 32 | Percentage of unimproved water per cluster; m(se) | 35.9 (33.6) |      |
| 33 |                                                   |             |      |
| 34 |                                                   |             |      |
| 35 |                                                   |             |      |
| 36 |                                                   |             |      |
| 37 |                                                   |             |      |
| 38 |                                                   |             |      |
| 39 |                                                   |             |      |
| 40 |                                                   |             |      |
| 41 |                                                   |             |      |
| 42 |                                                   |             |      |
| 43 |                                                   |             |      |
| 44 |                                                   |             |      |
| 45 |                                                   |             |      |
| 46 |                                                   |             |      |
| 47 |                                                   |             |      |
| 48 |                                                   |             |      |
| 49 |                                                   |             |      |
| 50 |                                                   |             |      |
| 51 |                                                   |             |      |
| 52 |                                                   |             |      |
| 53 |                                                   |             |      |
| 54 |                                                   |             |      |
| 55 |                                                   |             |      |
| 56 |                                                   |             |      |
| 57 |                                                   |             |      |
| 58 |                                                   |             |      |
| 59 |                                                   |             |      |
| 60 |                                                   |             |      |

BMI= Body mass index; SNNP= Southern nations and nationalities peoples regions; m= mean; se= standard error

### Prevalence rate of maternal anemia

Amongst all respondents, the mean ( $\pm$ sd) blood hemoglobin level (adjusted for altitude) was 12.8 g/dl ( $\pm$ 1.7 g/dl). The overall prevalence of anemia among women of reproductive age across the country was 23.6% (95% CI: (22.0, 25.3)). The prevalence of mild, moderate and severe anemia among all women of reproductive age were 17.8% (16.7-19), 5.0% (4.3-5.8) and 0.8% (0.5-1.2) respectively. There was regional variation of anemia prevalence among women of reproductive age ( $p=0.0001$ ) and higher prevalence rates observed in Afar, Somali, Gambella, Dire Dawa and Oromia regions. Lower prevalence of anemia was observed in Addis Ababa, Tigray, and Amhara regions. Rural areas had a higher prevalence [25.4 (23.5, 27.4)] of maternal anemia than urban areas [17.0 (14.4, 20.0)] ( $p=0.0001$ ). The highest proportion of maternal anemia were found in Somali regional states, while the lowest proportions were found in Addis Ababa city administration (Table 3).

Table 3: The variation of anaemia prevalence rate across different regions and different sociodemographic characteristics of women in Ethiopia, 2016

| Region             | Weighted frequency |            | Weighted proportion of anemia (95% CI) | p-value |
|--------------------|--------------------|------------|----------------------------------------|---------|
|                    | Anemic             | Non-anemic |                                        |         |
| Place of residence |                    |            |                                        |         |
| Urban              | 538                | 2630       | 17.0 (14.4,20.0)                       | 0.0001  |
| Rural              | 2989               | 8766       | 25.4 (23.5, 27.4)                      |         |
| Region             |                    |            |                                        |         |
| Tigray             | 212                | 861        | 19.7 (16.8,23.0)                       | 0.0001  |
| Afar               | 53                 | 66         | 44.7 (39.9,49.6)                       |         |
| Amhara             | 627                | 3019       | 17.2 (14.9,19.7)                       |         |

|                         |      |       |                   |                 |
|-------------------------|------|-------|-------------------|-----------------|
| Oromia                  | 1480 | 3942  | 27.2 (23.8,31.1)  |                 |
| Somali                  | 248  | 169   | 59.5 (55.2,63.7)  |                 |
| Benishangul-<br>Gumuz   | 28   | 118   | 19.2 (16.1,22.7)  |                 |
| SNNP                    | 704  | 2420  | 22.5 (19.4,26.0)  |                 |
| Gambella                | 11   | 31    | 26.1 (21.3,31.5)  |                 |
| Harari                  | 9    | 23    | 27.7 (23.7,32.1)  |                 |
| Addis Ababa             | 132  | 693   | 16 (13.5,18.8)    |                 |
| Dire Dawa               | 23   | 54    | 30 (25.8,34.8)    |                 |
| Education status        |      |       |                   |                 |
| No-education            | 2002 | 5212  | 27.8 (25.4,30.2)  | 0.0001          |
| Primary                 | 1136 | 4108  | 21.7(19.8,23.7)   |                 |
| Secondary               | 297  | 1378  | 17.8 (14.9,21.0)  |                 |
| Higher                  | 91   | 697   | 11.5(8.2,16.0)    |                 |
| Wealth index            |      |       |                   |                 |
| Poorest                 | 863  | 1656  | 34.3(29.7,39.1)   | 0.0001          |
| Poorer                  | 688  | 2028  | 25.3(22.6,28.3)   |                 |
| Middle                  | 686  | 2205  | 23.7(21.2,26.5)   |                 |
| Richer                  | 625  | 2354  | 21.0(18.6,23.6)   |                 |
| Richest                 | 664  | 3152  | 17.4(15.1,19.9)   |                 |
| Currently pregnant      |      |       |                   |                 |
| Yes                     | 317  | 771   | 29.1 (24.9,33.7)  | 0.003           |
| No                      | 3210 | 10625 | 23.2 (21.6,24.9)  |                 |
| Currently Breastfeeding |      |       |                   |                 |
| Yes                     | 1317 | 3340  | 28.3 (25.7,31.0)  | 0.0001          |
| No                      | 2210 | 8055  | 21.5 (20.0,23.2)  | Around          |
| Total                   | 3527 | 11396 | 23.6 (22.0, 25.3) | 1,080<br>(7.3%) |

participants were pregnant at the time of the interview. The mean hemoglobin level among pregnant women was 11.7 g/dl ( $\pm 1.8$  g/dl) and 29.1% (95%CI: 24.9-33.7) of these women were anemic. The prevalence of anemia was higher among pregnant women [29.1 (24.9, 33.7)] than

non-pregnant women [23.2 (21.6,24.9)] (p= 0.003) (Table 3). The mean hemoglobin value of women in their second and third trimester was significantly lower compared to women in their first trimester (p = 0.001). The mean hemoglobin levels in pregnant women who had less than 24 months birth interval (for their most recent birth) was significantly lower compared to women who had a birth interval of less than or equal to 24 months (p= 0.0001). Similarly receiving Iron folate supplements during pregnancy improved the mean haemoglobin values among pregnant women (Table 4).

Table 4 Hemoglobin level among pregnant women in Ethiopia, 2016

| Variables                 | Number | Hemoglobin level (g/dl)<br>(mean(sd)) | P values of ANOVA<br>or independent t test |
|---------------------------|--------|---------------------------------------|--------------------------------------------|
| Children ever born (CEB)  | 1,088  |                                       | 0.0001                                     |
| 0                         | 213    | 12.1(1.7)                             |                                            |
| 1-3                       | 484    | 11.7(1.8)                             |                                            |
| 4+                        | 390    | 11.5 (1.8)                            |                                            |
| Pregnancy stage           | 1,088  |                                       | 0.0001                                     |
| 1 <sup>st</sup> trimester | 226    | 12.4 (1.7)                            |                                            |
| 2 <sup>nd</sup> trimester | 433    | 11.6 (1.6)                            |                                            |
| 3 <sup>rd</sup> trimester | 429    | 11.5 (1.9)                            |                                            |
| CEB in last 5 years       | 1,088  |                                       | 0.0001                                     |
| 0                         | 339    | 12.1 (1.7)                            |                                            |
| 1                         | 484    | 11.7 (1.8)                            |                                            |
| 2+                        | 265    | 11.4 (1.9)                            |                                            |
| Fe-Fol supplementation    | 749    |                                       | 0.018                                      |
| Yes                       | 251    | 11.8 (1.5)                            |                                            |
| No                        | 498    | 11.5 (1.9)                            |                                            |
| Birth interval            | 702    |                                       | 0.0001                                     |
| < 2 months                | 206    | 11.2 (2.0)                            |                                            |
| >= 2 months               | 497    | 11.9 (1.5)                            |                                            |

sd = standard deviation, Fe-Fol= Iron-folate, CEB = Children Ever Born

Nearly one-third (n= 4,657; 31.2%) of women were breastfeeding at the time of the survey. The average hemoglobin level among lactating mothers was 12.6 g/dl ( $\pm 1.7$  g/dl) and about 28.3% (95% CI: 25.7-31.0%) of these women were anemic. Lactating women had higher odds of anemia than non-lactating women with AOR 1.09 (95% CI: 1.025 -1.28).

## **Determinate factors of maternal anemia**

### **Multilevel Analysis (Fixed effect analysis)**

The results of multilevel logistic regression for the individual and community level variables are presented in Table 5. In the full model in which all individual and community level factors are included, residence, education, religion, wealth index, pregnancy and breastfeeding status, gravidity of women, and lack of availability of an improved latrine were factors significantly associated with maternal anemia.

#### **Individual factors**

The average hemoglobin value was significantly different across age groups (p=0.0001). The highest mean hemoglobin level, 13 g/dl was observed in the youngest (15-19 years) age group while the lowest mean hemoglobin level, 12.71 g/dl in the 30-34 years age group. The general pattern indicated roughly linear decline among the ages of 15-34 years (Figure 1). Women aged 40-49 years old were 25% less likely to be anemic compared to women in the youngest age group (15-19 years old) (AOR= 0.75 (0.64, 0.96). Those women with limited education were 1.37 times more likely to be anemic than women who completed higher education (AOR = 1.37; 95 % CI: 1.102–1.72). The odds of anemia increased by 29% (AOR = 1.29; 95 % CI: 1.014-1.60) when comparing the poorest to the richest women. The odds of anemia was higher in women who were pregnant (AOR=1.28; 95% CI: 1.10, 1.51) compared to those that weren't (non-pregnant). Women who were currently breastfeeding were 9% (AOR =1.09; 95% CI: 1.025, 1.28) more likely to be anemic. The odds of anemia were 39% higher among mothers who had given birth to four or more children (AOR=1.39; 95% CI: 1.13, 1.69). Women who gave birth to two or more children in the preceding five years of the survey were at higher risk of having anemia (AOR =1.31; 95% CI: 1.09,1.57). In this study, women who were HIV positive had a twofold increased odds for anemia compared to women classified as HIV negative (AOR= 2.11; 95% CI: 1.59, 2.79) (Table 5).

#### **Community level factors**

Living in a rural area is associated with a 29% higher odds of anemia among women of reproductive age than women of urban residence (AOR=1.29; 95%CI: 1.02, 1.63). Women from households without access to a latrine had 18% higher odds of anemia compared to women from households that had an improved latrine facility (AOR = 1.18; 95 % CI: 1.01, 1.39). The higher odds of anemia was observed in Somali regional state (AOR = 2.163; 95 % CI: 1.58, 2.89) compared to Dire Dawa. However, the odds of maternal anemia were lower in Gambella, Addis Ababa, Amhara and Oromia region compared to Dire Dawa (Table 5).

### Multilevel analysis (random effect analysis)

The result of the random effects model is shown in Table 5. The result of the random effect shows that maternal anemia was not random across the communities ( $t^2=0.88$ ,  $p<0.0001$ ).

About 21% of the variance in the odds of maternal anemia could be attributed to community level factors as calculated by the ICC based on estimated intercept component variance. After adjusting for individual and community level factors, the variation in maternal anemia across communities remained statistically significant. About 16% of the odds of maternal anemia variation across communities was observed in the full model (Model 4) (Table 5).

Moreover, the MOR indicated that maternal anemia was attributed to community level factors. The MOR for anemia was 2.44 in the empty model (Model 1); this showed that there is variation between communities (clustering) since MOR is 2.4 times higher than the reference (MOR = 1). The unexplained community variation in maternal anemia decreased to MOR of 2.1 when all factors were added to the null model (empty model). This indicates that when all factors are included, the effect of clustering is still statistically significant in the full model (Table 5).

$$ICC = \frac{V}{(V + \frac{\pi^2}{3})} \quad MOR = \exp\sqrt{2 \times V \times 0.6745} \sim \exp(0.95\sqrt{V})$$

Where V is the estimated variance of clusters

And

$$PCV = \frac{(V_A - V_B)}{V_B} \times 100$$

Where  $V_A$  = variance of the initial model;  $V_B$  = variance of the model with more terms

Table 5: Determinant factors bivariate association between maternal anemia and individual and community contextual characteristics of Ethiopian women, 2016

| Variables                       | Model 1 | Model 2            | Model 3                 | Model 4                              |
|---------------------------------|---------|--------------------|-------------------------|--------------------------------------|
|                                 |         | Individual factors | Community level factors | Individual + community level factors |
| <b>Individual level factors</b> |         |                    |                         |                                      |
| Age                             |         |                    |                         |                                      |
| 15-19                           |         | 1                  |                         | 1                                    |
| 20-29                           |         | 0.93 (0.81,1.07)   |                         | 0.96 (0.82, 1.19)                    |
| 30-39                           |         | 0.89 (0.75,1.10)   |                         | 0.92 (0.78,1.11)                     |
| 40-49                           |         | 0.76 (0.61,0.92 )  |                         | 0.75 (0.64,0.96)                     |
| Educational status              |         |                    |                         |                                      |
| No education                    |         | 1.41 (1.13,1.76)   |                         | 1.37 (1.10, 1.72)                    |
| Primary                         |         | 1.22 (0.99,1.51)   |                         | 1.24 (1.00,1.53)                     |
| Secondary                       |         | 1.22 (0.98,1.5)    |                         | 1.23(0.98,1.52)                      |
| Higher                          |         | 1                  |                         | 1                                    |
| Marital status                  |         |                    |                         |                                      |
| Single                          |         | 0.99 (0.80, 1.22)  |                         | 0.972 (0.81,1.22)                    |
| Married                         |         | 1.07 (0.92, 1.23)  |                         | 1.09 (0.91,1.23)                     |
| Divorced/widowe<br>d/separated  |         | 1                  |                         | 1                                    |
| Religion                        |         |                    |                         |                                      |
| Orthodox                        |         | 1                  |                         |                                      |
| Protestant                      |         | 1.36 (1.16, 1.58)  |                         | 1.37 (1.15,1.63)                     |
| Muslim                          |         | 2.04 (1.79, 2.33)  |                         | 1.36 (1.16, 1.58)                    |
| Other                           |         | 1.49 (1.05, 2.12)  |                         | 1.525 (1.06, 2.13)                   |
| Wealth index                    |         |                    |                         |                                      |
| Poorest                         |         | 1.73 (1.48, 2.03)  |                         | 1.29 (1.014,1.60)                    |
| Poorer                          |         | 1.31 (1.10, 1.54)  |                         | 1.21 (0.96,1.45)                     |
| Middle                          |         | 1.28 (1.08,1.51)   |                         | 1.22 (0.98,1.50)                     |
| Richer                          |         | 1.04 (0.88,1.24)   |                         | 1.01(0.82,1.24)                      |

|    |                                               |                   |                   |
|----|-----------------------------------------------|-------------------|-------------------|
| 1  |                                               |                   |                   |
| 2  |                                               |                   |                   |
| 3  | Richest                                       | 1                 | 1                 |
| 4  |                                               |                   |                   |
| 5  | Current use of contraceptives                 |                   |                   |
| 6  | Yes                                           | 0.99 (0.90,1.10)  | 1.0 (0.91,1.11)   |
| 7  | No                                            | 1                 | 1                 |
| 8  |                                               |                   |                   |
| 9  | Currently pregnant                            |                   |                   |
| 10 | Yes                                           | 1.30 (1.11,1.52)  | 1.28 (1.10,1.51)  |
| 11 | no                                            | 1                 | 1                 |
| 12 |                                               |                   |                   |
| 13 | Currently breastfeeding                       |                   |                   |
| 14 | yes                                           | 1.12 (1.00,1.24)  | 1.09 (1.03,1.28)  |
| 15 | No                                            | 1                 | 1                 |
| 16 |                                               |                   |                   |
| 17 | Gravidity of women (total children ever born) |                   |                   |
| 18 | 0                                             | 1                 | 1                 |
| 19 | 1-3                                           | 1.23 (1.03,1.46)  | 1.22 (1.02,1.44)  |
| 20 | 4+                                            | 1.40 (1.15,1.72)  | 1.39 (1.13,1.69)  |
| 21 |                                               |                   |                   |
| 22 | Smoking                                       |                   |                   |
| 23 | Yes                                           | 0.98 (0.64,1.50)  | 1.05 (0.69,1.61)  |
| 24 | No                                            | 1                 | 1                 |
| 25 |                                               |                   |                   |
| 26 | Birth in the last 1 year                      |                   |                   |
| 27 | 0                                             | 1                 | 1                 |
| 28 | 1-2                                           | 1.20 (1.05,1.37)  | 1.15 (1.01,1.32)  |
| 29 |                                               |                   |                   |
| 30 | Children ever born in preceding 5 year        |                   |                   |
| 31 | 0                                             | 1                 | 1                 |
| 32 | 1                                             | 1.12 (0.96,1.29)  | 1.10 (0.95,1.27)  |
| 33 | 2+                                            | 1.39 (1.16,1.66)  | 1.31 (1.09,1.57)  |
| 34 |                                               |                   |                   |
| 35 | HIV test                                      |                   |                   |
| 36 | Positive                                      | 2.19 (1.65, 2.91) | 2.11 (1.59, 2.79) |
| 37 | Negative                                      | 1                 | 1                 |
| 38 |                                               |                   |                   |
| 39 | <b>Community level factors</b>                |                   |                   |
| 40 | Place of residence                            |                   |                   |
| 41 | Urban                                         | 1                 | 1                 |
| 42 | Rural                                         | 1.67 (1.35,2.05)  | 1.29(1.02,1.63)   |
| 43 |                                               |                   |                   |



1  
2  
3  
4  
5  
6  
7  
8  
9  
10  
11  
12  
13  
14  
15  
16  
17  
18  
19  
20  
21  
22  
23  
24  
25  
26  
27  
28  
29  
30  
31  
32  
33  
34  
35  
36  
37  
38  
39  
40  
41  
42  
43  
44  
45  
46  
47  
48  
49  
50  
51  
52  
53  
54  
55  
56  
57  
58  
59  
60

| Region                                                                                |                                    |              |                  |                  |             |
|---------------------------------------------------------------------------------------|------------------------------------|--------------|------------------|------------------|-------------|
|                                                                                       | Tigray                             |              | 0.39(0.28,0.53)  | 0.52(0.38, 0.72) |             |
|                                                                                       | Afar                               |              | 1.25 (0.91,1.7)  | 1.14 (0.83,1.56) |             |
|                                                                                       | Amhara                             |              | 0.30 (0.22,0.41) | 0.39 (0.28,0.54) |             |
|                                                                                       | Oromia                             |              | 0.55 (0.41,0.75) | 0.57 (0.42,0.78) |             |
|                                                                                       | Somali                             |              | 2.40 (1.78,3.27) | 2.16 (1.58,2.90) |             |
|                                                                                       | Benishangul-<br>Gumuz              |              | 0.36 (0.25,0.50) | 0.37 (0.26,0.52) |             |
|                                                                                       | SNNPR                              |              | 0.40 (0.29,0.54) | 0.41(0.29,0.57)  |             |
|                                                                                       | Gambella                           |              | 0.63 (0.45,0.87) | 0.63(0.45,0.89)  |             |
|                                                                                       | Harari                             |              | 0.74 (0.53,1.04) | 0.76(0.54,1.04)  |             |
|                                                                                       | Addis Ababa                        |              | 0.54 (0.39,0.73) | 0.67(0.49,0.91)  |             |
|                                                                                       | Dire Dawa                          |              | 1                | 1                |             |
| Water source                                                                          |                                    |              |                  |                  |             |
|                                                                                       | Piped water                        |              | 1                | 1                |             |
|                                                                                       | Other improved                     |              | 1.15 (0.95,1.39) | 1.04 (0.86,1.26) |             |
|                                                                                       | Un-improved                        |              | 1.18 (0.95,1.44) | 1.03 (0.83,1.27) |             |
| Latrine facility type                                                                 |                                    |              |                  |                  |             |
|                                                                                       | Improved toilet                    |              | 1                | 1                |             |
|                                                                                       | Unimproved toilet                  |              | 1.12 (0.97,1.29) | 1.08 (0.94,1.25) |             |
|                                                                                       | Open defecation                    |              | 1.33 (1.15,1.55) | 1.18 (1.00,1.39) |             |
|                                                                                       | Other                              |              | 0.86 (0.64,1.17) | 0.94 (0.69,1.27) |             |
| <b>Random effects (effect of variation/ measure of variation for maternal anemia)</b> |                                    |              |                  |                  |             |
|                                                                                       | Community level                    | 0.888 (0.07) | 0.46(0.05)       | 0.32(0.04)       | 0.31(0.035) |
|                                                                                       | variance (SE)                      |              |                  |                  |             |
|                                                                                       | P- value                           | 0.001        | 0.001            | 0.001            | 0.001       |
|                                                                                       | DIC(-2log<br>likelihood)           | 7926.056     | 7749.25          | 7720.74          | 7613.56     |
|                                                                                       | ICC (%)                            | 21.25        | 16.1             | 18.3             | 15.86       |
|                                                                                       | Explained<br>variation –PCV<br>(%) | Reference    | 40.95            | 21.0             | 43.1        |

---

|     |      |      |     |     |
|-----|------|------|-----|-----|
| MOR | 2.44 | 2.13 | 2.3 | 2.1 |
|-----|------|------|-----|-----|

---

Note: Model 1= empty model (without the predictors); Model 2= adjusted for individual factors; Model 3 = adjusted for community level factors; Model 4 = adjusted for both community and individual level factors; DIC = Deviance information criterion; ICC= Intra-cluster correlation coefficient; MOR= Median Odd Ratio; PCV = percentage change in variance; SE= Standard Error; SNNPR=Southern Nations and nationalities region

For peer review only

## Spatial data analysis

The spatial analysis helps to visualize anemia prevalence rates across Ethiopia on a map. In addition it helps to test whether the anemia prevalence rate is randomly distributed or not; to test this we can use the global and local spatial autocorrelation using Getis-Ord Gi statistics. Figure 2 displays the empirical Bayes smoothed proportion estimate of maternal anemia across regions in Ethiopia. The higher/severe prevalence ( $\geq 40\%$ ) of anemia among women was observed in Afar and Somali regional states. Likewise, moderate prevalence rates (20-40%) of anemia was occurred in Oromia, Gambella, SNNPR, Harari and Dire Dawa regional states. In contrast, the proportion of anemic women classified as mild was lowest ( $< 20\%$ ) in Tigray and Amhara regional state as well Addis Ababa City Administration.

Similarly, the standardized prevalence ratio by regions (standardized to the national average prevalence of 23.6%), ranging from 0.63 to 2.39, was overlaid (Figure 3). Higher prevalence ratio of maternal anemia was observed in Somali (2.39), Afar (1.8) Oromia (1.17), Dire Dawa 1.15, Gambella (1.12) regional states (Figure 3); whereas, lower prevalence ratio of anemia occurred in other regional states - Addis Ababa (0.64), Amhara (0.76), Benishangul-Gumuz (0.79), SNNPR (0.96), Tigray (0.85)

Figure 4 displays the smoothed anemia prevalence rates at Zonal level where higher anemia rates were observed in all zones of Afar and Somali regions as well as in some zones of Oromia. Likewise, the higher standardize ratio of maternal anemia was observed in all zones of Afar and Somali regions as well as in some zones of Oromia (Figure 5).

The spatial distributions of maternal anemia at the lower level (cluster level) is displayed in figure 6. The spatial investigation at the cluster level indicated that statistically high hotspots of anemia were observed in the eastern (Somali, Dire Dawa and Harari regions) and in north-eastern (Afar) parts of the country, while low spots of anemia were observed in the northern (Tigray, Amhara), central (Addis Ababa, Oromia) and western (Benishangul-Gumuz and Gambella) parts of the country (Figure. 6).

## Discussion

1  
2  
3 Approximately a quarter of women of reproductive age were anemic in the current study,  
4 indicating that anemia is a moderate public health problem at the national level in Ethiopia [1].  
5 However, geographic differences demonstrated that anemia is a particularly serious public health  
6 problem in 5 of the 11 Ethiopian states. A higher number of anemia cases were observed in the  
7 eastern and north-eastern parts of the country, which are less developed compared to other  
8 Ethiopian states in terms of economy, gender, health care facility and food shortage [32]. The  
9 geographical disparity of anaemia across the regional states might be attributable to the regional  
10 variations in food consumption preferences [33, 34], the occurrence of communicable diseases  
11 [35], and availability of health care facilities [36]. The altitude has effect on the hemoglobin level  
12 [1] which results a disparity of anemia occurrence across the country. In addition, lack of clean  
13 water access and unimproved latrine facility would increase the occurrence of soil transmitted  
14 infection [37] which could lead to anemia [38], might be the reasons for the observed geographical  
15 differences.  
16  
17

18  
19 According to the final model, both individual and community level factors were responsible for  
20 about 43% of the disparity of anemia prevalence rates among women of reproductive age in  
21 Ethiopia. After adjusting for all factors in the model, the likelihood of having anemia was higher  
22 among those of younger age, with lower levels of education, living in rural areas, in the lowest  
23 wealth quantile, who were currently pregnant or breastfeeding, with high gravidity, and having  
24 birthed in the year prior to the survey and without access to an improved latrine facility.  
25  
26

27  
28 Women aged 40-49 years had a lower likelihood of being anemic compared to women aged  
29 between 15-19 years. This finding is in line with other study findings from Ethiopia [10, 13] and  
30 Benin [39]. This could be due to the fact that low fertility rates occurred in this age group [5]. But,  
31 findings from Iran [40] reported that women aged 20-24 were less likely to be anemic compared  
32 to those aged 45-49, however, this might be a result of Iran having a targeted intervention for  
33 younger women or women of reproductive age.  
34  
35

36  
37 This study found that women who did not have formal education had higher odds of anemia than  
38 those with higher education. This is consistent with the studies conducted in developing  
39 countries[18] including in Ethiopia [10], Timor-Leste [41], Benin [39] and India [42, 43] which  
40 reports that low education was associated with the higher odds of anemia among women of  
41 reproductive age. Formal education might assist the women to get knowledge that in turn helps  
42  
43  
44  
45  
46  
47  
48  
49  
50  
51  
52  
53  
54  
55  
56  
57  
58  
59  
60

1  
2  
3 them to follow better lifestyle behaviours like good nutrition, better health-seeking habit and  
4 hygiene practices that can prevent maternal anemia.  
5  
6

7 The likelihood of having anemia was higher in rural residence compared to the urban residence.  
8 This is in agreement with the study conducted in low income countries that revealed living in rural  
9 areas were identified as determinant factors to anemia [18]. The lowest wealth quantile compared  
10 to highest quantile was associated with higher risk of maternal anemia. Results of this study show  
11 that women who had poorest wealth quintile were 30% more likely to be anemic than women who  
12 belongs to the richest quintile, which is in line with the results of the studies conducted in other  
13 developing countries [18] like Benin [39] and India [43, 44]. This might be due to the fact that low  
14 income leads to poor dietary intake [45, 46], which in turn leads to inadequate nutrient intake and  
15 nutritional status [47]. More than 38 % of the Ethiopian population belongs to the poor and poorest  
16 wealth quintile, which indicates a large percentage of women who are at risk for anemia because  
17 of low socioeconomic position [5].  
18  
19  
20  
21  
22  
23  
24  
25

26  
27 The role of pregnancy as a disposing factor for anemia is also explicit in this current study.  
28 Pregnant mothers were 28% more likely to have anemia than non-pregnant women. Pregnancy  
29 predisposes the women to low haemoglobin which results in anemia. The studies conducted in  
30 Nepal [48] and India [49] reported similar findings that pregnant women were more likely to be  
31 anemic than non-pregnant women.  
32  
33  
34  
35

36 The findings of this study clearly show the role of women's fertility in anemia. An increased odds  
37 of anemia was associated with high gravidity, births in the past five years of the survey and having  
38 a birth in the last year. Similar studies in Ethiopia [10], Iran [40] and Timor-Leste [41] also  
39 document this association between parity and risk of anemia. The study results from Pakistan [50,  
40 51] and Iran [40] reported that women with parity of four or more were found to be at increased  
41 odds of anaemia than women with lower parity. And so, emphasis needs to be given for the family  
42 planning services.  
43  
44  
45  
46  
47  
48

49 The recent report illustrated that more than half of the Ethiopian population had access to  
50 unimproved toilet facilities [52]. Our study findings revealed that women from households with  
51 unimproved latrine facility were more likely to be anemic than women from households with  
52 improved latrine facility which is in agreement with other research findings [39, 53]. The possible  
53 justification might be the unimproved latrine facility would expose the women to helminthic  
54  
55  
56  
57  
58  
59  
60

1  
2  
3 infections [37], which in turn resulted in anemia in women [38]. Increased odds of anemia was  
4 observed in women with HIV positive. In this study, women with HIV positive had a twofold  
5 increased odds for anemia.  
6  
7

### 8 9 **Strength and Limitations**

10 This study used large population based data with a large sample size, which is representative to all  
11 regions of Ethiopia. Furthermore, a combination of statistical methods (spatial analysis and  
12 multilevel logistics analysis) were applied for this study which allows the understanding of the  
13 role of contextual and geographical factors for the occurrence of anemia among women of  
14 reproductive age. Because of the cross sectional nature of the EDHS data, the cause effect and  
15 temporal relationship could not be established based on these study findings. Similarly, essential  
16 factors such as dietary intake and behavioural factors were not available in EDHS survey so that  
17 it could not be possible to incorporate these variables in the analysis. Furthermore, EDHS was a  
18 questionnaire based survey and relied on the memory of the respondent, and as a result recall bias  
19 might be a threat for this study.  
20  
21  
22  
23  
24  
25  
26  
27

### 28 **Conclusion**

29 This study indicates that considerable geographic disparities of maternal anemia prevalence rate  
30 occurs inside Ethiopia. The results of this study revealed that maternal anemia was non-random  
31 across the country, where significantly high spots of anemia was observed in the eastern and north  
32 eastern part of the country while low spots of anemia were observed in northern and western part  
33 of the country. About 43% of the disparity in maternal anemia occurrence across the communities  
34 was attributable to both individual and community level factors. The increased occurrence of  
35 maternal anemia was associated with the individual and community level factors. Being rural  
36 residence, having no formal education, being in the poorest wealth index, either currently pregnant  
37 or breastfeeding, and higher gravidity for the woman were factors that increased the odds of  
38 maternal anemia at the individual level, whereas lack of clean water source, and access to an  
39 unimproved toilet facility were factors significantly associated with maternal anemia.  
40  
41  
42  
43  
44  
45  
46  
47  
48

49 Accordingly, the prevention of maternal anemia needs multifaceted intervention approaches like  
50 for instance improving economic status of women and teaching women, and improving availability  
51 of clean water and toilet facilities. Anemia prevention strategies have to be targeted on the  
52 identified factors. Priority should be given for those states or areas which have high hotspots of  
53  
54  
55  
56  
57

1  
2  
3 occurrence of maternal anemia. Particularly, any intervention programs needs to be prioritized for  
4 pregnant women, women with recent births, those with lower education, and women living in rural  
5 areas. The regions with the greatest numbers of anemic women (Afar and Somali) should be  
6 prioritized, as the burden of anemia is higher in which more than 50% of women in these region  
7 are anemic.  
8  
9  
10  
11

### 12 **Acknowledgment**

13  
14 We would like to thank DHS program for allowing the EDHS data for this study.  
15

### 16 **Authors' contributions**

17 Formulating the research question (s) KTK CC DL EG; designing the study KTK CC DL EG;  
18 analysed the data and interpreted the results KTK CC DL EG; drafted, wrote, reviewed and  
19 approved the final manuscript KTK CC DL EG.  
20  
21  
22

### 23 **Financial support**

24 This research received no specific grant from any funding agency, commercial or not-for-profit  
25 sectors.  
26  
27

### 28 **Conflicts of interest**

29 Authors declare that they have no any conflicting interests.  
30

### 31 **Data sharing statement**

32 The dataset is available at measure DHS program website (<http://www.measuredhs.com>)  
33  
34  
35  
36  
37  
38  
39  
40  
41  
42  
43  
44  
45  
46  
47  
48  
49  
50  
51  
52  
53  
54  
55  
56  
57  
58  
59  
60

1  
2  
3 Figure 1: Average hemoglobin value with 95% CI at different age groups, Ethiopia, 2016

4 Figure 2. Spatial Empirical Bayesian smoothed (SEBS) percentage of maternal anemia across  
5 regions  
6  
7

8  
9 Figure 3. Standardized prevalence ratio for anemia among women of reproductive age across the  
10 regions in Ethiopia (standardized to national prevalence of 23.6%).  
11  
12

13 Figure 4 Spatial Empirical Bayesian smoothed (SEBS) percentage of maternal anemia across  
14 Zones  
15

16 Figure 5. Standardized prevalence ratio for anemia among women of reproductive age across  
17 Zones in Ethiopia (standardized to national prevalence of 23.6%).  
18  
19

20 Figure 6. Spatial pattern of hot spots and cold spots of maternal anemia rate at cluster level in  
21 Ethiopia, EDHS, 2016  
22  
23  
24

## 25 References

- 26  
27  
28 1. WHO. Haemoglobin concentrations for the diagnosis of anaemia and assessment of  
29 severity. Vitamin and Mineral Nutrition Information System. Geneva, World Health  
30 Organization, 2011 (WHO/NMH/NHD/MNM/11.1)  
31 (<http://www.who.int/vmnis/indicators/haemoglobin.pdf>, accessed on Jan 9, 2017). 2011.  
32 2. Stevens GA, Finucane MM, De-Regil LM, et al. Global, regional, and national trends in  
33 haemoglobin concentration and prevalence of total and severe anaemia in children and  
34 pregnant and non-pregnant women for 1995–2011: a systematic analysis of population-  
35 representative data. *The Lancet Global Health*. 2013;1(1):e16-e25.  
36 3. Kassebaum NJ, Jasrasaria R, Naghavi M, et al. A systematic analysis of global anemia  
37 burden from 1990 to 2010. *Blood*. 2014;123(5):615-24.  
38 4. WHO. Global nutrition targets 2025: anaemia policy brief (WHO/NMH/NHD/14.4).  
39 Geneva: World Health Organization; 2014.  
40 [http://apps.who.int/iris/bitstream/10665/148556/1/WHO\\_NMH\\_NHD\\_14.4\\_eng.pdf?](http://apps.who.int/iris/bitstream/10665/148556/1/WHO_NMH_NHD_14.4_eng.pdf?),  
41 Accessed on August 27, 2017). 2014.  
42 5. Central Statistical Agency (CSA) [Ethiopia] and ICF. Ethiopia Demographic and Health  
43 Survey 2016. Addis Ababa, Ethiopia, and Rockville, Maryland, USA: CSA and ICF.  
44 2016.  
45 6. Melku M, Addis Z, Alem M, et al. Prevalence and Predictors of Maternal Anemia during  
46 Pregnancy in Gondar, Northwest Ethiopia: An Institutional Based Cross-Sectional Study.  
47 *Anemia*. 2014;2014:108593.  
48 7. Gebremedhin S, Enquesslassie F, Umeta M. Prevalence and Correlates of Maternal  
49 Anemia in Rural Sidama, Southern Ethiopia. *African Journal of Reproductive Health / La*  
50 *Revue Africaine de la Santé*; Reproductive. 2014;18(1):44-53.  
51  
52  
53  
54  
55  
56  
57  
58  
59  
60



- 1
  - 2
  - 3
  - 4
  - 5
  - 6
  - 7
  - 8
  - 9
  - 10
  - 11
  - 12
  - 13
  - 14
  - 15
  - 16
  - 17
  - 18
  - 19
  - 20
  - 21
  - 22
  - 23
  - 24
  - 25
  - 26
  - 27
  - 28
  - 29
  - 30
  - 31
  - 32
  - 33
  - 34
  - 35
  - 36
  - 37
  - 38
  - 39
  - 40
  - 41
  - 42
  - 43
  - 44
  - 45
  - 46
  - 47
  - 48
  - 49
  - 50
  - 51
  - 52
  - 53
  - 54
  - 55
  - 56
  - 57
  - 58
  - 59
  - 60
8. Kedir H, Berhane Y, Worku A. Khat chewing and restrictive dietary behaviors are associated with anemia among pregnant women in high prevalence rural communities in eastern Ethiopia. *PLoS One*. 2013;8(11):e78601.
9. Addis Alene K, Mohamed Dohe A. Prevalence of Anemia and Associated Factors among Pregnant Women in an Urban Area of Eastern Ethiopia. *Anemia*. 2014;2014:561567.
10. Asres Y, Yemane T, Gedefaw L. Determinant Factors of Anemia among Nonpregnant Women of Childbearing Age in Southwest Ethiopia: A Community Based Study. *Int Sch Res Notices*. 2014;2014:391580.
11. Haidar JA, Pobocik RS. Iron deficiency anemia is not a rare problem among women of reproductive ages in Ethiopia: a community based cross sectional study. *BMC Blood Disord*. 2009;9:7.
12. Haidar J. Prevalence of Anaemia, Deficiencies of Iron and Folic Acid and Their Determinants in Ethiopian Women. *Journal of Health, Population, and Nutrition*. 2010;28(4):359-68.
13. Umeta M, Haidar J, Demissie T, et al. Iron Deficiency Anaemia among Women of Reproductive Age in Nine Administrative Regions of Ethiopia. *EthiopJHealth Dev*. 2008;22(3):252-8.
14. Pokropek C, Sobolewski P, Getachew R, et al. Dietary intake patterns and insulin resistance in women with a history of gestational diabetes in the National Health and Nutrition Examination Survey (NHANES) 2000-2010. *American Journal of Obstetrics and Gynecology*. 2015;1):S308.
15. WHO. Assessing iron status of populations: report of a joint WHO/ CDC technical consultation on the assessment of iron status at the population level, 2nd ed., Geneva, WHO. Available at [http://www.who.int/nutrition/publications/micronutrients/anaemia\\_iron\\_deficiency/9789241596107.pdf](http://www.who.int/nutrition/publications/micronutrients/anaemia_iron_deficiency/9789241596107.pdf). 2007.
16. Dreyfus ML, Stoltzfus RJ, Shrestha JB, et al. Hookworms, Malaria and Vitamin A Deficiency Contribute to Anemia and Iron Deficiency among Pregnant Women in the Plains of Nepal. *J Nutr*. 2000;130:2527-36.
17. Brooker S, Hotez PJ, Bundy DA. Hookworm-related anaemia among pregnant women: a systematic review. *PLoS Negl Trop Dis*. 2008;2(9):e291.
18. Balarajan Y, Ramakrishnan U, Özaltin E, et al. Anaemia in low-income and middle-income countries. *The Lancet*. 2011;378(9809):2123-35.
19. Petry N, Olofin I, Hurrell RF, et al. The Proportion of Anemia Associated with Iron Deficiency in Low, Medium, and High Human Development Index Countries: A Systematic Analysis of National Surveys. *Nutrients*. 2016;8(11).
20. Gebre A, Mulugeta A. Prevalence of Anemia and Associated Factors among Pregnant Women in North Western Zone of Tigray, Northern Ethiopia: A Cross-Sectional Study. *J Nutr Metab*. 2015;2015:165430.
21. Kefiyalew F, Zemene E, Asres Y, et al. Anemia among pregnant women in Southeast Ethiopia: prevalence, severity and associated risk factors. *BMC Research Notes* 2014;7(771).
22. Rezende LF, Eluf-Neto J. Population attributable fraction: planning of diseases prevention actions in Brazil. *Rev Saude Publica*. 2016;50.
23. Bates I, McKew S, Sarkinfada F. Anaemia: A useful indicator of neglected disease burden and control. *PLoS Med*. 2007;4(8):e231. doi:10.1371/journal.pmed.0040231.

- 1
- 2
- 3
- 4 24. Lawson AB. *Statistical Methods in Spatial Epidemiology*. Atrium, Southern Gate, West
- 5 Sussex, England: John Wiley & Sons Inc; 2006.
- 6 25. Anselin L. *Exploring Spatial Data with GeoDaTM : A Workbook*. Center for Spatially
- 7 Integrated Social Science <http://www.csiss.org/>. 2005.
- 8 26. Banerjee S. *Spatial Data Analysis*. *Annu Rev Public Health*. 2016;37:47-60.
- 9 27. Ord J, Getis A. Local Spatial Autocorrelation Statistics: Distributional Issues and an
- 10 Application. *Geographical Analysis*. 1995;27(4):286–306.
- 11 28. Merlo J, Chaix B, Ohlsson H, et al. A brief conceptual tutorial of multilevel analysis in
- 12 social epidemiology: using measures of clustering in multilevel logistic regression to
- 13 investigate contextual phenomena. *J Epidemiol Community Health*. 2006;60(4):290-7.
- 14 29. Merlo J, Yang M, Chaix B, et al. A brief conceptual tutorial on multilevel analysis in
- 15 social epidemiology: investigating contextual phenomena in different groups of people. *J*
- 16 *Epidemiol Community Health*. 2005;59(9):729-36.
- 17 30. Larsen K, Merlo J. Appropriate assessment of neighborhood effects on individual health:
- 18 integrating random and fixed effects in multilevel logistic regression. *Am J Epidemiol*.
- 19 2005;161(1):81-8.
- 20 31. Guo G, Zhao H. Multilevel Modeling for Binary Data. *Annual Review Sociology*.
- 21 *Annual Review Sociology*. 2000;26:441–62.
- 22 32. International food policy research Institute (IFPRI) and Central Statistical agency (CSA).
- 23 *Population & Housing Census Atlas of Ethiopia 2007*, Addis Ababa, Ethiopia. 2010.
- 24 33. Ethiopian Public Health Institute. *Food Consumption Survey*. Ethiopian Food
- 25 *Consumption Survey Report*, Addis Ababa, Ethiopia. 2013.
- 26 34. Berhane G, Paulos Z, Tafere K, et al. Foodgrain Consumption and Calorie Intake Patterns
- 27 in Ethiopia, Ethiopia Strategy Support Program II (ESSP II). Working Paper No 23.
- 28 2011.
- 29 35. Ministry of Health of Ethiopia. *Health and Health Related Indicator*, Version 1, Addis
- 30 Ababa, Ethiopia. 2008.
- 31 36. Chaya N. Poor Access to Health Services: Ways Ethiopia is Overcoming Research
- 32 *Commentary*. 2007; 2(2).
- 33 37. Mara D, Lane J, Scott B, et al. Sanitation and Health. *PLoS Med* 7(11): e1000363
- 34 doi:101371/journalpm1000363. 2010.
- 35 38. Tay SCK, Nani EA, Walana W. Parasitic infections and maternal anaemia among
- 36 expectant mothers in the Dangme East District of Ghana.
- 37 39. Alaofè H, Burney J, Naylor R, et al. Prevalence of anaemia, deficiencies of iron and
- 38 vitamin A and their determinants in rural women and young children: a cross-sectional
- 39 study in Kalalé district of northern Benin. *Public Health Nutrition*: 20(7), 1203–1213
- 40 doi:101017/S1368980016003608. 2017.
- 41 40. Sadeghian M, Fatourehchi A, Lesanpezeski M, et al. Prevalence of Anemia and
- 42 Correlated Factors in the Reproductive Age Women in Rural Areas of Tabas. *J Fam Repr*
- 43 *Health* 2013;7(3).
- 44 41. Lover AA, Hartman M, Chia KS, et al. Demographic and Spatial Predictors of Anemia in
- 45 Women of Reproductive Age in Timor-Leste: Implications for Health Program
- 46 Prioritization. *PLoS ONE* 9(3): e91252 doi:101371/journalpone0091252.
- 47 42. K CG, K SK. A cross-sectional study of anemia among women of reproductive age group
- 48 (15-49 years) in a rural population of Tamil Nadu. *Int J Med Sci and PH*. 2017;6(3).
- 49
- 50
- 51
- 52
- 53
- 54
- 55
- 56
- 57
- 58
- 59
- 60

- 1
- 2
- 3
- 4 43. Balarajan YS, Fawzi WW, Subramanian SV. Changing patterns of social inequalities in
- 5 anaemia among women in India: cross-sectional study using nationally representative
- 6 data. *BMJ Open* 2013;3:e002233. doi:10.1136/bmjopen-2012002233.
- 7
- 8 44. Rammohan A, Awofeso N, Robitaille M-C. Addressing Female Iron-Deficiency Anaemia
- 9 in India: Is Vegetarianism the Major Obstacle? *ISRN Public Health*. 2012;2012:1-8.
- 10
- 11 45. Lenz A, Olinto MTA, Dias-da-Costa JS, et al. Socioeconomic, demographic and lifestyle
- 12 factors associated with dietary patterns of women living in Southern Brazil. *Cad Saude*
- 13 *Pública, Rio de Janeiro*. 2009;25(6):1297-306.
- 14
- 15 46. USAID/ENGINE. Maternal Diet and Nutrition Practices and Their Determinants: A
- 16 report on formative research findings 2014.
- 17
- 18 47. Desalegn K, Pragya S, Debebe M, et al. Nutritional Status and Associated Factors among
- 19 Pregnant Women in Wondo Genet District, Southern Ethiopia. *Journal of Food Science*
- 20 *and Engineering*. 2015;5(2).
- 21
- 22 48. Bhandari S, Sayami JT, Thapa P, et al. Dietary intake patterns and nutritional status of
- 23 women of reproductive age in Nepal: findings from a health survey. *Archives of Public*
- 24 *Health* 2016;74(2): DOI 10.1186/s13690-016-0114-3.
- 25
- 26 49. Siddiqui MZ, Goli S, Reja T, et al. Prevalence of Anemia and Its Determinants Among
- 27 Pregnant, Lactating, and Nonpregnant Nonlactating Women in India. *SAGE Open*.
- 28 2017;1 –10 DOI: .1177/2158244017725555.
- 29
- 30 50. Soofi S, Khan GN, Sadiq K, et al. Prevalence and possible factors associated with
- 31 anaemia, and vitamin B12 and folate deficiencies in women of reproductive age in
- 32 Pakistan: analysis of national-level secondary survey data. *BMJ Open* 2017;7:e018007
- 33 doi:101136/ bmjopen-2017-018007.
- 34
- 35 51. Habib MA, Soofi SB, Ahmed I, et al. Prevalence and determinants of iron deficiency
- 36 anemia among non-pregnant women of reproductive age in Pakistan. *Asia Pac J Clin*
- 37 *Nutr* 2018;27(1):195-203.
- 38
- 39 52. Beyene A, Hailu T, Faris K, et al. Current state and trends of access to sanitation in
- 40 Ethiopia and the need to revise indicators to monitor progress in the Post-2015 era. *BMC*
- 41 *Public Health* (2015) 15:451 DOI 101186/s12889-015-1804-4.
- 42
- 43 53. Freeman MC, Garn JV, Sclar GD, et al. The impact of sanitation on infectious diseases
- 44 and nutritional status: Systematic Review and meta analysis. *Int J Hygn & Evt Health*.
- 45 2017;220:928-49.
- 46
- 47
- 48
- 49
- 50
- 51
- 52
- 53
- 54
- 55
- 56
- 57
- 58
- 59
- 60

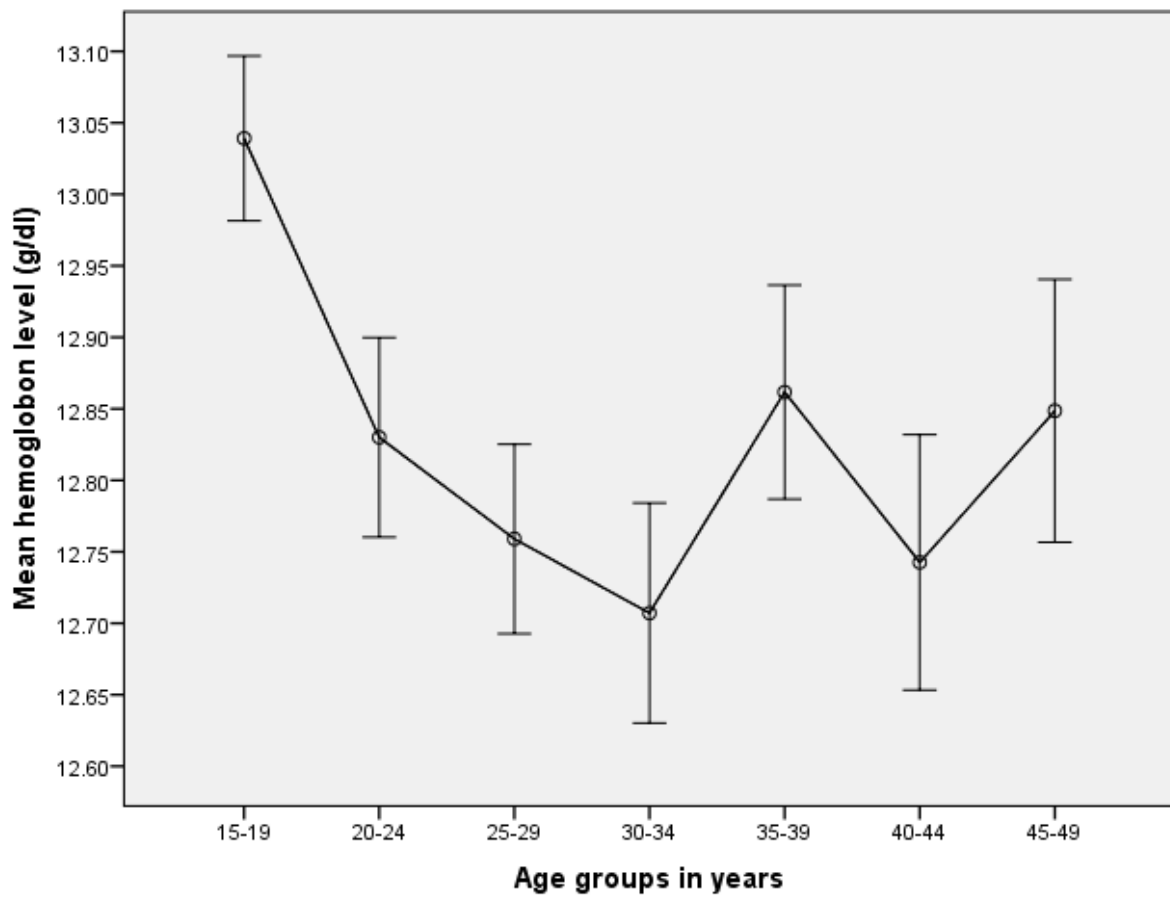

Figure 1: Average hemoglobin value with 95% CI at different age groups, Ethiopia, 2016

1  
2  
3  
4  
5  
6  
7  
8  
9  
10  
11  
12  
13  
14  
15  
16  
17  
18  
19  
20  
21  
22  
23  
24  
25  
26  
27  
28  
29  
30  
31  
32  
33  
34  
35  
36  
37  
38  
39  
40  
41  
42  
43  
44  
45  
46  
47  
48  
49  
50  
51  
52  
53  
54  
55  
56  
57  
58  
59  
60

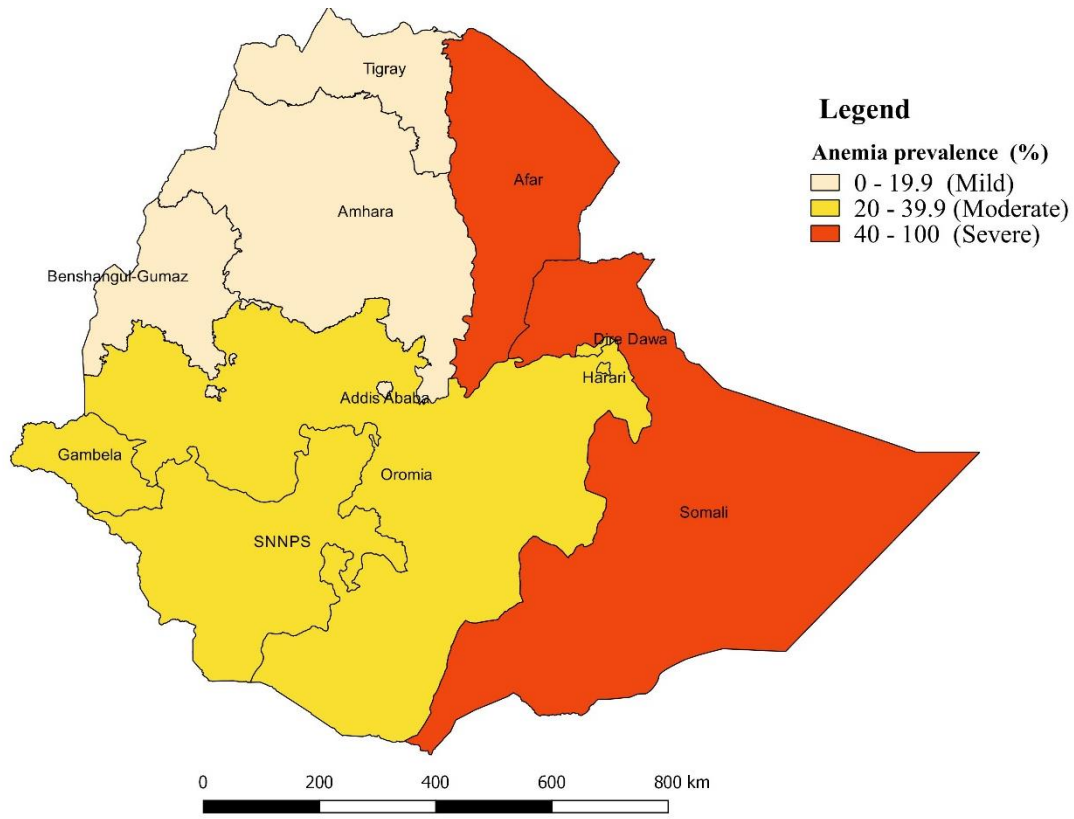

Figure 2. Spatial Empirical Bayesian smoothed (SEBS) percentage of maternal anemia across regions

1  
2  
3  
4  
5  
6  
7  
8  
9  
10  
11  
12  
13  
14  
15  
16  
17  
18  
19  
20  
21  
22  
23  
24  
25  
26  
27  
28  
29  
30  
31  
32  
33  
34  
35  
36  
37  
38  
39  
40  
41  
42  
43  
44  
45  
46  
47  
48  
49  
50  
51  
52  
53  
54  
55  
56  
57  
58  
59  
60

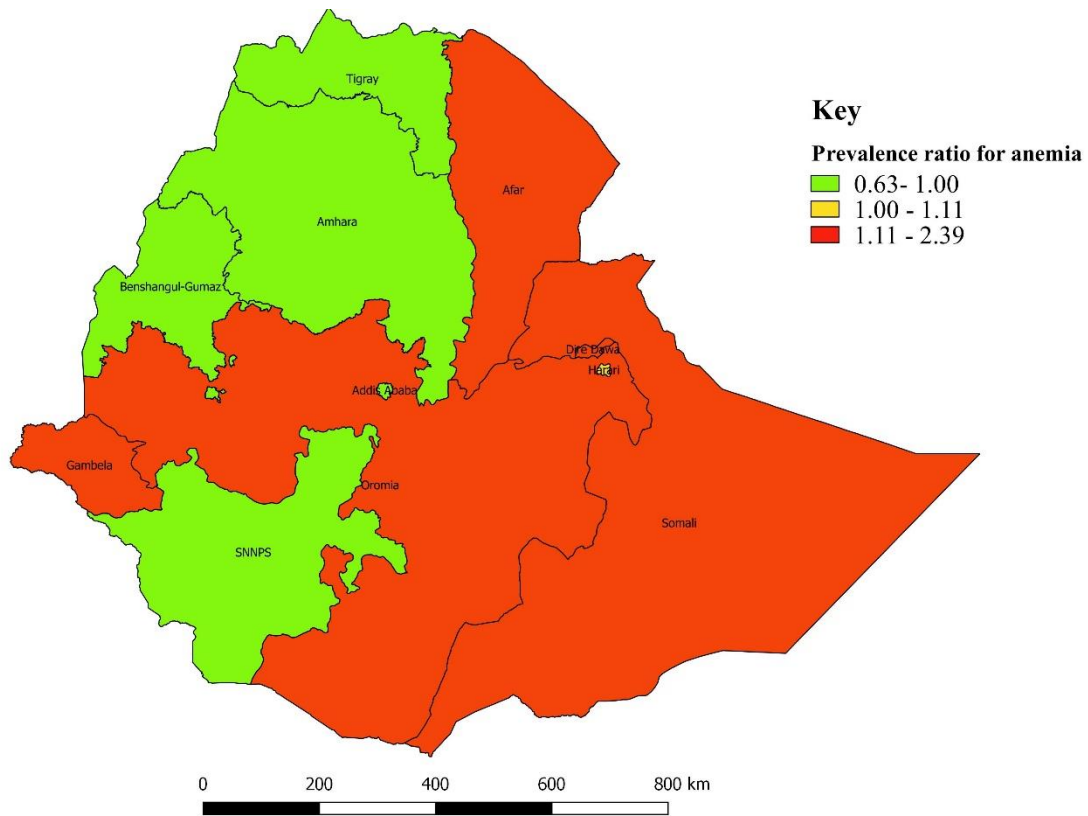

Figure 3. Standardized prevalence ratio for anemia among women of reproductive age across the regions in Ethiopia (standardized to national prevalence of 23.6%).

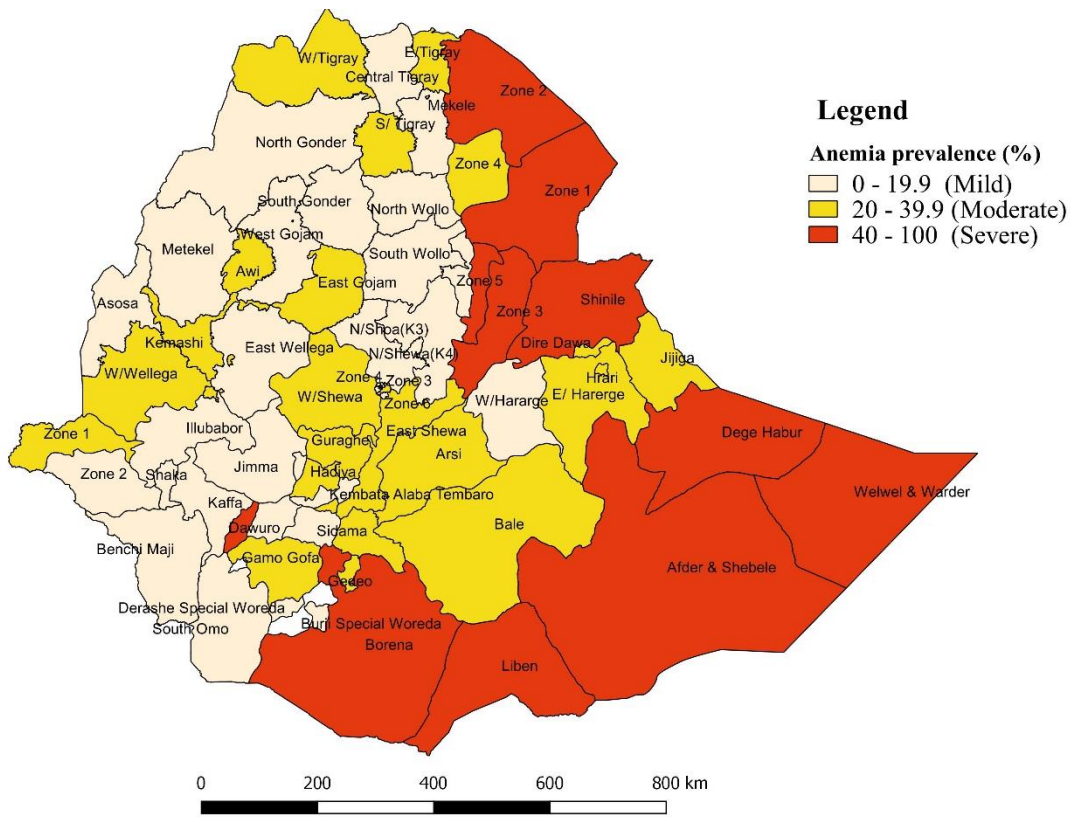

Figure 4 Spatial Empirical Bayesian smoothed (SEBS) percentage of maternal anemia across Zones

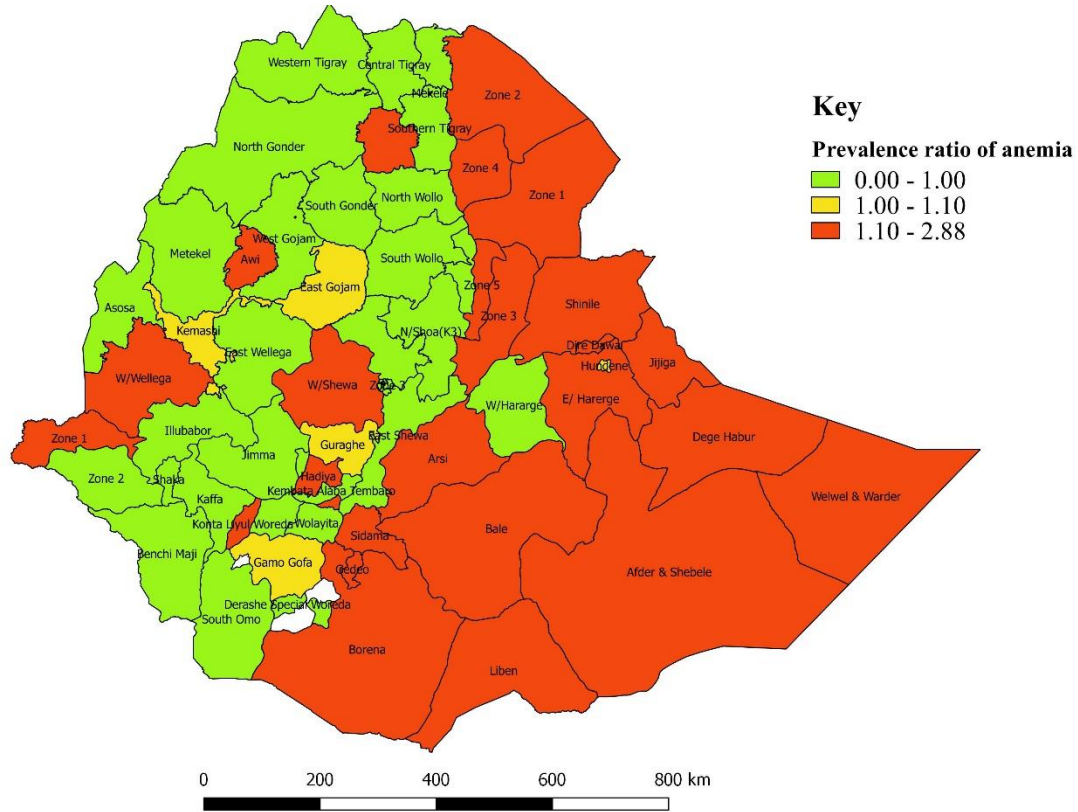

Figure 5. Standardized prevalence ratio for anemia among women of reproductive age across Zones in Ethiopia (standardized to national prevalence of 23.6%).



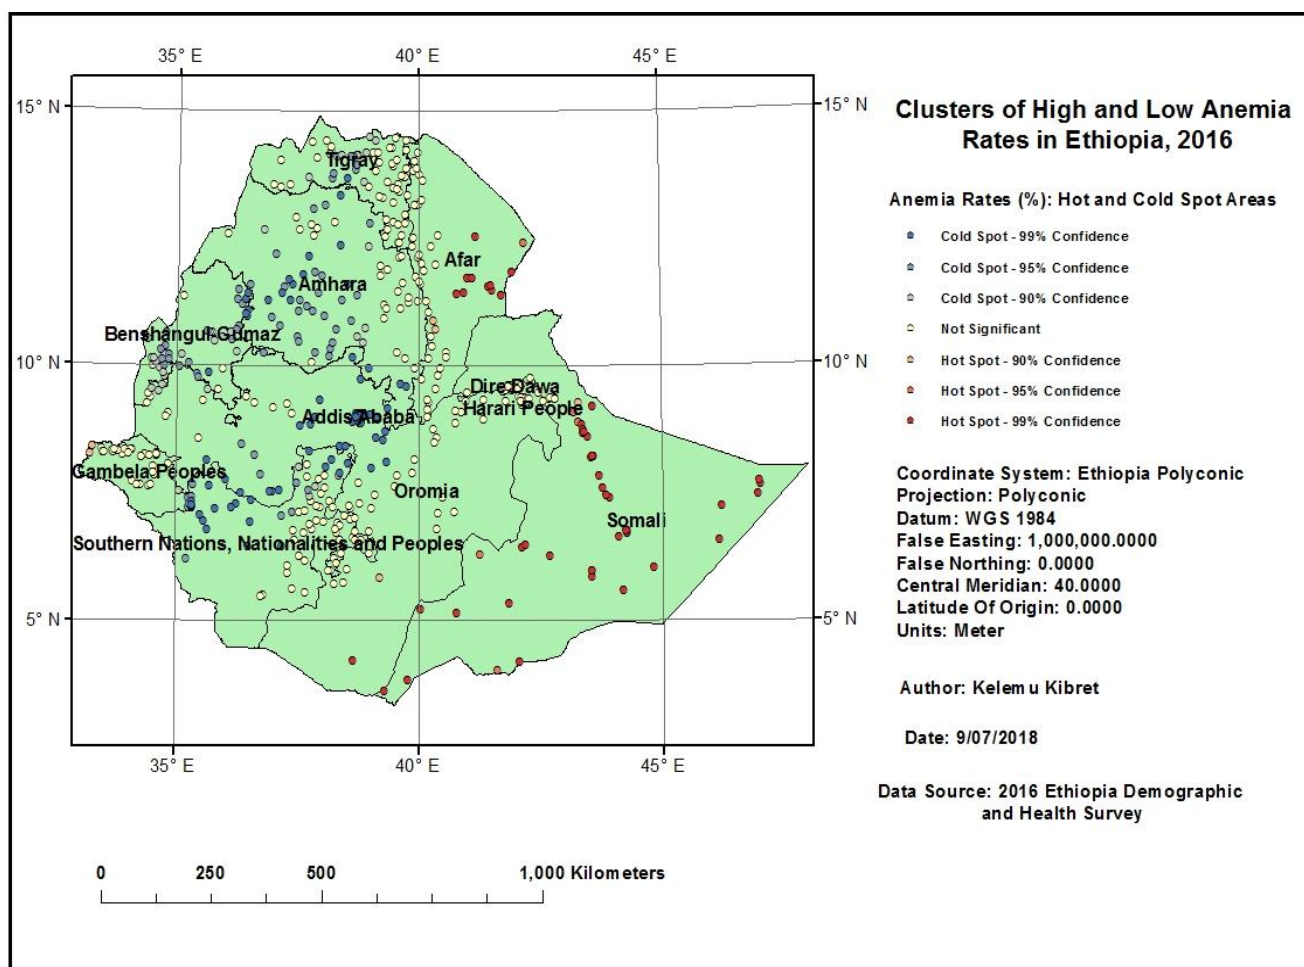

36  
37  
38  
39  
40  
41  
42  
43  
44  
45  
46  
47  
48  
49  
50  
51  
52  
53  
54  
55  
56  
57  
58  
59  
60

Figure 6. Spatial pattern of hot spots and cold spots of maternal anemia rate at cluster level in Ethiopia, EDHS, 2016.

# BMJ Open

## The Spatial Distribution and Determinant Factors of Anemia among Women of Reproductive Age in Ethiopia: A Multilevel and Spatial Analysis

|                                 |                                                                                                                                                                                                                                                                                                                                                                                                                                                                                                                              |
|---------------------------------|------------------------------------------------------------------------------------------------------------------------------------------------------------------------------------------------------------------------------------------------------------------------------------------------------------------------------------------------------------------------------------------------------------------------------------------------------------------------------------------------------------------------------|
| Journal:                        | <i>BMJ Open</i>                                                                                                                                                                                                                                                                                                                                                                                                                                                                                                              |
| Manuscript ID                   | bmjopen-2018-027276.R1                                                                                                                                                                                                                                                                                                                                                                                                                                                                                                       |
| Article Type:                   | Research                                                                                                                                                                                                                                                                                                                                                                                                                                                                                                                     |
| Date Submitted by the Author:   | 17-Dec-2018                                                                                                                                                                                                                                                                                                                                                                                                                                                                                                                  |
| Complete List of Authors:       | Kibret, Kelemu; University of Newcastle, Priority Research Center for Generational Health and Aging, School of Medicine & Public Health Chojenta, Catherine; The University of Newcastle Australia, Priority Research Centre for Generational Health and Ageing, School of Medicine and Public Health<br>Gresham, Eliie; Western New South Wales Local Health District, Health Intelligence Unit<br>Loxton, Deborah; University of Newcastle, Research Centre for Gender Health & Ageing, School of Medicine & Public Health |
| <b>Primary Subject Heading</b>: | Epidemiology                                                                                                                                                                                                                                                                                                                                                                                                                                                                                                                 |
| Secondary Subject Heading:      | Public health                                                                                                                                                                                                                                                                                                                                                                                                                                                                                                                |
| Keywords:                       | Anemia, spatial analysis, multilevel analysis, reproductive age women, women                                                                                                                                                                                                                                                                                                                                                                                                                                                 |
|                                 |                                                                                                                                                                                                                                                                                                                                                                                                                                                                                                                              |

SCHOLARONE™  
Manuscripts

1  
2  
3 **The Spatial Distribution and Determinant Factors of Anemia among Women of**  
4 **Reproductive Age in Ethiopia: A Multilevel and Spatial Analysis**

5  
6 Kelemu Tilahun Kibret<sup>1\*</sup>, Catherine Chojenta<sup>1</sup>, Ellie Gresham<sup>2</sup>, Deborah Loxton<sup>1</sup>  
7  
8

9 <sup>1</sup>Priority Research Centre for Generational Health and Ageing, School of Medicine and Public  
10 Health, University of Newcastle, Australia.  
11

12 <sup>2</sup>Health Intelligence Unit, Western NSW Local Health District, Australia  
13

14 \*Corresponding author: Kelemu Tilahun email [ktwu27@gmail.com](mailto:ktwu27@gmail.com) phone +61415649254  
15  
16  
17  
18  
19  
20  
21  
22  
23  
24  
25  
26  
27  
28  
29  
30  
31  
32  
33  
34  
35  
36  
37  
38  
39  
40  
41  
42  
43  
44  
45  
46  
47  
48  
49  
50  
51  
52  
53  
54  
55  
56  
57  
58  
59  
60

For peer review only

## Abstract

**Objective:** The aim of this study was to assess the spatial distribution and determinant factors of anemia among reproductive age women in Ethiopia.

**Methods:** An in depth analysis of the 2016 Ethiopian Demographic and Health Survey data was undertaken. Getis-Ord  $G_i^*$  statistics were used to identify the hot and cold spot areas for maternal anemia. A multilevel logistic regression model was used to identify independent predictors of maternal anemia.

**Results:** Older age (adjusted odds ratio (AOR) = 0.75; 0.64, 0.96)), no education (AOR = 1.37; 95 % CI: 1.102–1.72), lowest wealth quantile (AOR = 1.29; 95 % CI: 1.014-1.60), currently pregnant (AOR=1.28; 95% CI: 1.10, 1.51, currently breastfeeding (AOR =1.09; 95% CI: 1.025, 1.28), high gravidity (AOR=1.39; 95% CI: 1.13, 1.69), and HIV positive (AOR= 2.11; 95% CI: 1.59, 2.79) are individual factors associated with the occurrence of anemia. Likewise, living in a rural area (AOR=1.29; 95%CI: 1.02, 1.63), and availability of unimproved latrine facilities (AOR = 1.18; 95 % CI: 1.01, 1.39) are community level factors associated with higher odds of anemia. The spatial analysis indicated that statistically high hotspots of anemia were observed in the eastern (Somali, Dire Dawa and Harari regions) and north-eastern (Afar) parts of the country.

**Conclusion:** The prevalence rate of anemia among women of reproductive age is varied across the country. Significantly hotspots /high prevalence of anemia was observed in the eastern and north-eastern parts of Ethiopia. Anemia prevention strategies need to be targeted on rural residents, women with limited to no education, women who are breastfeeding, areas with poor latrine facilities and women who are HIV positive.

Key words: Anemia, spatial analysis, multilevel analysis, reproductive age women, women

### Strength and limitation of this study

- Used large population-based data with a large sample size, which is representative of all regions of the country
- A combination of statistical methods (spatial analysis and multilevel logistics analysis) were applied which allows understanding of the role of contextual and geographical factors in the occurrence of anemia among women of reproductive age
- The cause effect and temporal relationship could not be established due to the cross sectional nature of the data
- Unable to incorporate essential factors such as dietary intake and behavioral factors in the analysis

## Introduction

Anemia refers to a low hemoglobin level (<11mg/dl for pregnant women and <12mg/dl for non-pregnant women) [1]. If an individual's hemoglobin level is low, the red blood cells are unable to carry adequate oxygen for the body's physiologic needs [1]. Consequently, a low hemoglobin level can adversely affect women's health in the following ways: maternal mortality and severe morbidity [2], depression [3, 4], raised blood pressure [5, 6], as well as low birth weight and preterm birth [7].

Anemia is a major public health problem in women and children under five years of age [8]. Worldwide, 38% of pregnant women, and 29% of non-pregnant women were anemic in 2011 [8]. Pregnant women in low and middle income countries (LMIC) experience high rates of anemia, in which the highest prevalence rates are reported in Central and West Africa (56%), South Asia (52%) and East Africa (36%) [8]. Similarly, a large proportion of non-pregnant women were reportedly anemic in West and Central Africa (48%), South Asia (47%) and East Africa (28%) [8]. Thus, anaemia remains one of the global health priority areas at the global level, particularly in resource-limited settings [9]. Reducing anemia is considered as an essential part of improving the health of women, and the World Health Organization (WHO) has set a global target of 50% reduction of anemia among women of reproductive age by 2025 [10].

Anemia is also a common problem in Ethiopia; the recent Ethiopian Demographic Health Survey (EDHS 2016) reported 29% prevalence of anemia among pregnant women and 24% among women of reproductive age; the figure ranging from 16% to 59% across different parts of the country [11]. Likewise, in several pocket studies from different parts of the country researchers reported varied anemia prevalence rates among pregnant women, which ranged from 17% in the north. [12], 32% in the south [13] and up to 44% [14] and 57% [15] in the eastern part of Ethiopia. Similarly, in different studies there was reported to be a 16% [16] prevalence of anemia among non-pregnant women and 29% [17] and 30% [18, 19] among women of reproductive age.

Different factors are responsible for anemia, even though iron deficiency is the main cause of the disease [20]. Other micronutrients (vitamin A, vitamin B12, and folate), chronic bleeding, acute or chronic infections and parasitic infections (hookworm and malaria) are also known to cause anemia [16, 21-23]. Based on the geographic and disease situation in LMIC, about half of anemia cases are attributable to a deficiency of iron and the remainder may be due to

1  
2  
3 diseases like parasitic infections, malaria and Human Immune Deficiency Virus (HIV) [24]. In  
4 a systematic review, it was revealed that the proportion of anemia caused by iron deficiency  
5 was below 50% in LMIC, with regional variations, poor sanitary conditions and subsequent  
6 increased occurrence of infections also leading to anemia [25].  
7  
8  
9

10 In Ethiopia, varied prevalence rates of maternal anemia have been observed with different  
11 factors across different parts of the country [12, 15]. For instance, large family size, low  
12 education status, rural residence, hookworm infestation and HIV infection were identified as  
13 factors of anemia in northern Ethiopia [12, 26], while in studies from the eastern area it was  
14 reported that multigravidas, third trimester of pregnancy and intestinal infestation were factors  
15 for anemia during pregnancy [14, 27]. The variation in rates of anemia among women in  
16 Ethiopia might be due to the presence of diverse contextual and geographically variable factors  
17 including diet and the incidence of communicable diseases [9].  
18  
19  
20  
21  
22  
23  
24

25 To date, spatial analyses have not been conducted to identify areas with hotspots (high  
26 prevalence rates) of maternal anemia in Ethiopia. Assessing the geographic distributions of  
27 anemia and the impact of risk factors on disease prevalence by area is important to prioritize  
28 and design targeted prevention and intervention programmes to address maternal anemia [28].  
29 In addition, the burden of anemia has been used as a measureable indicator of soil transmitted-  
30 helminthiasis, so understanding the geographical distribution of anemia can help target  
31 prevention and control mechanisms for parasitic infections such as these [29].  
32  
33  
34  
35  
36  
37

38 Thus, the aims of this study were to assess the spatial distribution and determinant factors of  
39 anemia among women of reproductive age women in Ethiopia.  
40  
41

## 42 **Methods**

### 43 **Patient and Public Involvement**

44 As this study used the publicly available data set, no patients or members of the public were  
45 involved. The participants of this study were women of reproductive age (15-49). The mean  
46 ( $\pm$  standard deviation (sd)) age of the respondents was 28.2 years ( $\pm$ 9.2 years). The majority  
47 (78%) of the participants were rural residents and nearly two thirds (66%) were married or  
48 living with a partner. Almost half (48%) of the participants had no formal education.  
49  
50  
51  
52  
53  
54

### 55 **Study design and setting**

56 An in depth analysis of the EDHS 2016 data was undertaken for this study. EDHS 2016 was a  
57 population based cross sectional study conducted across the country. It is the fourth national  
58  
59  
60

1  
2  
3 survey conducted in all parts of Ethiopia (in nine regional states (Tigray, Afar, Amhara,  
4 Oromia, Somali, Benishangul-Gumuz, Southern Nations, Nationalities and Peoples' Region  
5 (SNNP), Gambella and Harari) and two city administrations (Addis Ababa and Dire Dawa))  
6 [11]. In Ethiopia the states are administratively further subdivided into Zones, Zones into  
7 *Woredas* and *Woredas* further into the lowest unit called *Kebeles*.  
8  
9

### 10 **Sampling and data measurements**

11  
12 In the 2016 EDHS, stratified and cluster multistage sampling was used and it was intended to  
13 have appropriate demographic and health indicators at nationwide and regional states. In the  
14 first stage, 645 clusters of enumeration areas (EAs) (202 urban and 443 rural) were identified  
15 using probability proportional to the size of EAs. In the second stage, a random sample of  
16 18,008 households was selected from all the identified EAs. A total of 15,683 women aged  
17 15-49 years were interviewed and haemoglobin levels were measured for 14,923 of them [11]  
18 (Figure 1). Data collection took place from January 18, 2016, to June 27, 2016.  
19  
20  
21  
22  
23  
24  
25  
26  
27  
28

29 The sample size for EDHS was determined based on the multistage sampling procedure, taking  
30 into consideration the sampling variation. Standard errors were computed using the Taylor  
31 linearization method. The design effect, which is the ratio between the standard error with the  
32 given sample design and the standard error that would result if a simple random sample had  
33 been used, was determined [11].  
34  
35  
36  
37

38 Haemoglobin levels of the women were measured using HemoCue, which is the standard test  
39 used in the EDHS 2016, and all haemoglobin values were adjusted for both altitude and  
40 smoking status [11]. Pregnant women with a haemoglobin value <11g/dl and non-pregnant  
41 women with <12g/dl were considered anaemic [1]. Similarly, anemia was classified according  
42 to its severity as severe (hemoglobin value < 7 g/dl), moderate (7.0-9.9 g/dl) in all women and  
43 mild (10.0 – 10.9 g/dl) in pregnant women and (10.0 – 11.9 g/dl) in non-pregnant women [1].  
44  
45  
46  
47  
48

### 49 **Explanatory variables (Determinant factors)**

50 Both individual and community level factors were used. The individual and community level  
51 factors included in this study are presented in Supplemental Table 1 with their definition and  
52 coding. The variables were selected based on the literature review for factors affecting anemia  
53 based on this sociodemographic, maternal as well as community level factors identified as  
54 important factors for the occurrence of anemia. Therefore, all the available variables in the data  
55 set were included for the analysis. Individual factors included were age, religion, marital status,  
56  
57  
58  
59  
60

1  
2  
3 educational status, BMI, birth interval, use of contraceptives, wealth index, family size, iron-  
4 folate intake and gravidity of women, while the community level factors were residence (urban,  
5 rural), region, water source and latrine facility type. Community level measures could also be  
6 driven by aggregating individual level variables, for example, the proportion of women in the  
7 community who are in the top quantile of wealth index and proportion of women in the  
8 community who have clean water access. Community level factors describe the group of  
9 populations living in similar settings.

10  
11  
12 The assumption of independence of observation has been taken as a basis to determine which  
13 variables are analysed at individual and community level. If the observations at the individual  
14 level are independent, variables were treated as individual level factors. Whereas, if the  
15 observations were clustered into higher levels of units and if several women have shared  
16 features such as place of residence, types of water source, latrine facility and region that could  
17 have the same effect on maternal anemia in the locality, then variables are analysed at the  
18 community level.

## 31 **Data analysis**

### 32 **Spatial analysis**

33  
34  
35 Spatial analyses were performed using Geoda version 1.8.10, QGIS Version 2.18.0 and Arch  
36 GIS software version 10.1, and base files of the administrative regions for Ethiopia were  
37 obtained from DIVA (diva-gis.org). The spatial analysis was conducted by joining the  
38 occurrence of anemia (as proportions) with each cluster to the corresponding geospatial  
39 location (survey cluster values). The values of DHS data were merged with the GPS dataset in  
40 Geoda software and these values were imported into the QGIS software. Anemia proportions  
41 were then computed at lower (cluster), zonal and regional levels using QGIS.

42  
43  
44 The spatial pattern of the rate of maternal anemia was visualized and a spatially smoothed  
45 proportion was obtained through empirical Bayes estimation methods [30] The smoothed  
46 proportions present clearer patterns, where the problem was most severe. The spatial empirical  
47 Bayes "smooth" estimates technique was able to deal with spatial heterogeneity. The estimation  
48 technique guarantees that estimates of neighbouring states are more alike than estimates of  
49 states that are further away [31].



1  
2  
3 A standardized prevalence rate (SPR), or the ratio of the observed prevalence rate to a national  
4 prevalence rate, was determined using Geoda software [31]. Geoda implements this in the form  
5 of an excess risk estimate as part of the map. The excess risk rate is the ratio of the observed  
6 rate to the average rate computed for all the data [31].  
7  
8

9  
10 Furthermore, a spatial analysis was performed to identify the clustering of maternal anemia or  
11 hotspot areas (the areas that have higher anemia prevalence rates compared to the national  
12 average) in different regions of Ethiopia. Spatial analysis is an epidemiological method useful  
13 to specify geographic areas with high or low rates of disease occurrence and variability over  
14 the region or country [32]. Getis-Ord  $G_i^*$  statistics was used for this spatial analysis. Local  
15 Getis-Ord  $G_i^*$  statistics [33] are important to identify the hot and cold spot areas for maternal  
16 anemia using geographic poisoning system (GPS) latitude and longitude coordinate readings  
17 which were taken at the nearest community centre for EAs or EDHS 2016 clusters [11]. An  
18 anemia hotspot refers to the occurrence of high prevalence rates of anemia clustered together  
19 on the map, whereas cold spots refers to the occurrence of low prevalence rates of anemia  
20 clustered together on the map [33].  
21  
22  
23  
24  
25  
26  
27  
28

29  
30 A local Getis-Ord G-statistic tool in ArcGIS was used to calculate the spatial variability of high  
31 and low prevalence rates of maternal anemia. An autocorrelation can be classified into positive  
32 and negative correlation through the Local Getis-Ord G statistics [33]. Positive autocorrelation  
33 occurs when similar values clustered together on a map (high rates surrounded by nearby high  
34 rates or low rates surrounded by nearby low rates). Negative autocorrelation indicates different  
35 values clustered together on a map, that is, high values surrounded by nearby low values or low  
36 values surrounded by nearby high values. Statistical significance of autocorrelation was  
37 determined by z-scores and p-value with a 95 % level of confidence. The distribution and  
38 variations of maternal anemia prevalence rates across the country were displayed on the map.  
39  
40  
41  
42  
43  
44

#### 45 **Statistical analysis**

46  
47 The descriptive statistical analysis was performed using SPSS software version 24.0  
48 ([www.spss.com](http://www.spss.com)) by complex sample analysis. Frequencies, percentage, and standard deviation  
49 were used for the descriptive analysis. Since some regions with small populations were  
50 oversampled, while others with large population were underrepresented, the weighted  
51 frequencies and percentages (based on population size of each region) were computed as a  
52 correction. The detailed weighting procedure was described in EDHS 2016 report [11]. The  
53 mean and standard deviation were computed for blood hemoglobin level. The mean  
54  
55  
56  
57  
58  
59  
60

hemoglobin value was also compared across different independent categorical variables using One-way Analysis of Variance (ANOVA) or independent t-test.

**Multilevel logistic regression:** The Multivariable multilevel logistic regression model was used to determine the effect of different factors on maternal anemia. The analysis was performed by using SAS version 9.4 software (SAS North Carolina State University, [www.sas.com](http://www.sas.com)) using Proc Glimmix with Laplace's method. For this multilevel analysis, four models were constructed. The first model was constructed without independent variables to assess the effect of community variation on maternal anemia. Individual level factors were incorporated in the second model. In the third model, community level factors were included. Finally, both individual and community level factors were included in the fourth model.

The results of fixed effects were presented as odds ratio (OR) with 95% confidence intervals (CIs). An adjusted odds ratio (AOR) with 95% CIs was computed to identify the independent factors of maternal anemia and a p-value <0.05 was used as a measure of statistical significance. A multicollinearity test was done in order to rule out a significant correlation between variables. If the values of variance inflation factor (VIF) was lower than 10, then the collinearity problem was considered as less likely. The random effects (variation of effects) were measured by intra-cluster correlation coefficient (ICC) (variance partition coefficient) [34], percentage change in variance (PCV) [35] and median odds ratio (MOR) [34, 36] which measure the variability between clusters in the multi-level models. ICC explains the cluster variability while MOR can quantify unexplained cluster variability (heterogeneity). MOR translates cluster variance into OR scale. In the multilevel model, PCV can measure the total variation due to factors at the community and individual level [35]. The ICC, PCV and MOR were determined using the estimated variance of clusters utilising the following formula [34, 35].

$$ICC = \frac{V}{(V + \frac{\pi^2}{3})} \quad MOR = \exp\sqrt{2 \times V \times 0.6745} \sim \exp(0.95\sqrt{V})$$

Where V is the estimated variance of clusters

And

$$PCV = \frac{(V_A - V_B)}{V_B} \times 100$$

Where  $V_A$  = variance of the initial model;  $V_B$  = variance of the model with more terms

The multilevel analysis model is one of the analysis methods which can correctly handle the correlated data [37]. A multilevel model evaluates how factors at different levels affect the dependent variable. A multilevel model provides correct parameter estimates by correcting the biases introduced from clustering by producing correct standard errors, thus producing correct CI, and significance tests [37]

### **Ethical consideration**

Publicly available EDHS 2016 data was used for this study. The EDHS 2016 was approved by the National Research Ethics Review Committee (NRERC) of Ethiopia and ICF Macro International. MEASURE DHS approval was obtained to use EDHS 2016. Informed consent was taken from each participant and all identifiers were removed. This analysis was approved by the University of Newcastle Human Research Ethics Committee (approval reference number H-2018-0045).

### **Results**

#### **Sociodemographic characteristics**

The data on 14,923 women were included in this analysis, including 642 clusters nested in 11 regions. The descriptive statistics of the study participants are presented in Table 1. The mean ( $\pm$  sd) age of the respondents was 28.2 years ( $\pm$ 9.2 years). Most of the participants lived in a rural area (78%). Nearly two-thirds (66%) of participants were married or living with a partner. Almost half (48%) of the women had no formal education and around 43% were of the Orthodox Tewahdo Christian religion. Only 18% of the households had access to a piped water source for drinking, and 15% had access to an improved latrine facility. Nearly one-third ( $n=4,657$ ; 31.2%) of women were breastfeeding at the time of the survey (Table 1). The average haemoglobin level among lactating mothers was 12.6 g/dl ( $\pm$ 1.7 g/dl) and about 28.3% (95% CI: 25.7-31.0%) of these women were anemic.

Table 1: Sociodemographic and other health-related characteristics of study participants included in the analysis, EDHS 2016 (N=14,923)

| <b>Variables</b> | <b>Weighted<br/>Frequency</b> | <b>Weighted<br/>percent</b> |
|------------------|-------------------------------|-----------------------------|
| Age              |                               |                             |
| 15-19            | 3165                          | 21.2                        |

|                            |       |      |
|----------------------------|-------|------|
| 20-29                      | 5467  | 36.6 |
| 30-39                      | 4078  | 27.3 |
| 40-49                      | 2213  | 14.8 |
| Place of residence         |       |      |
| Urban                      | 3169  | 21.2 |
| Rural                      | 11754 | 78.8 |
| Educational status         |       |      |
| No education               | 7215  | 48.3 |
| Primary                    | 5244  | 35.1 |
| Secondary                  | 1676  | 11.2 |
| Higher                     | 789   | 5.3  |
| Marital status             |       |      |
| Single                     | 3758  | 25.2 |
| Married                    | 9800  | 65.7 |
| Divorced/widowed/separated | 1365  | 9.1  |
| Religion                   |       |      |
| Orthodox                   | 6447  | 43.2 |
| Protestant                 | 3514  | 23.5 |
| Muslim                     | 4645  | 31.1 |
| Other                      | 317   | 2.1  |
| Region                     |       |      |
| Tigray                     | 1073  | 7.2  |
| Afar                       | 119   | 0.8  |
| Amhara                     | 3645  | 24.4 |
| Oromia                     | 5422  | 36.3 |
| Somali                     | 417   | 2.8  |
| Benishangul-Gumuz          | 146   | 1.0  |
| SNNPR                      | 3124  | 20.9 |
| Gambella                   | 42    | 0.3  |
| Harari                     | 32    | 0.2  |
| Addis Ababa                | 825   | 5.5  |
| Dire Dawa                  | 77    | 0.5  |
| Wealth index               |       |      |

|                                                       |       |      |
|-------------------------------------------------------|-------|------|
| Poorest                                               | 2519  | 16.9 |
| Poorer                                                | 2717  | 18.2 |
| Middle                                                | 2891  | 19.4 |
| Richer                                                | 2979  | 20.0 |
| Richest                                               | 3816  | 25.6 |
| <b>BMI</b>                                            |       |      |
| <18.5                                                 | 3060  | 22.1 |
| 18.5-24.9                                             | 9740  | 70.5 |
| >=25                                                  | 1018  | 7.4  |
| <b>Birth interval</b>                                 |       |      |
| < 24 months                                           | 1415  | 18.3 |
| >= 24 months                                          | 6305  | 81.7 |
| <b>Current use of contraceptives</b>                  |       |      |
| Yes                                                   | 1088  | 7.3  |
| No                                                    | 13835 | 92.7 |
| <b>Iron folate intake during pregnancy (n = 7328)</b> |       |      |
| Yes                                                   | 3108  | 42.4 |
| No /don't know                                        | 4220  | 57.6 |
| <b>Gravidity of women (children ever born)</b>        |       |      |
| 0                                                     | 4745  | 31.8 |
| 1-3                                                   | 4715  | 31.6 |
| 4+                                                    | 5464  | 36.6 |
| <b>Children ever born in the preceding 5 years</b>    |       |      |
| 0                                                     | 7595  | 50.9 |
| 1                                                     | 4475  | 30.0 |
| 2+                                                    | 2852  | 19.1 |
| <b>Currently breastfeeding</b>                        |       |      |
| Yes                                                   | 4657  | 31.2 |
| No                                                    | 10266 | 68.8 |
| <b>Currently pregnant</b>                             |       |      |
| Yes                                                   | 1088  | 7.3  |
| No                                                    | 13835 | 92.7 |
| <b>Smoking</b>                                        |       |      |

|                                                                                        |             |      |
|----------------------------------------------------------------------------------------|-------------|------|
| Yes                                                                                    | 96          | 0.6  |
| No                                                                                     | 14827       | 99.4 |
| Birth in the last year                                                                 |             |      |
| 0                                                                                      | 12474       | 83.6 |
| 1-2                                                                                    | 2449        | 16.4 |
| HIV test                                                                               |             |      |
| Positive                                                                               | 187         | 1.3  |
| Negative                                                                               | 14724       | 98.7 |
| Water source                                                                           |             |      |
| Piped water                                                                            | 2646        | 17.7 |
| Other improved                                                                         | 6926        | 46.4 |
| Unimproved                                                                             | 5351        | 35.9 |
| Latrine facility type                                                                  |             |      |
| Improved toilet                                                                        | 2231        | 14.9 |
| Unimproved toilet                                                                      | 7877        | 52.8 |
| Open defecation                                                                        | 4414        | 29.6 |
| Other                                                                                  | 401         | 2.7  |
| Anemia status                                                                          |             |      |
| Anemic                                                                                 | 3527        | 23.6 |
| Non-anemic                                                                             | 11396       | 76.4 |
| Proportion of women in the community who have clean water source , m(se)               | 64.1 (33.6) |      |
| Proportion of women in the community who have unimproved latrine facility; m(se)       | 85.1(25.0)  |      |
| Proportion of women in the community who are in lowest quantile of wealth index; m(se) | 35.1(30.0)  |      |
| Percentage of unimproved water per cluster; m(se)                                      | 35.9 (33.6) |      |

BMI= Body mass index; SNNP= Southern Nations, Nationalities and Peoples' Region; m= mean; se= standard error

### Prevalence rate of maternal anemia

Amongst all respondents, the mean ( $\pm$ sd) blood hemoglobin level (adjusted for altitude) was 12.8 g/dl ( $\pm$ 1.7 g/dl). The overall prevalence of anemia among women of reproductive age across the country was 23.6% (95% CI: 22.0, 25.3). The prevalence of mild, moderate and severe anemia among all women of reproductive age were 17.8% (95% CI: 16.7-19), 5.0% (95% CI: 4.3-5.8) and 0.8% (95% CI: 0.5-1.2) respectively. There was regional variation in anemia prevalence among women of reproductive age ( $p=0.0001$ ) and higher prevalence rates observed in Afar, Somali, Gambella, Dire Dawa and Oromia regions. Lower prevalence of anemia was observed in Addis Ababa, Tigray, and Amhara regions. Rural areas had a higher prevalence, 25.4 (95% CI: 23.5, 27.4) of maternal anemia than urban areas, 17.0 (95% CI: 14.4, 20.0) ( $p=0.0001$ ). The highest proportion of maternal anemia were found in Somali Regional States, while the lowest proportions were found in Addis Ababa city administration (Table 2).

Table 2: The variation of anaemia prevalence rates across different regions and different sociodemographic characteristics of women in Ethiopia, 2016

| Region             | Weighted frequency |            | Weighted proportion of anemia (95% CI) | p-value |
|--------------------|--------------------|------------|----------------------------------------|---------|
|                    | Anemic             | Non-anemic |                                        |         |
| Place of residence |                    |            |                                        |         |
| Urban              | 538                | 2630       | 17.0 (14.4,20.0)                       | 0.0001  |
| Rural              | 2989               | 8766       | 25.4 (23.5, 27.4)                      |         |
| Region             |                    |            |                                        |         |
| Tigray             | 212                | 861        | 19.7 (16.8,23.0)                       | 0.0001  |
| Afar               | 53                 | 66         | 44.7 (39.9,49.6)                       |         |
| Amhara             | 627                | 3019       | 17.2 (14.9,19.7)                       |         |
| Oromia             | 1480               | 3942       | 27.2 (23.8,31.1)                       |         |
| Somali             | 248                | 169        | 59.5 (55.2,63.7)                       |         |
| Benishangul-Gumuz  | 28                 | 118        | 19.2 (16.1,22.7)                       |         |

|                         |      |       |                   |        |
|-------------------------|------|-------|-------------------|--------|
| SNNP                    | 704  | 2420  | 22.5 (19.4,26.0)  |        |
| Gambella                | 11   | 31    | 26.1 (21.3,31.5)  |        |
| Harari                  | 9    | 23    | 27.7 (23.7,32.1)  |        |
| Addis Ababa             | 132  | 693   | 16 (13.5,18.8)    |        |
| Dire Dawa               | 23   | 54    | 30 (25.8,34.8)    |        |
| Education status        |      |       |                   |        |
| No education            | 2002 | 5212  | 27.8 (25.4,30.2)  | 0.0001 |
| Primary                 | 1136 | 4108  | 21.7(19.8,23.7)   |        |
| Secondary               | 297  | 1378  | 17.8 (14.9,21.0)  |        |
| Higher                  | 91   | 697   | 11.5(8.2,16.0)    |        |
| Wealth index            |      |       |                   |        |
| Poorest                 | 863  | 1656  | 34.3(29.7,39.1)   | 0.0001 |
| Poorer                  | 688  | 2028  | 25.3(22.6,28.3)   |        |
| Middle                  | 686  | 2205  | 23.7(21.2,26.5)   |        |
| Richer                  | 625  | 2354  | 21.0(18.6,23.6)   |        |
| Richest                 | 664  | 3152  | 17.4(15.1,19.9)   |        |
| Currently pregnant      |      |       |                   |        |
| Yes                     | 317  | 771   | 29.1 (24.9,33.7)  | 0.003  |
| No                      | 3210 | 10625 | 23.2 (21.6,24.9)  |        |
| Currently breastfeeding |      |       |                   |        |
| Yes                     | 1317 | 3340  | 28.3 (25.7,31.0)  | 0.0001 |
| No                      | 2210 | 8055  | 21.5 (20.0,23.2)  |        |
| Total                   | 3527 | 11396 | 23.6 (22.0, 25.3) |        |

Around 1,080 [7.3% (95% CI: 6.6, 8.1)] participants were pregnant at the time of the interview. The mean hemoglobin level among pregnant women was 11.7 g/dl ( $\pm 1.8$  g/dl) and 29.1% (95% CI: 24.9-33.7) of these women were anemic. The prevalence of anemia was higher among pregnant women, 29.1 (95% CI: 24.9, 33.7) than non-pregnant women, 23.2 (95% CI: 21.6, 24.9) ( $p = 0.003$ ) (Table 2). The mean hemoglobin value of women in their second and third trimester was significantly lower compared to women in their first trimester ( $p = 0.001$ ). The mean hemoglobin levels in pregnant women who had less than a 24 month birth interval (for their most recent birth) was significantly lower compared to women who had a birth interval



of less than or equal to 24 months ( $p= 0.0001$ ). Similarly receiving Iron folate supplements during pregnancy improved the mean haemoglobin values in pregnant women (Table 3).

Table 3: Hemoglobin level among pregnant women in Ethiopia, 2016

| Variables                 | Number | Hemoglobin level (g/dl) (mean(sd)) | P values of ANOVA or independent t test |
|---------------------------|--------|------------------------------------|-----------------------------------------|
| Children ever born (CEB)  | 1,088  |                                    | 0.0001                                  |
| 0                         | 213    | 12.1(1.7)                          |                                         |
| 1-3                       | 484    | 11.7(1.8)                          |                                         |
| 4+                        | 390    | 11.5 (1.8)                         |                                         |
| Pregnancy stage           | 1,088  |                                    | 0.0001                                  |
| 1 <sup>st</sup> trimester | 226    | 12.4 (1.7)                         |                                         |
| 2 <sup>nd</sup> trimester | 433    | 11.6 (1.6)                         |                                         |
| 3 <sup>rd</sup> trimester | 429    | 11.5 (1.9)                         |                                         |
| CEB in last 5 years       | 1,088  |                                    | 0.0001                                  |
| 0                         | 339    | 12.1 (1.7)                         |                                         |
| 1                         | 484    | 11.7 (1.8)                         |                                         |
| 2+                        | 265    | 11.4 (1.9)                         |                                         |
| Fe-Fol supplementation    | 749    |                                    | 0.018                                   |
| Yes                       | 251    | 11.8 (1.5)                         |                                         |
| No                        | 498    | 11.5 (1.9)                         |                                         |
| Birth interval            | 702    |                                    | 0.0001                                  |
| < 24 months               | 206    | 11.2 (2.0)                         |                                         |
| $\geq$ 24 months          | 497    | 11.9 (1.5)                         |                                         |

sd = standard deviation, Fe-Fol= Iron-folate, CEB = Children Ever Born

### Determinate factors of maternal anemia

#### Multilevel Analysis (Fixed effect analysis)

1  
2  
3 The results of multilevel logistic regression for the individual and community level variables  
4 are presented in Table 4. In the full model in which all individual and community level factors  
5 are included, residence, education, religion, wealth index, pregnancy and breastfeeding status,  
6  
7  
8  
9  
10  
11  
12  
13  
14  
15  
16  
17  
18  
19  
20  
21  
22  
23  
24  
25  
26  
27  
28  
29  
30  
31  
32  
33  
34  
35  
36  
37  
38  
39  
40  
41  
42  
43  
44  
45  
46  
47  
48  
49  
50  
51  
52  
53  
54  
55  
56  
57  
58  
59  
60

The results of multilevel logistic regression for the individual and community level variables are presented in Table 4. In the full model in which all individual and community level factors are included, residence, education, religion, wealth index, pregnancy and breastfeeding status, gravidity of women, and lack of availability of an improved latrine were factors significantly associated with maternal anemia. The results of the multicollinearity test indicated that no collinearity problem existed, since the VIF value of all variables is lower than 10.

### Individual factors

The average hemoglobin value was significantly different across age groups ( $p=0.0001$ ). The highest mean hemoglobin level, 13 g/dl was observed in the youngest (15-19 years) age group while the lowest mean hemoglobin level, 12.71 g/dl, in the 30-34 years age group. The general pattern indicated roughly linear decline among women aged 15-34 years (Figure 2). Women aged 40-49 years old were 25% less likely to be anemic compared to women in the youngest age group (15-19 years old) (AOR= 0.75 (0.64, 0.96). Those women with limited education were 1.37 times more likely to be anemic than women who completed higher education (AOR = 1.37; 95 % CI: 1.102–1.72). The odds of anemia increased by 29% (AOR = 1.29; 95 % CI: 1.014-1.60) when comparing the poorest to the richest women. The odds of anemia were higher in women who were pregnant (AOR=1.28; 95% CI: 1.10, 1.51) compared to those who were not non-pregnant. Women who were currently breastfeeding were 9% (AOR =1.09; 95% CI: 1.025, 1.28) more likely to be anemic. The odds of anemia were 39% higher among mothers who had given birth to four or more children (AOR=1.39; 95% CI: 1.13, 1.69). Women who gave birth to two or more children in the preceding five years of the survey were at higher risk of having anemia (AOR =1.31; 95% CI: 1.09,1.57). In this study, women who were HIV positive had a twofold increased odds of having anemia compared to women classified as HIV negative (AOR= 2.11; 95% CI: 1.59, 2.79) (Table 4).

### Community level factors

Living in a rural area was associated with a 29% higher odds of anemia among women of reproductive age than women who were urban residents (AOR=1.29; 95%CI: 1.02, 1.63). Women from households without access to a latrine had 18% higher odds of anemia compared to women from households that had an improved latrine facility (AOR = 1.18; 95 % CI: 1.01, 1.39). Higher odds of anemia were observed in Somali regional state (AOR = 2.16; 95 % CI: 1.58, 2.90) compared to Dire Dawa. However, the odds of maternal anemia were lower in Gambella, Addis Ababa, Amhara and Oromia region compared to Dire Dawa (Table 4).

### Multilevel analysis (random effect analysis)

The results of the random effects model is shown in Table 4. The results of the random effect shows that the prevalence rate of anemia varied across communities ( $t^2=0.88$ ,  $p=<0.0001$ ). In other words, the anemia prevalence rate was not similarly distributed across the communities. About 21% of the variance in the odds of maternal anemia could be attributed to community level factors, as calculated by the ICC based on estimated intercept component variance. After adjusting for individual and community level factors, the variation in maternal anemia across communities remained statistically significant. About 16% of the odds of maternal anemia variation across communities was observed in the full model (Model 4) (Table 4).

Moreover, the MOR indicated that maternal anemia was attributed to community level factors. The MOR for anemia was 2.44 in the empty model (Model 1); this showed that there was variation between communities (clustering) since MOR was 2.4 times higher than the reference (MOR = 1). The unexplained community variation in maternal anemia decreased to MOR of 2.1 when all factors were added to the null model (empty model). This indicates that when all factors are included, the effect of clustering is still statistically significant in the full model (Table 4).

Table 4: Determinant factors bivariate association between maternal anemia and individual and community contextual characteristics of Ethiopian women, 2016

| Variables                       | Model 1 | Model 2<br>Individual<br>factors | Model 3<br>Community level<br>factors | Model 4<br>Individual +<br>community level<br>factors |
|---------------------------------|---------|----------------------------------|---------------------------------------|-------------------------------------------------------|
| <b>Individual level factors</b> |         |                                  |                                       |                                                       |
| Age                             |         |                                  |                                       |                                                       |
| 15-19                           |         | 1                                |                                       | 1                                                     |
| 20-29                           |         | 0.93 (0.81,1.07)                 |                                       | 0.96 (0.82, 1.19)                                     |
| 30-39                           |         | 0.89 (0.75,1.10)                 |                                       | 0.92 (0.78,1.11)                                      |
| 40-49                           |         | 0.76 (0.61,0.92 )                |                                       | 0.75 (0.64,0.96)                                      |
| Educational status              |         |                                  |                                       |                                                       |
| No education                    |         | 1.41 (1.13,1.76)                 |                                       | 1.37 (1.10, 1.72)                                     |
| Primary                         |         | 1.22 (0.99,1.51)                 |                                       | 1.24 (1.00,1.53)                                      |
| Secondary                       |         | 1.22 (0.98,1.5)                  |                                       | 1.23(0.98,1.52)                                       |
| Higher                          |         | 1                                |                                       | 1                                                     |

|    |                                               |                   |                    |
|----|-----------------------------------------------|-------------------|--------------------|
| 1  |                                               |                   |                    |
| 2  |                                               |                   |                    |
| 3  |                                               |                   |                    |
| 4  | Marital status                                |                   |                    |
| 5  | Single                                        | 0.99 (0.80, 1.22) | 0.972 (0.81,1.22)  |
| 6  | Married                                       | 1.07 (0.92, 1.23) | 1.09 (0.91,1.23)   |
| 7  | Divorced/widowe                               | 1                 | 1                  |
| 8  | d/separated                                   |                   |                    |
| 9  |                                               |                   |                    |
| 10 | Religion                                      |                   |                    |
| 11 | Orthodox                                      | 1                 |                    |
| 12 | Protestant                                    | 1.36 (1.16, 1.58) | 1.37 (1.15,1.63)   |
| 13 | Muslim                                        | 2.04 (1.79, 2.33) | 1.36 (1.16, 1.58)  |
| 14 | Other                                         | 1.49 (1.05, 2.12) | 1.525 (1.06, 2.13) |
| 15 | Wealth index                                  |                   |                    |
| 16 | Poorest                                       | 1.73 (1.48, 2.03) | 1.29 (1.014,1.60)  |
| 17 | Poorer                                        | 1.31 (1.10, 1.54) | 1.21 (0.96,1.45)   |
| 18 | Middle                                        | 1.28 (1.08,1.51)  | 1.22 (0.98,1.50)   |
| 19 | Richer                                        | 1.04 (0.88,1.24)  | 1.01(0.82,1.24)    |
| 20 | Richest                                       | 1                 | 1                  |
| 21 | Current using contraceptives                  |                   |                    |
| 22 | Yes                                           | 0.99 (0.90,1.10)  | 1.0 (0.91,1.11)    |
| 23 | No                                            | 1                 | 1                  |
| 24 | Currently pregnant                            |                   |                    |
| 25 | Yes                                           | 1.30 (1.11,1.52)  | 1.28 (1.10,1.51)   |
| 26 | no                                            | 1                 | 1                  |
| 27 | Currently breastfeeding                       |                   |                    |
| 28 | yes                                           | 1.12 (1.00,1.24)  | 1.09 (1.03,1.28)   |
| 29 | No                                            | 1                 | 1                  |
| 30 | Gravidity of women (total children ever born) |                   |                    |
| 31 | 0                                             | 1                 | 1                  |
| 32 | 1-3                                           | 1.23 (1.03,1.46)  | 1.22 (1.02,1.44)   |
| 33 | 4+                                            | 1.40 (1.15,1.72)  | 1.39 (1.13,1.69)   |
| 34 | Smoking                                       |                   |                    |
| 35 | Yes                                           | 0.98 (0.64,1.50)  | 1.05 (0.69,1.61)   |
| 36 | No                                            | 1                 | 1                  |
| 37 | Birth in the last 1 year                      |                   |                    |
| 38 |                                               |                   |                    |
| 39 |                                               |                   |                    |
| 40 |                                               |                   |                    |
| 41 |                                               |                   |                    |
| 42 |                                               |                   |                    |
| 43 |                                               |                   |                    |
| 44 |                                               |                   |                    |
| 45 |                                               |                   |                    |
| 46 |                                               |                   |                    |
| 47 |                                               |                   |                    |
| 48 |                                               |                   |                    |
| 49 |                                               |                   |                    |
| 50 |                                               |                   |                    |
| 51 |                                               |                   |                    |
| 52 |                                               |                   |                    |
| 53 |                                               |                   |                    |
| 54 |                                               |                   |                    |
| 55 |                                               |                   |                    |
| 56 |                                               |                   |                    |
| 57 |                                               |                   |                    |
| 58 |                                               |                   |                    |
| 59 |                                               |                   |                    |
| 60 |                                               |                   |                    |

1  
2  
3  
4  
5  
6  
7  
8  
9  
10  
11  
12  
13  
14  
15  
16  
17  
18  
19  
20  
21  
22  
23  
24  
25  
26  
27  
28  
29  
30  
31  
32  
33  
34  
35  
36  
37  
38  
39  
40  
41  
42  
43  
44  
45  
46  
47  
48  
49  
50  
51  
52  
53  
54  
55  
56  
57  
58  
59  
60

|                                         |                       |                   |                   |
|-----------------------------------------|-----------------------|-------------------|-------------------|
|                                         | 0                     | 1                 | 1                 |
|                                         | 1-2                   | 1.20 (1.05,1.37)  | 1.15 (1.01,1.32)  |
| Children ever born in preceding 5 years |                       |                   |                   |
|                                         | 0                     | 1                 | 1                 |
|                                         | 1                     | 1.12 (0.96,1.29)  | 1.10 (0.95,1.27)  |
|                                         | 2+                    | 1.39 (1.16,1.66)  | 1.31 (1.09,1.57)  |
| HIV test                                |                       |                   |                   |
|                                         | Positive              | 2.19 (1.65, 2.91) | 2.11 (1.59, 2.79) |
|                                         | Negative              | 1                 | 1                 |
| <b>Community level factors</b>          |                       |                   |                   |
| Place of residence                      |                       |                   |                   |
|                                         | Urban                 | 1                 | 1                 |
|                                         | Rural                 | 1.67 (1.35,2.05)  | 1.29(1.02,1.63)   |
| Region                                  |                       |                   |                   |
|                                         | Tigray                | 0.39(0.28,0.53)   | 0.52(0.38, 0.72)  |
|                                         | Afar                  | 1.25 (0.91,1.7)   | 1.14 (0.83,1.56)  |
|                                         | Amhara                | 0.30 (0.22,0.41)  | 0.39 (0.28,0.54)  |
|                                         | Oromia                | 0.55 (0.41,0.75)  | 0.57 (0.42,0.78)  |
|                                         | Somali                | 2.40 (1.78,3.27)  | 2.16 (1.58,2.90)  |
|                                         | Benishangul-<br>Gumuz | 0.36 (0.25,0.50)  | 0.37 (0.26,0.52)  |
|                                         | SNNPR                 | 0.40 (0.29,0.54)  | 0.41(0.29,0.57)   |
|                                         | Gambella              | 0.63 (0.45,0.87)  | 0.63(0.45,0.89)   |
|                                         | Harari                | 0.74 (0.53,1.04)  | 0.76(0.54,1.04)   |
|                                         | Addis Ababa           | 0.54 (0.39,0.73)  | 0.67(0.49,0.91)   |
|                                         | Dire Dawa             | 1                 | 1                 |
| Water source                            |                       |                   |                   |
|                                         | Piped water           | 1                 | 1                 |
|                                         | Other improved        | 1.15 (0.95,1.39)  | 1.04 (0.86,1.26)  |
|                                         | Un-improved           | 1.18 (0.95,1.44)  | 1.03 (0.83,1.27)  |
| Latrine facility type                   |                       |                   |                   |
|                                         | Improved toilet       | 1                 | 1                 |
|                                         | Unimproved toilet     | 1.12 (0.97,1.29)  | 1.08 (0.94,1.25)  |

|                                                                                       |              |            |                  |                  |
|---------------------------------------------------------------------------------------|--------------|------------|------------------|------------------|
| Open defecation                                                                       |              |            | 1.33 (1.15,1.55) | 1.18 (1.00,1.39) |
| Other                                                                                 |              |            | 0.86 (0.64,1.17) | 0.94 (0.69,1.27) |
| <b>Random effects (effect of variation/ measure of variation for maternal anemia)</b> |              |            |                  |                  |
| Community level                                                                       | 0.888 (0.07) | 0.46(0.05) | 0.32(0.04)       | 0.31(0.035)      |
| variance (SE)                                                                         |              |            |                  |                  |
| P- value                                                                              | 0.001        | 0.001      | 0.001            | 0.001            |
| DIC(-2log likelihood)                                                                 | 7926.056     | 7749.25    | 7720.74          | 7613.56          |
| ICC (%)                                                                               | 21.25        | 16.1       | 18.3             | 15.86            |
| Explained variation –PCV (%)                                                          | Reference    | 40.95      | 21.0             | 43.1             |
| MOR                                                                                   | 2.44         | 2.13       | 2.3              | 2.1              |

Note: Model 1= empty model (without the predictors); Model 2= adjusted for individual factors; Model 3 = adjusted for community level factors; Model 4 = adjusted for both community and individual level factors; DIC = Deviance Information Criterion; ICC= Intra-cluster Correlation Coefficient; MOR= Median Odds Ratio; PCV = Percentage Change in Variance; SE= Standard Error; SNNPR=Southern Nations, Nationalities and Peoples' Region

## Spatial data analysis

Figure 3 displays the empirical Bayes smoothed proportion estimate of maternal anemia across regions in Ethiopia. A severe anemia prevalence rate ( $\geq 40\%$ ) among women of reproductive age was observed in Afar and Somali Regional States. Likewise, a moderate anemia prevalence rate (20-40%) occurred in Oromia, Gambella, SNNPR, Harari and Dire Dawa Regional States. Whereas, and a mild anemia prevalence rate ( $< 20\%$ ) was observed in Tigray and Amhara Regional States and Addis Ababa.

Similarly, the standardized prevalence ratio by regions (standardized to the national average prevalence of 23.6%), ranging from 0.63 to 2.39, was displayed on the map (Figure 3). A higher prevalence ratio of maternal anemia was observed in Somali (2.39), Afar (1.8) Oromia (1.17), Dire Dawa 1.15, Gambella (1.12) regional states (Figure 4); whereas, a lower prevalence ratio of anemia occurred in other regional states - Addis Ababa (0.64), Amhara (0.76), Benishangul-Gumuz (0.79), SNNPR (0.96), Tigray (0.85)

Figure 5 displays the smoothed anemia prevalence rates at zonal level where higher anemia rates were observed in all zones in Afar and Somali regions, as well as in some zones in Oromia. Likewise, the higher standardized ratio of maternal anemia was observed in all zones in Afar and Somali regions as well as in some zones in Oromia (Figure 6).

The spatial distributions of maternal anemia at the lower level (cluster level) is displayed in figure 6. The spatial investigation at the cluster level indicated that statistically high hotspots of anemia were observed in the eastern (Somali, Dire Dawa and Harari regions) and in north-eastern (Afar) parts of the country, while cold spots of anemia were observed in the northern (Tigray, Amhara), central (Addis Ababa, Oromia) and western (Benishangul-Gumuz and Gambella) parts of the country (Figure 7).

## Discussion

Approximately a quarter of women of reproductive age were anemic in the current study, indicating that anemia is a moderate public health problem at the national level in Ethiopia [1]. However, geographic differences demonstrated that anemia is a particularly serious public health problem in 5 of the 11 Ethiopian states. A higher proportion of anemia cases was observed in the eastern and north-eastern parts of the country, which are less developed compared to other Ethiopian states in terms of economy, gender, health care facility and food availability [38]. The geographical difference of anaemia across the regional states might be attributable to the regional variation of food consumption preferences [39, 40], the occurrence

1  
2  
3 of communicable diseases [41], and differences in availability of health care facilities [42]. The  
4 altitude also has an effect on the hemoglobin level [1] which results in a disparity of anemia  
5 occurrence across the country. In addition, lack of clean water and unimproved latrine facilities  
6 would increase the occurrence of soil transmitted infection [43] which in turn could lead to  
7 anemia [44]; these might explain some of the observed geographical differences.  
8  
9

10  
11  
12 According to the final model, both individual and community level factors were responsible  
13 for about 43% of the disparity of anemia prevalence rates among women of reproductive age  
14 in Ethiopia. After adjusting for all factors in the model, the likelihood of having anemia was  
15 higher among those of younger age, with lower levels of education, living in rural areas, in the  
16 lowest wealth quantile, who were currently pregnant or breastfeeding, with high gravidity, who  
17 had given birth in the year prior to the survey and who were without access to an improved  
18 latrine facility.  
19  
20  
21  
22  
23  
24

25 Women aged 40-49 years had a lower likelihood of being anemic compared to women aged  
26 between 15-19 years. This finding is in line with other study findings from Ethiopia [16, 19]  
27 and Benin [45]. This could be due to the fact that low fertility rates occurred in this age group  
28 (40-49) [11]. However, in Iran [46] it has been reported that women aged 20-24 were less likely  
29 to be anemic compared to those aged 45-49; this might be a result of Iran having a targeted  
30 intervention for younger women or women of reproductive age [46].  
31  
32  
33  
34  
35

36 In this study, it was found that there is variation of the anemia rate in terms of education status  
37 of the women. A higher proportion of anemic cases were observed among women with no  
38 education. It was found that women who did not have formal education had higher odds of  
39 anemia than those with higher education. This is consistent with other studies conducted in  
40 developing countries [24] including in Ethiopia [16], Timor-Leste [47], Benin [45] and India  
41 [48, 49] in which it was reported that a low level of education was associated with higher odds  
42 of anemia among women of reproductive age. Formal education might assist women to obtain  
43 knowledge that in turn helps them to follow better lifestyle behaviours like good nutrition, and  
44 to form better health-seeking habits and hygiene practices that can prevent maternal anemia.  
45  
46  
47  
48  
49  
50  
51

52 A higher proportion of anemic cases were observed among women in the poorest wealth  
53 quantile. The lowest wealth quantile compared to highest quantile was associated with a higher  
54 risk of maternal anemia. Results of this study show that women who were in the poorest wealth  
55 quintile were 30% more likely to be anemic than women who belong to the richest quintile;  
56 this is in line with the results of other studies conducted in other developing countries [24] like  
57  
58  
59  
60



1  
2  
3 Benin [45] and India [49, 50]. This might be due to the fact that having a low income would  
4 mean having less money to buy nutritious foods or have a balanced diet [51, 52], which in turn  
5 leads to inadequate nutrient intake and nutritional status [53]. More than 38 % of the Ethiopian  
6 population belongs to the poor and poorest wealth quintile, which indicates a large percentage  
7 of women are at risk for anemia because of low socioeconomic position [11].  
8  
9

10  
11  
12 Lactating mothers were 9% more likely to have anemia than non- lactating mothers. Lactating  
13 may predispose women to low haemoglobin, which results in anemia. In a study conducted in  
14 India [54], a similar finding was reported, that lactating mothers were more likely to be anemic  
15 than non-lactating women.  
16  
17  
18

19  
20 The findings of our study clearly show the role of women's fertility in anemia. Increased odds  
21 of anemia was associated with high gravidity, births in the past five years of the survey and  
22 having a birth in the last year. Similar studies in Ethiopia [16], Iran [46] and Timor-Leste [47]  
23 also document this association between parity and risk of anemia. The study results from  
24 Pakistan [55, 56] and Iran [46] indicate that women with a parity of four or more were found  
25 to be at increased risk of anaemia than women with lower parity. This might be explained by  
26 that fact that the more the women give birth, the more they are exposed to blood loss which in  
27 turn results in low hemoglobin levels in the blood [57]. Similarly, prior births may deplete  
28 maternal iron stores due to the increased nutritional demands of pregnancy and puerperal blood  
29 loss [58]. Consequently, emphasis needs to be placed on family planning services. Increased  
30 odds of anemia were observed in women who were HIV positive. In this study, women who  
31 were HIV positive had twofold increased odds for anemia. This could be due to the direct  
32 effects of the HIV infection on the bone marrow and depletion of hemoglobin levels in the  
33 blood [59]. Many of the opportunistic infections to which HIV patients are susceptible might  
34 also lead to anemia [59].  
35  
36  
37  
38  
39  
40  
41  
42  
43  
44  
45

46  
47 This study revealed there to be a significant difference in the proportion of anemic cases  
48 according to place of residence (urban/rural). The likelihood of having anemia was higher for  
49 rural residents compared to urban residents. This is in agreement with a study conducted in low  
50 income countries in which it was revealed that living in a rural area was a determinant factor  
51 for anemia [24]. A recent report illustrated that more than half of the Ethiopian population had  
52 access to unimproved toilet facilities [60]. Our study findings revealed that women from  
53 households with unimproved latrine facilities were more likely to be anemic than women from  
54 households with improved latrine facilities, which is in agreement with other research findings  
55  
56  
57  
58  
59  
60

1  
2  
3 [45, 61]. The possible justification might be that an unimproved latrine facility would expose  
4 women to helminthic infections [43], which in turn resulted them developing anemia [44].  
5  
6

### 7 **Strength and Limitations**

9 This study used large population-based data with a large sample size, which is representative  
10 of all regions of Ethiopia. Furthermore, a combination of statistical methods (spatial analysis  
11 and multilevel logistics analysis) were applied for this study which allows for the understanding  
12 of the role of contextual and geographical factors in the occurrence of anemia among women  
13 of reproductive age. Because of the cross sectional nature of the EDHS data, the cause/effect  
14 and temporal relationship could not be established based on these study findings. Similarly,  
15 essential factors such as dietary intake and behavioural factors were not available in the EDHS  
16 survey so that it was not possible to incorporate these variables in the analysis. Furthermore,  
17 EDHS was a questionnaire based survey and relied on the memory of the respondents, and as  
18 such, recall bias in the results might be a weakness for this study.  
19  
20  
21  
22  
23  
24  
25

### 26 **Conclusion**

27 This study indicates that considerable geographic disparities in maternal anemia prevalence  
28 rate occur within Ethiopia. The results of this study revealed that maternal anemia was non-  
29 random across the country; significant anemia hotspots were observed in the eastern and north  
30 eastern part of the country while anemia cold spots were observed in the northern and western  
31 parts of the country. About 43% of the disparity in maternal anemia occurrence across  
32 communities was attributable to both individual and community level factors. The increased  
33 occurrence of maternal anemia was associated with individual and community level factors.  
34 For women, being of rural residence, having no formal education, being in the poorest wealth  
35 index, either currently pregnant or breastfeeding, and higher gravidity were factors that  
36 increased the odds of maternal anemia at the individual level, whereas lack of a clean water  
37 source, and access to an unimproved toilet facility were factors significantly associated with  
38 maternal anemia.  
39  
40  
41  
42  
43  
44  
45  
46  
47  
48

49 Accordingly, the prevention of maternal anemia requires multifaceted intervention approaches,  
50 for instance, improving the economic and educational status of women, and improving the  
51 availability of clean water and toilet facilities. Anemia prevention strategies must be targeted  
52 on the identified factors. Priority should be given for those states or areas which have maternal  
53 anemia hotspots. Particularly, any intervention programs need to be prioritized for pregnant  
54 women, women having a recent birth, those with lower levels of education, and women living  
55 in rural areas. The regions with the greatest numbers of anemic women (Afar and Somali)  
56  
57  
58  
59  
60

1  
2  
3 should be prioritized, as the burden of anemia is higher in these areas, with more than 50% of  
4 women being anemic.  
5  
6

### 7 **Acknowledgments**

8  
9 We would like to thank the DHS program for allowing the use of EDHS data for this study.  
10 We are also very grateful to acknowledge Dr Ryan O'Neill for his help in language editing.  
11

### 12 **Authors' contributions**

13  
14 Formulating the research question(s): KTK CC DL EG; designing the study: KTK CC DL  
15 EG; analysing the data: KTK Interpreting the results: KTK CC DL EG; drafting, writing,  
16 reviewing and approving the final manuscript: KTK CC DL EG.  
17  
18

### 19 **Financial support**

20  
21 This research received no specific grant from any funding agency, or the commercial or not-  
22 for-profit sectors.  
23

### 24 **Conflicts of interest**

25  
26 The authors declare that they have no conflicting interests.  
27

### 28 **Data sharing statement**

29  
30 This study was an in depth analysis of publicly available dataset from the Demographic and  
31 Health Surveys Program (DHS Program). The dataset is available at the DHS program website  
32 (<http://www.measuredhs.com>)  
33  
34  
35  
36  
37  
38  
39  
40  
41  
42  
43  
44  
45  
46  
47  
48  
49  
50  
51  
52  
53  
54  
55  
56  
57  
58  
59  
60

1  
2  
3 Figure 1: Selection of the Sample in the 2016 EDH Survey  
4

5 Figure 2: Average hemoglobin value with 95% CI at different age groups, Ethiopia, 2016  
6

7 Figure 3. Spatial Empirical Bayesian smoothed (SEBS) percentage of maternal anemia across  
8 regions  
9

10  
11 Figure 4. Standardized prevalence ratio for anemia among women of reproductive age across  
12 the regions in Ethiopia (standardized to national prevalence of 23.6%).  
13  
14

15 Figure 5. Spatial Empirical Bayesian smoothed (SEBS) percentage of maternal anemia across  
16 Zones  
17

18 Figure 6. Standardized prevalence ratio for anemia among women of reproductive age across  
19 Zones in Ethiopia (standardized to national prevalence of 23.6%).  
20  
21

22 Figure 7. Spatial pattern of hotspots and cold spots of maternal anemia rate at cluster level in  
23 Ethiopia, EDHS, 2016  
24  
25  
26  
27

## 28 References

- 29 1. WHO Haemoglobin concentrations for the diagnosis of anaemia and assessment of severity. Vitamin and Mineral Nutrition Information System. Geneva, World Health Organization, 2011 (WHO/NMH/NHD/MNM/11.1) (<http://www.who.int/vmnis/indicators/haemoglobin.pdf>, accessed on Jan 9, 2017). 2011.
- 30 2. Lumbiganon P, Laopaiboon M, Intarut N, et al. Indirect causes of severe adverse maternal outcomes: a secondary analysis of the WHO Multicountry Survey on Maternal and Newborn Health. *BJOG* 2014; 121 Suppl 1:32-9.
- 31 3. Albacar G, Sans T, Martin-Santos R, et al. An association between plasma ferritin concentrations measured 48 h after delivery and postpartum depression. *J Affect Disord* 2011; 131(1-3):136-42.
- 32 4. Corwin EJ, Murray-Kolb LE, Beard JL. Low Hemoglobin Level Is a Risk Factor for Postpartum Depression. *J Nutr* 2003; 133:4139-42.
- 33 5. Aghamohammadi A, Zafari M, Tofighi M. High maternal hemoglobin concentration in first trimester as risk factor for pregnancy induced hypertension. *Caspian J Intern Med* 2011; 2(1):194-7.
- 34 6. Zafar T, IQBAL Z. IRON STATUS IN PREECLAMPSIA. *Professional Med J Mar* 2008; 15(1):74-80.
- 35 7. Rahman MM, Abe SK, Rahman MS, et al. Maternal anemia and risk of adverse birth and health outcomes in low- and middle-income countries: systematic review and meta-analysis. *American Journal of Clinical Nutrition* 2016; 103(2):495-504.
- 36 8. Stevens GA, Finucane MM, De-Regil LM, et al. Global, regional, and national trends in haemoglobin concentration and prevalence of total and severe anaemia in children and pregnant and non-pregnant women for 1995–2011: a systematic analysis of population-representative data. *The Lancet Global Health* 2013; 1(1):e16-e25.
- 37 9. Kassebaum NJ, Jasrasaria R, Naghavi M, et al. A systematic analysis of global anemia burden from 1990 to 2010. *Blood* 2014; 123(5):615-24.
- 38 10. WHO Global nutrition targets 2025: anaemia policy brief (WHO/NMH/NHD/14.4). Geneva: World Health Organization; 2014.

- [http://apps.who.int/iris/bitstream/10665/148556/1/WHO\\_NMH\\_NHD\\_14.4\\_eng.pdf?](http://apps.who.int/iris/bitstream/10665/148556/1/WHO_NMH_NHD_14.4_eng.pdf?), Accessed on August 27,2017). 2014.
11. Central Statistical Agency (CSA) [Ethiopia] and ICF Ethiopia Demographic and Health Survey 2016. Addis Ababa, Ethiopia, and Rockville, Maryland, USA: CSA and ICF. 2016.
  12. Melku M, Addis Z, Alem M, et al. Prevalence and Predictors of Maternal Anemia during Pregnancy in Gondar, Northwest Ethiopia: An Institutional Based Cross-Sectional Study. *Anemia* 2014; 2014:108593.
  13. Gebremedhin S, Enquselassie F, Umata M. Prevalence and Correlates of Maternal Anemia in Rural Sidama, Southern Ethiopia. *African Journal of Reproductive Health / La Revue Africaine de la Santé*; Reproductive 2014; 18(1):44-53.
  14. Kedir H, Berhane Y, Worku A. Khat chewing and restrictive dietary behaviors are associated with anemia among pregnant women in high prevalence rural communities in eastern Ethiopia. *PLoS One* 2013; 8(11):e78601.
  15. Addis Alene K, Mohamed Dohe A. Prevalence of Anemia and Associated Factors among Pregnant Women in an Urban Area of Eastern Ethiopia. *Anemia* 2014; 2014:561567.
  16. Asres Y, Yemane T, Gedefaw L. Determinant Factors of Anemia among Nonpregnant Women of Childbearing Age in Southwest Ethiopia: A Community Based Study. *Int Sch Res Notices* 2014; 2014:391580.
  17. Haidar JA, Pobocik RS. Iron deficiency anemia is not a rare problem among women of reproductive ages in Ethiopia: a community based cross sectional study. *BMC Blood Disord* 2009; 9:7.
  18. Haidar J. Prevalence of Anaemia, Deficiencies of Iron and Folic Acid and Their Determinants in Ethiopian Women. *Journal of Health, Population, and Nutrition* 2010; 28(4):359-68.
  19. Umata M, Haidar J, Demissie T, et al. Iron Deficiency Anaemia among Women of Reproductive Age in Nine Administrative Regions of Ethiopia. *EthiopJHealth Dev* 2008; 22(3):252-8.
  20. Pokropek C, Sobolewski P, Getachew R, et al. Dietary intake patterns and insulin resistance in women with a history of gestational diabetes in the National Health and Nutrition Examination Survey (NHANES) 2000-2010. *American Journal of Obstetrics and Gynecology* 2015; 1):S308.
  21. WHO. Assessing iron status of populations: report of a joint WHO/ CDC technical consultation on the assessment of iron status at the population level, 2nd ed., Geneva, WHO. Available at [http://www.who.int/nutrition/publications/micronutrients/anaemia\\_iron\\_deficiency/9789241596107.pdf](http://www.who.int/nutrition/publications/micronutrients/anaemia_iron_deficiency/9789241596107.pdf). 2007.
  22. Dreyfus ML, Stoltzfus RJ, Shrestha JB, et al. Hookworms, Malaria and Vitamin A Deficiency Contribute to Anemia and Iron Deficiency among Pregnant Women in the Plains of Nepal. *J Nutr* 2000; 130:2527–36.
  23. Brooker S, Hotez PJ, Bundy DA. Hookworm-related anaemia among pregnant women: a systematic review. *PLoS Negl Trop Dis* 2008; 2(9):e291.
  24. Balarajan Y, Ramakrishnan U, Özaltin E, et al. Anaemia in low-income and middle-income countries. *The Lancet* 2011; 378(9809):2123-35.
  25. Petry N, Olofin I, Hurrell RF, et al. The Proportion of Anemia Associated with Iron Deficiency in Low, Medium, and High Human Development Index Countries: A Systematic Analysis of National Surveys. *Nutrients* 2016; 8(11).
  26. Gebre A, Mulugeta A. Prevalence of Anemia and Associated Factors among Pregnant Women in North Western Zone of Tigray, Northern Ethiopia: A Cross-Sectional Study. *J Nutr Metab* 2015; 2015:165430.
  27. Kefiyalew F, Zemene E, Asres Y, et al. Anemia among pregnant women in Southeast Ethiopia: prevalence, severity and associated risk factors. *BMC Research Notes* 2014; 7(771).

- 1
  - 2
  - 3
  - 4
  - 5
  - 6
  - 7
  - 8
  - 9
  - 10
  - 11
  - 12
  - 13
  - 14
  - 15
  - 16
  - 17
  - 18
  - 19
  - 20
  - 21
  - 22
  - 23
  - 24
  - 25
  - 26
  - 27
  - 28
  - 29
  - 30
  - 31
  - 32
  - 33
  - 34
  - 35
  - 36
  - 37
  - 38
  - 39
  - 40
  - 41
  - 42
  - 43
  - 44
  - 45
  - 46
  - 47
  - 48
  - 49
  - 50
  - 51
  - 52
  - 53
  - 54
  - 55
  - 56
  - 57
  - 58
  - 59
  - 60
28. Rezende LF, Eluf-Neto J Population attributable fraction: planning of diseases prevention actions in Brazil. *Rev Saude Publica* 2016; 50.
29. Bates I, McKew S, Sarkinfada F Anaemia: A useful indicator of neglected disease burden and control. *PLoS Med* 2007; 4(8):e231. doi:10.1371/journal.pmed.0040231.
30. Lawson AB. *Statistical Methods in Spatial Epidemiology*. Atrium, Southern Gate, West Sussex, England: John Wiley & Sons Inc; 2006.
31. Anselin L *Exploring Spatial Data with GeoDaTM : A Workbook*. Center for Spatially Integrated Social Science <http://www.csis.org/> 2005.
32. Banerjee S *Spatial Data Analysis*. *Annu Rev Public Health* 2016; 37:47-60.
33. Ord J, Getis A *Local Spatial Autocorrelation Statistics: Distributional Issues and an Application*. *Geographical Analysis* 1995; 27(4):286–306.
34. Merlo J, Chaix B, Ohlsson H, et al. A brief conceptual tutorial of multilevel analysis in social epidemiology: using measures of clustering in multilevel logistic regression to investigate contextual phenomena. *J Epidemiol Community Health* 2006; 60(4):290-7.
35. Merlo J, Yang M, Chaix B, et al. A brief conceptual tutorial on multilevel analysis in social epidemiology: investigating contextual phenomena in different groups of people. *J Epidemiol Community Health* 2005; 59(9):729-36.
36. Larsen K, Merlo J *Appropriate assessment of neighborhood effects on individual health: integrating random and fixed effects in multilevel logistic regression*. *Am J Epidemiol* 2005; 161(1):81-8.
37. Guo G, Zhao H *Multilevel Modeling for Binary Data*. *Annual Review Sociology*. *Annual Review Sociology* 2000; 26:441–62.
38. International food policy research Institute (IFPRI) and Central Statistical agency (CSA) *Population & Housing Census Atlas of Ethiopia 2007*, Addis Ababa, Ethiopia. 2010.
39. Ethiopian Public Health Institute *Food Consumption Survey*. Ethiopian Food Consumption Survey Report, Addis Ababa, Ethiopia 2013.
40. Berhane G, Paulos Z, Tafere K, et al. *Foodgrain Consumption and Calorie Intake Patterns in Ethiopia*, Ethiopia Strategy Support Program II (ESSP II). Working Paper No 23 2011.
41. Ministry of Health of Ethiopia *Health and Health Related Indicator, Version 1*, Addis Ababa, Ethiopia. 2008.
42. Chaya N *Poor Access to Health Services: Ways Ethiopia is Overcoming* Research Commentary 2007; 2(2).
43. Mara D, Lane J, Scott B, et al. *Sanitation and Health*. *PLoS Med* 7(11): e1000363 doi:10.1371/journal.pmed.1000363 2010.
44. Tay SCK, Nani EA, Walana W *Parasitic infections and maternal anaemia among expectant mothers in the Dangme East District of Ghana*.
45. Alaofè H, Burney J, Naylor R, et al. *Prevalence of anaemia, deficiencies of iron and vitamin A and their determinants in rural women and young children: a cross-sectional study in Kalalé district of northern Benin*. *Public Health Nutrition*: 20(7), 1203–1213 doi:10.1017/S1368980016003608 2017.
46. Sadeghian M, Fatourehchi A, Lesanpezeski M, et al. *Prevalence of Anemia and Correlated Factors in the Reproductive Age Women in Rural Areas of Tabas*. *J Fam Repr Health* 2013; 7(3).
47. Lover AA, Hartman M, Chia KS, et al. *Demographic and Spatial Predictors of Anemia in Women of Reproductive Age in Timor-Leste: Implications for Health Program Prioritization*. *PLoS ONE* 9(3): e91252 doi:10.1371/journal.pone.0091252.
48. K CG, K SK *A cross-sectional study of anemia among women of reproductive age group (15-49 years) in a rural population of Tamil Nadu*. *Int J Med Sci and PH* 2017; 6(3).
49. Balarajan YS, Fawzi WW, Subramanian SV *Changing patterns of social inequalities in anaemia among women in India: cross-sectional study using nationally representative data*. *BMJ Open* 2013; 3:e002233. doi:10.1136/bmjopen-2012002233.

- 1  
2  
3  
4  
5  
6  
7  
8  
9  
10  
11  
12  
13  
14  
15  
16  
17  
18  
19  
20  
21  
22  
23  
24  
25  
26  
27  
28  
29  
30  
31  
32  
33  
34  
35  
36  
37  
38  
39  
40  
41  
42  
43  
44  
45  
46  
47  
48  
49  
50  
51  
52  
53  
54  
55  
56  
57  
58  
59  
60
50. Rammohan A, Awofeso N, Robitaille M-C Addressing Female Iron-Deficiency Anaemia in India: Is Vegetarianism the Major Obstacle? *ISRN Public Health* 2012; 2012:1-8.
  51. Lenz A, Olinto MTA, Dias-da-Costa JS, et al. Socioeconomic, demographic and lifestyle factors associated with dietary patterns of women living in Southern Brazil. *Cad Saúde Pública, Rio de Janeiro* 2009; 25(6):1297-306.
  52. USAID/ENGINE Maternal Diet and Nutrition Practices and Their Determinants: A report on formative research findings 2014.
  53. Desalegn K, Pragya S, Debebe M, et al. Nutritional Status and Associated Factors among Pregnant Women in Wondo Genet District, Southern Ethiopia. *Journal of Food Science and Engineering* 2015; 5(2).
  54. Siddiqui MZ, Goli S, Reja T, et al. Prevalence of Anemia and Its Determinants Among Pregnant, Lactating, and Nonpregnant Nonlactating Women in India. *SAGE Open* 2017:1 –10 DOI: .1177/2158244017725555.
  55. Soofi S, Khan GN, Sadiq K, et al. Prevalence and possible factors associated with anaemia, and vitamin B12 and folate deficiencies in women of reproductive age in Pakistan: analysis of national-level secondary survey data. *BMJ Open* 2017;7:e018007 doi:10.1136/bmjopen-2017-018007.
  56. Habib MA, Soofi SB, Ahmed I, et al. Prevalence and determinants of iron deficiency anemia among non-pregnant women of reproductive age in Pakistan. *Asia Pac J Clin Nutr* 2018;27(1):195-203.
  57. BH R, Patil PS, Joseph J Multigravidity a Major Risk Factor of Anaemia in Pregnancy and its Comparison in Primigravida Women in Raichur. *National J Lab Med* 2017; 6(4):PO22-PO7.
  58. Al-Farsi YM, Brooks DR, Werler MM, et al. Effect of high parity on occurrence of anemia in pregnancy: a cohort study. *BMC Pregnancy and Childbirth* 2011; 11(7):<http://www.biomedcentral.com/1471-2393/11/7>.
  59. Kokici M, Harxhi A, Como N, et al. Haematological changes in HIV infection. *Int J Ecosyst and Ecol Sci* 2016; 6 (1):19-24
  60. Beyene A, Hailu T, Faris K, et al. Current state and trends of access to sanitation in Ethiopia and the need to revise indicators to monitor progress in the Post-2015 era. *BMC Public Health* (2015) 15:451 DOI 10.1186/s12889-015-1804-4.
  61. Freeman MC, Garn JV, Sclar GD, et al. The impact of sanitation on infectious diseases and nutritional status: Systematic Review and meta analysis. *Int J Hygn & Env Health* 2017; 220:928-49.

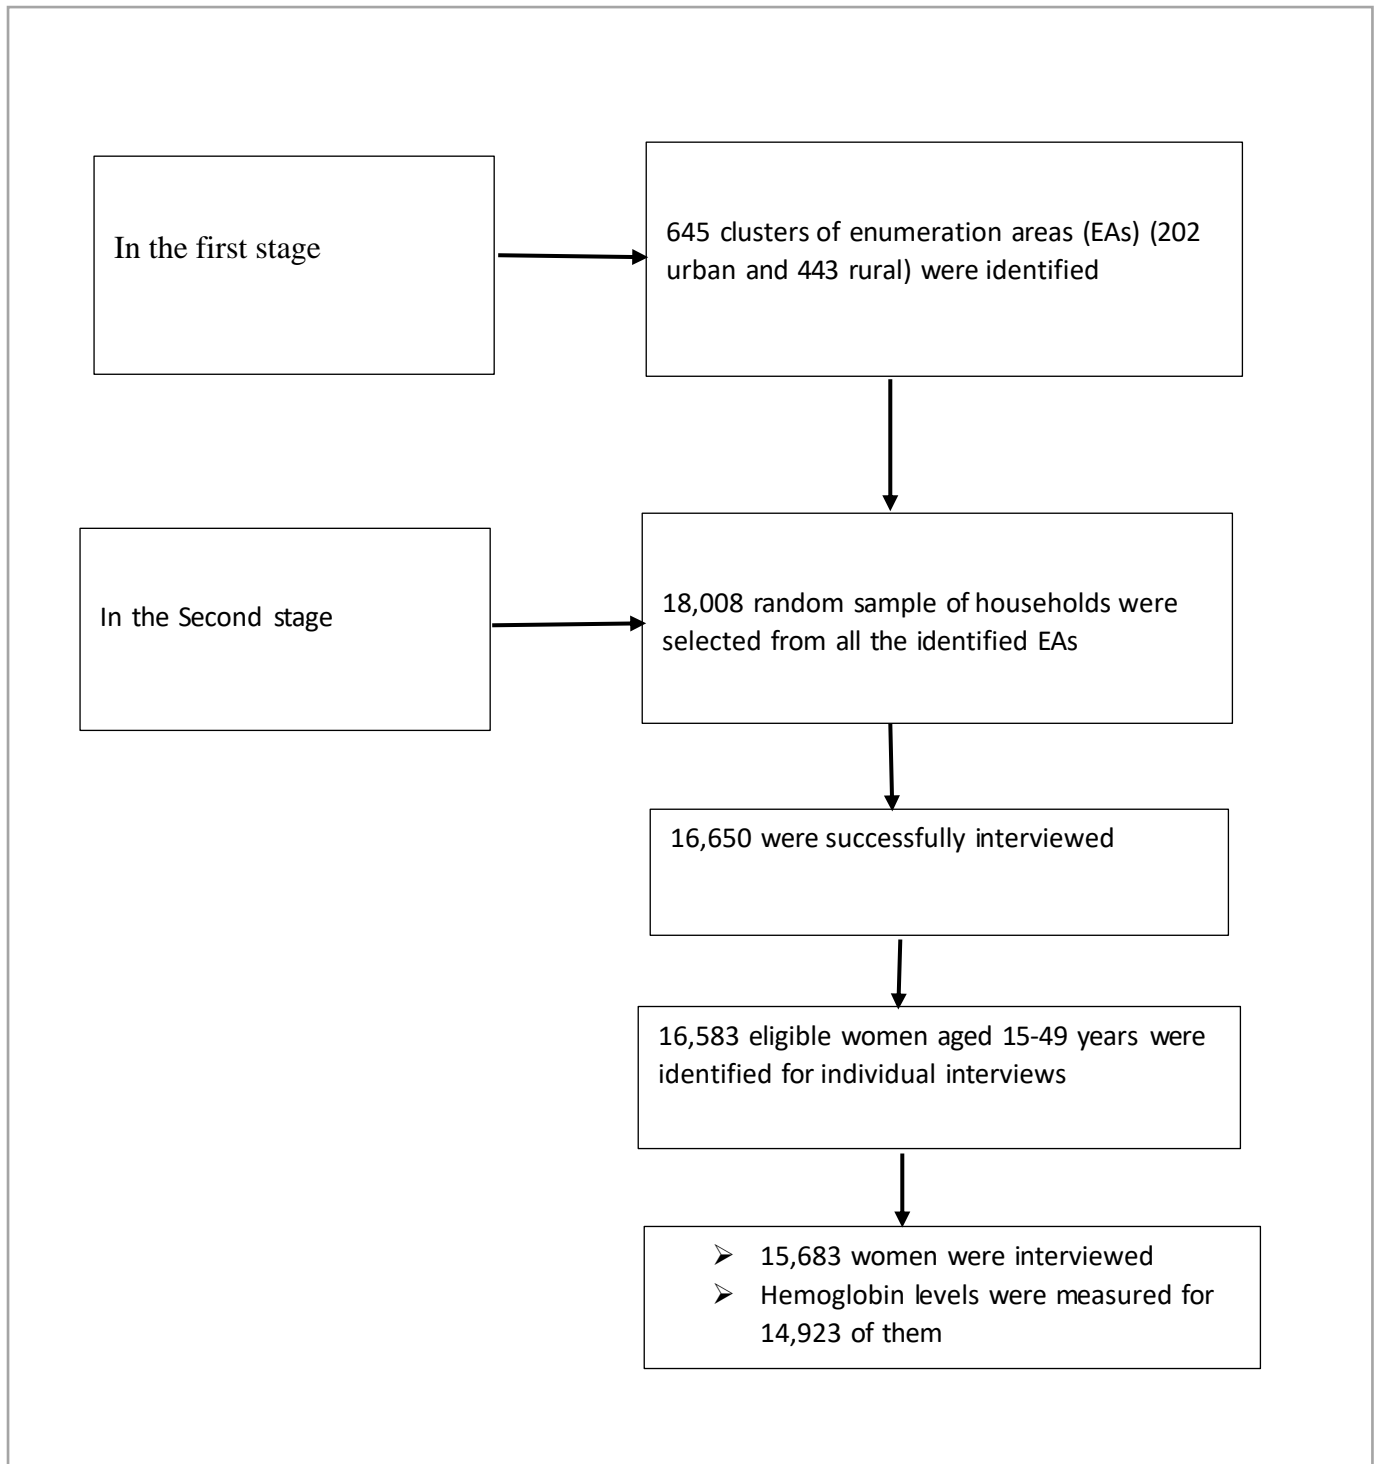

51 Figure 1: Selection of sample in the 2016 EDH Survey  
52  
53  
54  
55  
56  
57  
58  
59  
60



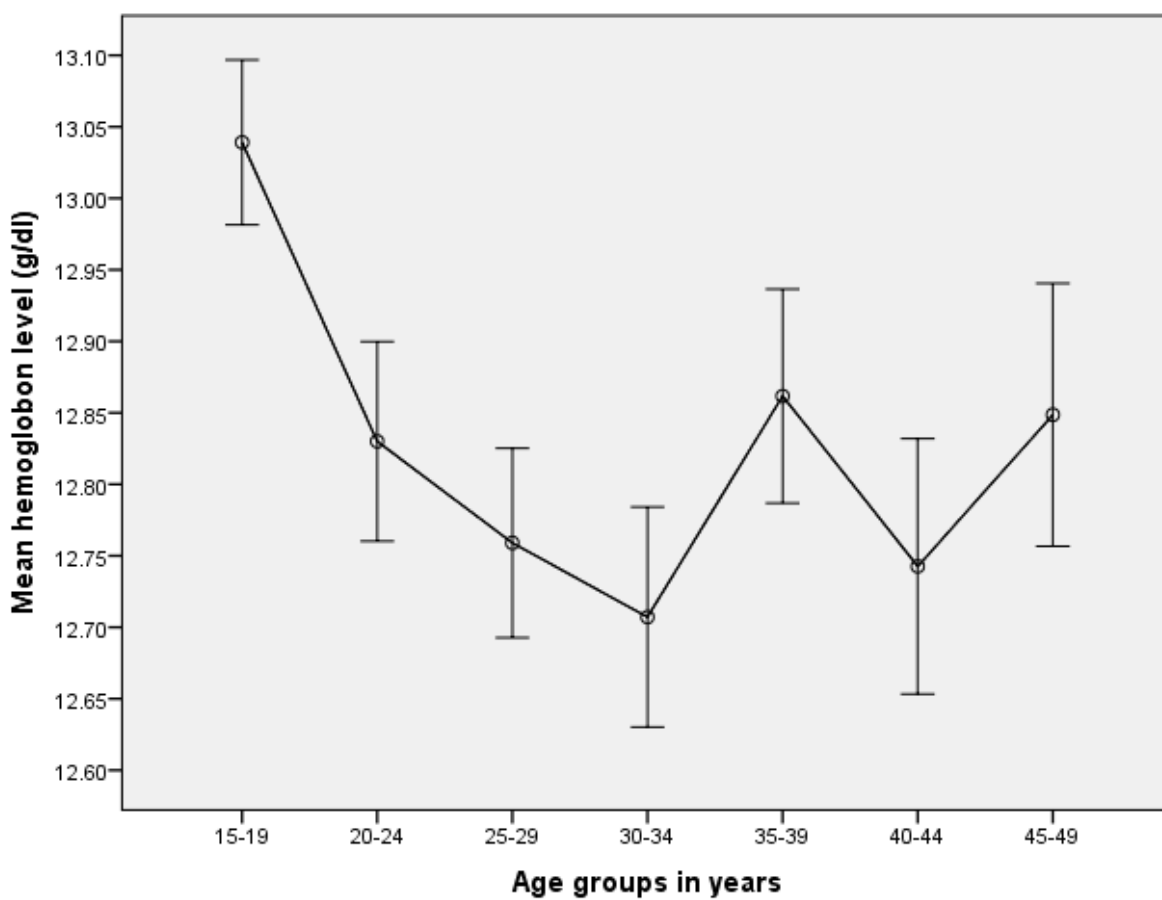

Figure 2: Average hemoglobin value with 95% CI at different age groups, Ethiopia, 2016

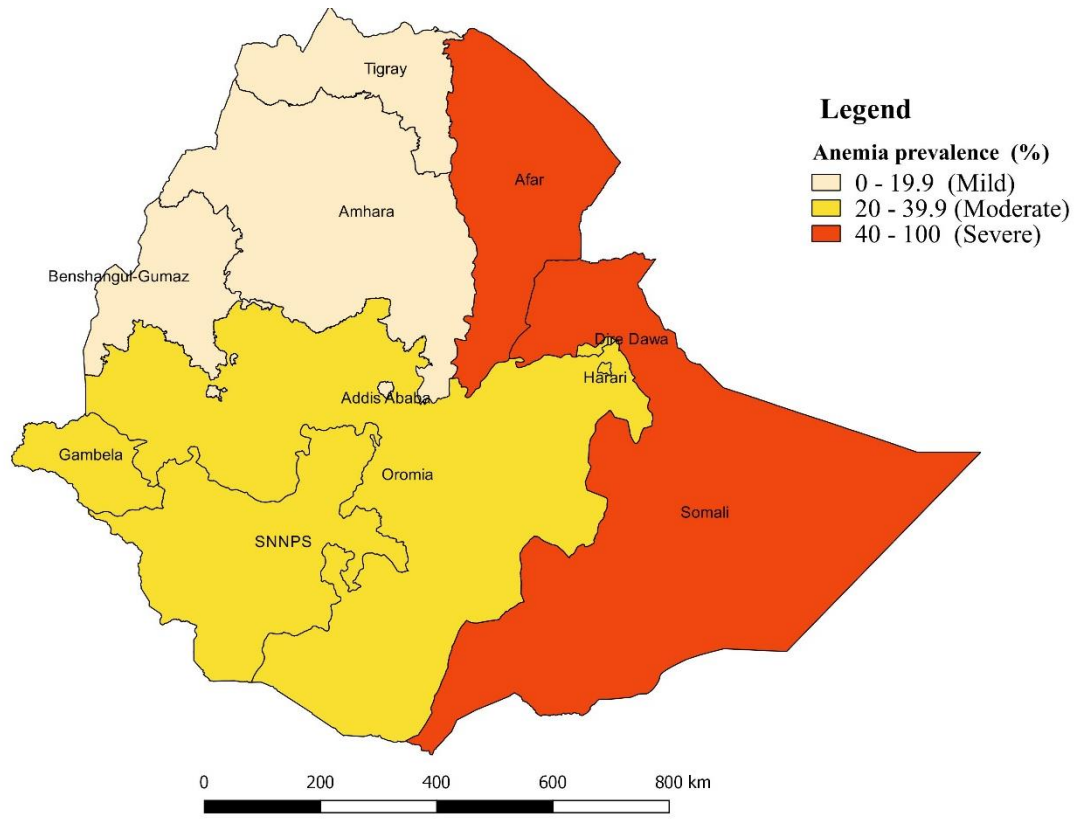

Figure 3. Spatial Empirical Bayesian smoothed (SEBS) percentage of maternal anemia across regions

1  
2  
3  
4  
5  
6  
7  
8  
9  
10  
11  
12  
13  
14  
15  
16  
17  
18  
19  
20  
21  
22  
23  
24  
25  
26  
27  
28  
29  
30  
31  
32  
33  
34  
35  
36  
37  
38  
39  
40  
41  
42  
43  
44  
45  
46  
47  
48  
49  
50  
51  
52  
53  
54  
55  
56  
57  
58  
59  
60

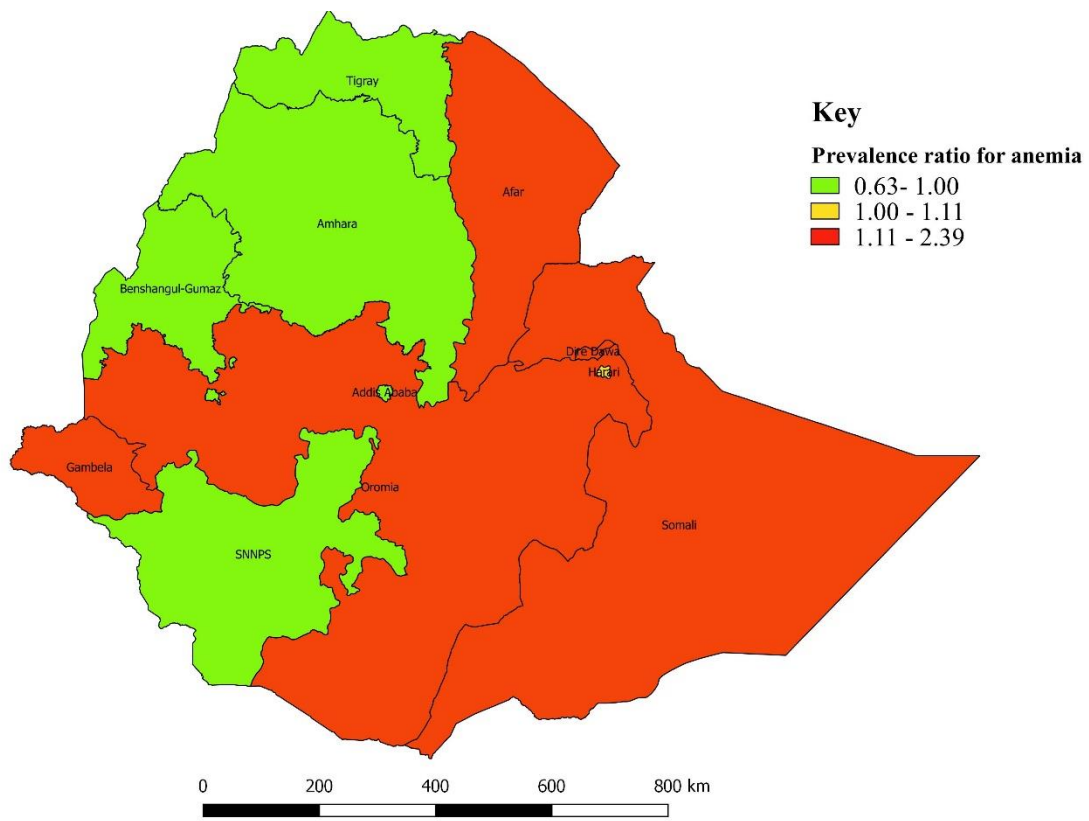

Figure 4. Standardized prevalence ratio for anemia among women of reproductive age across the regions in Ethiopia (standardized to national prevalence of 23.6%).



Figure 5. Spatial Empirical Bayesian smoothed (SEBS) percentage of maternal anemia across Zones

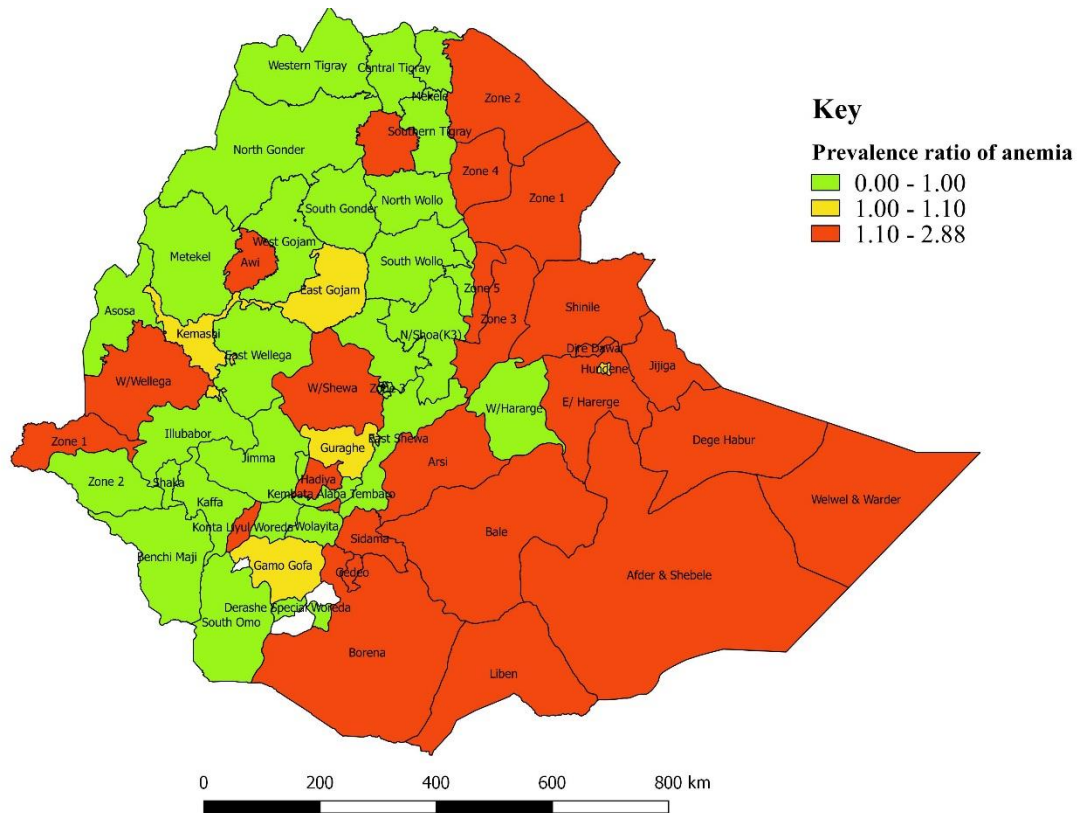

Figure 6. Standardized prevalence ratio for anemia among women of reproductive age across Zones in Ethiopia (standardized to national prevalence of 23.6%).

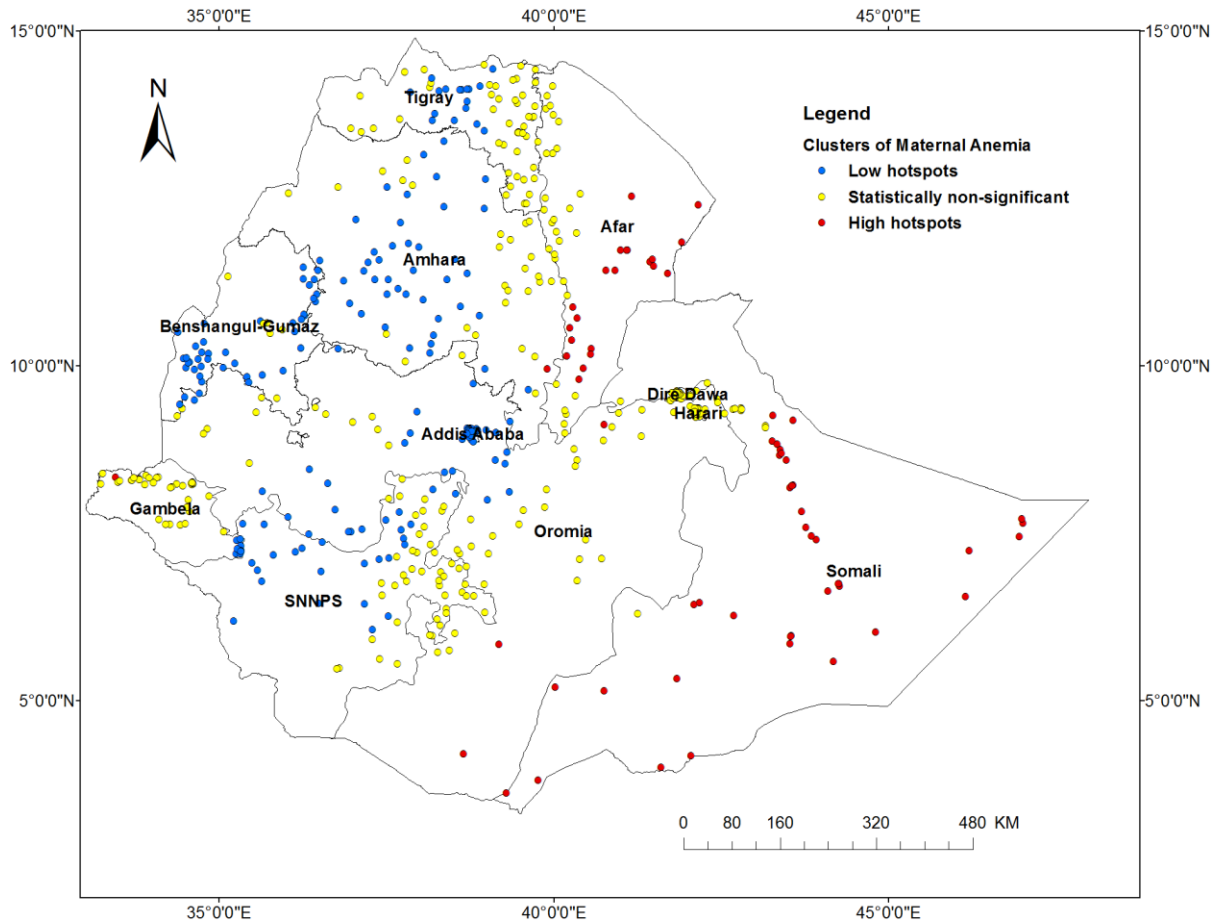

Figure 7. Spatial pattern of hot spots and cold spots of maternal anemia rate at cluster level in Ethiopia, EDHS, 2016.

Table 1 Variables identified for this study with coding

| Variable                                                                                                                  | Categories                                                                                                                                                                                                                            |
|---------------------------------------------------------------------------------------------------------------------------|---------------------------------------------------------------------------------------------------------------------------------------------------------------------------------------------------------------------------------------|
| Age (Age in 5-year groups)                                                                                                | 1=15-19; 2=20-29; 3=30-39; 4=40-49                                                                                                                                                                                                    |
| Region                                                                                                                    | 1=Tigray; 2=Afar; 3=Amhara; 4= Oromia; 5=Somali;<br>6=Benishangul-Gumuz; 7=SNNNP; 8=Gambella; 9=Harari;<br>10=Addis Ababa; 11=Dire Dawa                                                                                               |
| Area of residence                                                                                                         | 1=Urban; 2=Rural                                                                                                                                                                                                                      |
| Education level                                                                                                           | 1=No Education; 2= Primary; 3=Secondary; 4=Higher                                                                                                                                                                                     |
| Source of drinking water                                                                                                  | 1=piped water; 2=other improved (public taps, standpipes, tube wells, boreholes, protected dug wells and springs, and rainwater, bottled water); 3=unimproved (river, pond, unprotected spring and well)                              |
| Type of toilet facility                                                                                                   | 1= Improved (flush/pour flush toilets to piped sewer systems, septic tanks, and pit latrines; ventilated improved pit (VIP) latrines; pit latrines with slabs; and composting toilets);<br>2=Unimproved; 3=Open defecation; 4= Others |
| Religion                                                                                                                  | 1=Orthodox; 2=Protestant; 3=Muslim; 4= Others (Catholic, traditional, other)                                                                                                                                                          |
| Ethnicity                                                                                                                 | 1=Amhara; 2= Oromo; 3= Tigray; 4= Somali; 5= Sidama;<br>6=Gurage; 7=Welayta; 8=Hadya; 9=Other                                                                                                                                         |
| Wealth index                                                                                                              | 1=Poorest; 2=Poorer; 3=Middle; 4=Richer; 5=Richest                                                                                                                                                                                    |
| Preceding birth interval (months) (for index child- for youngest child) except the first birth, no interval for 1st birth | 1= <24 Months; 2= ≥24 Months                                                                                                                                                                                                          |
| Total children ever born                                                                                                  | 1=0; 2= 1-3; 3= 4+                                                                                                                                                                                                                    |
| Births in past year (number of births in the 12 months (not 0 to 11) prior to the month of interview)                     | 1= 0; 2= 1-2                                                                                                                                                                                                                          |
| Currently pregnant                                                                                                        | 0=No or unsure; 1=Yes                                                                                                                                                                                                                 |

| Variable                                                                                                                     | Categories                                                                                                                                                                                                                            |
|------------------------------------------------------------------------------------------------------------------------------|---------------------------------------------------------------------------------------------------------------------------------------------------------------------------------------------------------------------------------------|
| Age (Age in 5-year groups)                                                                                                   | 1=15-19; 2=20-29; 3=30-39; 4=40-49                                                                                                                                                                                                    |
| Region                                                                                                                       | 1=Tigray; 2=Afar; 3=Amhara; 4= Oromia; 5=Somali;<br>6=Benishangul-Gumuz; 7=SNNNP; 8=Gambella; 9=Harari;<br>10=Addis Ababa; 11=Dire Dawa                                                                                               |
| Place of residence                                                                                                           | 1=Urban; 2=Rural                                                                                                                                                                                                                      |
| Education level                                                                                                              | 1=No Education; 2= Primary; 3=Secondary; 4=Higher                                                                                                                                                                                     |
| Source of drinking water                                                                                                     | 1=piped water; 2=other improved (public taps, standpipes, tube wells, boreholes, protected dug wells and springs, and rainwater, bottled water); 3=unimproved (river, pond, unprotected spring and well)                              |
| Type of toilet facility                                                                                                      | 1= Improved (flush/pour flush toilets to piped sewer systems, septic tanks, and pit latrines; ventilated improved pit (VIP) latrines; pit latrines with slabs; and composting toilets);<br>2=Unimproved; 3=Open defecation; 4= Others |
| Religion                                                                                                                     | 1=Orthodox; 2=Protestant; 3=Muslim; 4= Others (Catholic, traditional, other)                                                                                                                                                          |
| Ethnicity                                                                                                                    | 1=Amhara; 2= Oromo; 3= Tigray; 4= Somali; 5= Sidama;<br>6=Gurage; 7=Welayta; 8=Hadya; 9=Other                                                                                                                                         |
| Wealth index                                                                                                                 | 1=Poorest; 2=Poorer; 3=Middle; 4=Richer; 5=Richest                                                                                                                                                                                    |
| Preceding birth interval (months)<br>(for index child- for youngest child) except the first birth, no interval for 1st birth | 1= <24 Months; 2= ≥24 Months                                                                                                                                                                                                          |
| Total children ever born                                                                                                     | 1=0; 2= 1-3; 3= 4+                                                                                                                                                                                                                    |
| Births in past year (number of births in the 12 months (not 0 to 11) prior to the month of interview)                        | 1= 0; 2= 1-2                                                                                                                                                                                                                          |
| Currently pregnant                                                                                                           | 0=No or unsure; 1=Yes                                                                                                                                                                                                                 |



|                                                                                |                                                                                          |
|--------------------------------------------------------------------------------|------------------------------------------------------------------------------------------|
| Births in the last three years (0 to 35 prior to the month of interview)       | 1= Yes; 2= No                                                                            |
| Current contraceptive use                                                      | 1= Yes; 2 = No                                                                           |
| Hemoglobin level adjusted for altitude and smoking (g/dl - 1 decimal)          | (g/dl - 1 decimal)                                                                       |
| Anemia                                                                         | 1=Anemic (Severe (<7 g/dl), Moderate (7-9.9 g/dl), Mild 10-10.9/11.9 g/dl); 2=Non-Anemic |
| BMI                                                                            | 1=<18.5; 2=18.5-24.9;3=>=25                                                              |
| Smoking                                                                        | 1=Yes; 2=No                                                                              |
| Current marital status                                                         | 1=Single; 2=Married/Living with partner;<br>3=Divorced/Widowed/Separated                 |
| During pregnancy, given or bought iron tablets/syrup for most recent pregnancy | 0=No; 1=Yes; 3= I Don't Know                                                             |
| Currently breastfeeding                                                        | 0=No; 1=Yes                                                                              |
| HIV test                                                                       | 1= Positive 2 = Negative                                                                 |

STROBE Statement—Checklist of items that should be included in reports of *cross-sectional studies*

Title: The Spatial Distribution and Determinant Factors of Anemia among Women of Reproductive Age in Ethiopia: A Multilevel and Spatial Analysis

|                              | Item No | Recommendation                                                                                                                                                                                    | Page numbers |
|------------------------------|---------|---------------------------------------------------------------------------------------------------------------------------------------------------------------------------------------------------|--------------|
| <b>Title and abstract</b>    | 1       | (a) Indicate the study's design with a commonly used term in the title or the abstract                                                                                                            | 1            |
|                              |         | (b) Provide in the abstract an informative and balanced summary of what was done and what was found                                                                                               | 2            |
| <b>Introduction</b>          |         |                                                                                                                                                                                                   |              |
| Background/rationale         | 2       | Explain the scientific background and rationale for the investigation being reported                                                                                                              | 3            |
| Objectives                   | 3       | State specific objectives, including any prespecified hypotheses                                                                                                                                  | 4            |
| <b>Methods</b>               |         |                                                                                                                                                                                                   |              |
| Study design                 | 4       | Present key elements of study design early in the paper                                                                                                                                           | 4            |
| Setting                      | 5       | Describe the setting, locations, and relevant dates, including periods of recruitment, exposure, follow-up, and data collection                                                                   | 4            |
| Participants                 | 6       | (a) Give the eligibility criteria, and the sources and methods of selection of participants                                                                                                       | 4,5          |
| Variables                    | 7       | Clearly define all outcomes, exposures, predictors, potential confounders, and effect modifiers. Give diagnostic criteria, if applicable                                                          | 5            |
| Data sources/<br>measurement | 8*      | For each variable of interest, give sources of data and details of methods of assessment (measurement). Describe comparability of assessment methods if there is more than one group              | 5            |
| Bias                         | 9       | Describe any efforts to address potential sources of bias                                                                                                                                         | 7            |
| Study size                   | 10      | Explain how the study size was arrived at                                                                                                                                                         | 5            |
| Quantitative variables       | 11      | Explain how quantitative variables were handled in the analyses. If applicable, describe which groupings were chosen and why                                                                      | 7            |
| Statistical methods          | 12      | (a) Describe all statistical methods, including those used to control for confounding                                                                                                             | 7,8          |
|                              |         | (b) Describe any methods used to examine subgroups and interactions                                                                                                                               | 8            |
|                              |         | (c) Explain how missing data were addressed                                                                                                                                                       | 7            |
|                              |         | (d) If applicable, describe analytical methods taking account of sampling strategy                                                                                                                | 8            |
|                              |         | (e) Describe any sensitivity analyses                                                                                                                                                             | 7            |
| <b>Results</b>               |         |                                                                                                                                                                                                   |              |
| Participants                 | 13*     | (a) Report numbers of individuals at each stage of study—eg numbers potentially eligible, examined for eligibility, confirmed eligible, included in the study, completing follow-up, and analysed | 9            |
|                              |         | (b) Give reasons for non-participation at each stage                                                                                                                                              | 9            |
|                              |         | (c) Consider use of a flow diagram                                                                                                                                                                | 9            |
| Descriptive data             | 14*     | (a) Give characteristics of study participants (eg demographic, clinical, social) and information on exposures and potential confounders                                                          | 9            |
|                              |         | (b) Indicate number of participants with missing data for each variable of interest                                                                                                               | 9            |

|                          |     |                                                                                                                                                                                                                                                                                                                                                                                                               |             |
|--------------------------|-----|---------------------------------------------------------------------------------------------------------------------------------------------------------------------------------------------------------------------------------------------------------------------------------------------------------------------------------------------------------------------------------------------------------------|-------------|
| Outcome data             | 15* | Report numbers of outcome events or summary measures                                                                                                                                                                                                                                                                                                                                                          | 9,10,11,12  |
| Main results             | 16  | (a) Give unadjusted estimates and, if applicable, confounder-adjusted estimates and their precision (eg, 95% confidence interval). Make clear which confounders were adjusted for and why they were included<br>(b) Report category boundaries when continuous variables were categorized<br>(c) If relevant, consider translating estimates of relative risk into absolute risk for a meaningful time period | 15,16,17,18 |
| Other analyses           | 17  | Report other analyses done—eg analyses of subgroups and interactions, and sensitivity analyses                                                                                                                                                                                                                                                                                                                |             |
| <b>Discussion</b>        |     |                                                                                                                                                                                                                                                                                                                                                                                                               |             |
| Key results              | 18  | Summarise key results with reference to study objectives                                                                                                                                                                                                                                                                                                                                                      | 21          |
| Limitations              | 19  | Discuss limitations of the study, taking into account sources of potential bias or imprecision. Discuss both direction and magnitude of any potential bias                                                                                                                                                                                                                                                    | 24          |
| Interpretation           | 20  | Give a cautious overall interpretation of results considering objectives, limitations, multiplicity of analyses, results from similar studies, and other relevant evidence                                                                                                                                                                                                                                    | 24          |
| Generalisability         | 21  | Discuss the generalisability (external validity) of the study results                                                                                                                                                                                                                                                                                                                                         | 22,23       |
| <b>Other information</b> |     |                                                                                                                                                                                                                                                                                                                                                                                                               |             |
| Funding                  | 22  | Give the source of funding and the role of the funders for the present study and, if applicable, for the original study on which the present article is based                                                                                                                                                                                                                                                 | 25          |

\*Give information separately for exposed and unexposed groups.

**Note:** An Explanation and Elaboration article discusses each checklist item and gives methodological background and published examples of transparent reporting. The STROBE checklist is best used in conjunction with this article (freely available on the Web sites of PLoS Medicine at <http://www.plosmedicine.org/>, Annals of Internal Medicine at <http://www.annals.org/>, and Epidemiology at <http://www.epidem.com/>). Information on the STROBE Initiative is available at [www.strobe-statement.org](http://www.strobe-statement.org).

# BMJ Open

## The Spatial Distribution and Determinant Factors of Anemia among Women of Reproductive Age in Ethiopia: A Multilevel and Spatial Analysis

|                                 |                                                                                                                                                                                                                                                                                                                                                                                                                                                                                                                              |
|---------------------------------|------------------------------------------------------------------------------------------------------------------------------------------------------------------------------------------------------------------------------------------------------------------------------------------------------------------------------------------------------------------------------------------------------------------------------------------------------------------------------------------------------------------------------|
| Journal:                        | <i>BMJ Open</i>                                                                                                                                                                                                                                                                                                                                                                                                                                                                                                              |
| Manuscript ID                   | bmjopen-2018-027276.R2                                                                                                                                                                                                                                                                                                                                                                                                                                                                                                       |
| Article Type:                   | Research                                                                                                                                                                                                                                                                                                                                                                                                                                                                                                                     |
| Date Submitted by the Author:   | 23-Jan-2019                                                                                                                                                                                                                                                                                                                                                                                                                                                                                                                  |
| Complete List of Authors:       | Kibret, Kelemu; University of Newcastle, Priority Research Center for Generational Health and Aging, School of Medicine & Public Health Chojenta, Catherine; The University of Newcastle Australia, Priority Research Centre for Generational Health and Ageing, School of Medicine and Public Health<br>Gresham, Eliie; Western New South Wales Local Health District, Health Intelligence Unit<br>Loxton, Deborah; University of Newcastle, Research Centre for Gender Health & Ageing, School of Medicine & Public Health |
| <b>Primary Subject Heading</b>: | Epidemiology                                                                                                                                                                                                                                                                                                                                                                                                                                                                                                                 |
| Secondary Subject Heading:      | Public health                                                                                                                                                                                                                                                                                                                                                                                                                                                                                                                |
| Keywords:                       | Anemia, spatial analysis, multilevel analysis, reproductive age women, women                                                                                                                                                                                                                                                                                                                                                                                                                                                 |
|                                 |                                                                                                                                                                                                                                                                                                                                                                                                                                                                                                                              |

SCHOLARONE™  
Manuscripts

1  
2  
3  
4  
5  
6  
7  
8  
9  
10  
11  
12  
13  
14  
15  
16  
17  
18  
19  
20  
21  
22  
23  
24  
25  
26  
27  
28  
29  
30  
31  
32  
33  
34  
35  
36  
37  
38  
39  
40  
41  
42  
43  
44  
45  
46  
47  
48  
49  
50  
51  
52  
53  
54  
55  
56  
57  
58  
59  
60

1 **The Spatial Distribution and Determinant Factors of Anemia among Women of**  
2 **Reproductive Age in Ethiopia: A Multilevel and Spatial Analysis**

3 Kelemu Tilahun Kibret<sup>1\*</sup>, Catherine Chojenta<sup>1</sup>, Ellie Gresham<sup>1,2</sup>, Deborah Loxton<sup>1</sup>

4 <sup>1</sup>Priority Research Centre for Generational Health and Ageing, School of Medicine and Public  
5 Health, University of Newcastle, Australia.

6 <sup>2</sup>Health Intelligence Unit, Western NSW Local Health District, Australia

7 \*Corresponding author: Kelemu Tilahun email [ktwu27@gmail.com](mailto:ktwu27@gmail.com) phone +61415649254

8

For peer review only

## 9 Abstract

10 **Objective:** The aim of this study was to assess the spatial distribution and determinant factors  
11 of anemia among reproductive age women in Ethiopia.

12 **Methods:** An in depth analysis of the 2016 Ethiopian Demographic and Health Survey data  
13 was undertaken. Getis-Ord  $G_i^*$  statistics were used to identify the hot and cold spot areas for  
14 anemia among women of reproductive age. A multilevel logistic regression model was used to  
15 identify independent predictors of anemia among women of reproductive age.

16 **Results:** Older age (adjusted odds ratio (AOR) = 0.75; 0.64, 0.96)), no education (AOR =  
17 1.37; 95 % CI: 1.102–1.72), lowest wealth quantile (AOR = 1.29; 95 % CI: 1.014-1.60),  
18 currently pregnant (AOR=1.28; 95% CI: 1.10, 1.51, currently breastfeeding (AOR =1.09; 95%  
19 CI: 1.025, 1.28), high gravidity (AOR=1.39; 95% CI: 1.13, 1.69), and HIV positive (AOR=  
20 2.11; 95% CI: 1.59, 2.79) are individual factors associated with the occurrence of anemia.  
21 Likewise, living in a rural area (AOR=1.29; 95%CI: 1.02, 1.63), and availability of unimproved  
22 latrine facilities (AOR = 1.18; 95 % CI: 1.01, 1.39) are community level factors associated with  
23 higher odds of anemia. The spatial analysis indicated that statistically high hotspots of anemia  
24 were observed in the eastern (Somali, Dire Dawa and Harari regions) and north-eastern (Afar)  
25 parts of the country.

26 **Conclusion:** The prevalence rate of anemia among women of reproductive age varied across  
27 the country. Significant hotspots/high prevalence of anemia was observed in the eastern and  
28 north-eastern parts of Ethiopia. Anemia prevention strategies need to be targeted on rural  
29 residents, women with limited to no education, women who are breastfeeding, areas with poor  
30 latrine facilities and women who are HIV positive.

31 Key words: Anemia, spatial analysis, multilevel analysis, reproductive age women, women

### 32 **Strength and limitation of this study**

- 33 ➤ Used large population-based data with a large sample size, which is representative of all  
34 regions of the country
- 35 ➤ A combination of statistical methods (spatial analysis and multilevel logistics analysis)  
36 were applied which allows understanding of the role of contextual and geographical factors  
37 in the occurrence of anemia among women of reproductive age
- 38 ➤ The cause effect and temporal relationship could not be established due to the cross  
39 sectional nature of the data
- 40 ➤ Essential factors such as dietary intake and behavioral factors were unable to be  
41 incorporated in the analysis

## 44 Introduction

45 Anemia refers to a low hemoglobin level (<11mg/dl for pregnant women and <12mg/dl for  
46 non-pregnant women) [1]. If an individual's hemoglobin level is low, the red blood cells are  
47 unable to carry adequate oxygen for the body's physiologic needs [1]. Anemia is a major  
48 public health problem in women and children under five years of age [2]. Worldwide, 38% of  
49 pregnant women, and 29% of non-pregnant women were anemic in 2011 [2]. Pregnant women  
50 in low and middle income countries (LMIC) experience high rates of anemia, in which the  
51 highest prevalence rates are reported in Central and West Africa (56%), South Asia (52%) and  
52 East Africa (36%) [2]. Similarly, a large proportion of non-pregnant women were reportedly  
53 anemic in West and Central Africa (48%), South Asia (47%) and East Africa (28%) [2].  
54 Anemia can have negative effects on a woman's health including maternal mortality and severe  
55 morbidity [3], depression [4, 5], raised blood pressure [6, 7], as well as negative influences  
56 on the infant including low birth weight and preterm birth [8]. Thus, anemia remains one of the  
57 global health priority areas at the global level, particularly in resource-limited settings [9].  
58 Reducing anemia is considered as an essential part of improving the health of women, and the  
59 World Health Organization (WHO) has set a global target of achieving 50% reduction of  
60 anemia among women of reproductive age by 2025 [10].

61 Anemia is also a common problem in Ethiopia; the recent Ethiopian Demographic Health  
62 Survey (EDHS 2016) reported 29% prevalence of anemia among pregnant women and 24%  
63 among women of reproductive age; these prevalence statistics ranging from 16% to 59%  
64 across different parts of the country [11]. Likewise, in several pocket studies from different  
65 parts of the country researchers reported varied anemia prevalence rates among pregnant  
66 women, which ranged from 17% in the north. [12], 32% in the south [13] and up to 44% [14]  
67 and 57% [15] in the eastern part of Ethiopia. Similarly, in different studies there was reported  
68 to be a 16% [16] prevalence of anemia among non-pregnant women and 29% [17] and 30%  
69 [18, 19] among women of reproductive age.

70 There are a number of different factors contributing to the burden of anemia, with iron  
71 deficiency the main cause of the disease [20]. Other micronutrients (vitamin A, vitamin B12,  
72 and folate), chronic bleeding, acute or chronic infections and parasitic infections (hookworm  
73 and malaria) are also known to cause anemia [16, 21-23]. Based on the geographic distribution  
74 and disease burden in LMIC, about half of anemia cases are attributable to a deficiency of iron  
75 and the remainder may be due to diseases like parasitic infections, malaria and Human Immune  
76 Deficiency Virus (HIV) [24]. A recent systematic review revealed that the proportion of anemia

1  
2  
3 77 caused by iron deficiency was below 50% in LMIC, with regional variations, poor sanitary  
4 78 conditions and subsequent increased occurrence of infections also contributing to anemia [25].  
5  
6

7 79 In Ethiopia, varied prevalence rates of anemia among women have been observed with  
8 80 different factors across different parts of the country [12, 15]. For instance, large family size,  
9 81 low education status, rural residence, hookworm infestation and HIV infection were identified  
10 82 as factors contributing to anemia in northern Ethiopia [12, 26], while in studies from the eastern  
11 83 area it was reported that multigravidas, third trimester of pregnancy and intestinal infestation  
12 84 were factors contributing to anemia during pregnancy [14, 27]. The variation in rates of anemia  
13 85 among women in Ethiopia might be due to the presence of diverse contextual and  
14 86 geographically variable factors including diet and the incidence of communicable diseases [9].  
15  
16

17 87 To date, spatial analyses have not been conducted to identify areas with hotspots (high  
18 88 prevalence rates) of anemia among reproductive age women in Ethiopia. Assessing the  
19 89 geographic distributions of anemia and the impact of risk factors on disease prevalence by area  
20 90 is important to prioritize and design targeted prevention and intervention programmes to  
21 91 address anemia in women [28]. In addition, the burden of anemia has been used as a  
22 92 measureable indicator of soil transmitted-helminthiasis, so understanding the geographical  
23 93 distribution of anemia can help target prevention and control mechanisms for parasitic  
24 94 infections such as these [29].  
25  
26

27 95 Thus, the aims of this study were to assess the spatial distribution and determinant factors of  
28 96 anemia among women of reproductive age women in Ethiopia.  
29  
30

## 31 97 **Methods**

### 32 98 **Patient and Public Involvement**

33 99 This study used a publicly available data set (EDHS 2016), therefore there were no patients or  
34 100 members of the public involved. The participants of this study were women of reproductive  
35 101 age (15-49 years). The mean ( $\pm$  standard deviation (sd)) age of the respondents was 28.2 years  
36 102 ( $\pm$ 9.2 years). The majority (78%) of the participants were rural residents and nearly two thirds  
37 103 (66%) were married or living with a partner. Almost half (48%) of the participants had no  
38 104 formal education.  
39  
40

### 41 105 **Study design and setting**

42 106 An in depth analysis of the EDHS 2016 data was undertaken for this study. EDHS 2016 was a  
43 107 population based cross sectional study conducted across the country. It is the fourth national  
44  
45  
46  
47  
48  
49  
50  
51  
52  
53  
54  
55  
56  
57  
58  
59  
60



1  
2  
3 108 survey conducted in all parts of Ethiopia (in nine regional states (Tigray, Afar, Amhara,  
4 109 Oromia, Somali, Benishangul-Gumuz, Southern Nations, Nationalities and Peoples' Region  
5 110 (SNNP), Gambella and Harari) and two city administrations (Addis Ababa and Dire Dawa))  
6  
7 111 [11]. In Ethiopia the states are administratively further subdivided into Zones, Zones into  
8  
9 112 *Woredas* and *Woredas* further into the lowest unit called *Kebeles*.

### 113 **Sampling and data measurements**

114 In the 2016 EDHS, stratified and cluster multistage sampling was used and it was intended to  
115 be representative at the regional and national level in terms of appropriate demographic and  
116 health indicators. In the first stage, 645 clusters of enumeration areas (EAs) (202 urban and  
117 443 rural) were identified using probability proportional to the size of EAs. In the second stage,  
118 a random sample of 18,008 households were selected from all the identified EAs. A total of  
119 15,683 women aged 15-49 years were interviewed and haemoglobin levels were measured for  
120 14,923 of them [11] (Figure 1). Data collection took place from January 18, 2016, to June 27,  
121 2016.

122 The sample size for EDHS was determined based on the multistage sampling procedure, taking  
123 into consideration the sampling variation. Standard errors were computed using the Taylor  
124 linearization method. The design effect, which is the ratio between the standard error with the  
125 given sample design and the standard error that would result if a simple random sample had  
126 been used, was determined [11].

127 Haemoglobin levels of the women were measured using HemoCue, which is the standard test  
128 used in the EDHS 2016, and all hemoglobin values were adjusted for both altitude and smoking  
129 status [11]. Pregnant women with a haemoglobin value <11 g/dl and non-pregnant women with  
130 a haemoglobin value <12 g/dl were considered anaemic [1]. Similarly, anemia was classified  
131 according to its severity as severe (hemoglobin value < 7 g/dl), moderate (7.0-9.9 g/dl) in all  
132 women and mild (10.0 – 10.9 g/dl) in pregnant women and non-pregnant women (10.0 – 11.9  
133 g/dl) [1].

### 134 **Explanatory variables (Determinant factors)**

135 Both individual and community level factors were used. The individual and community level  
136 factors included in this study are presented in Supplemental Table 1 with their definition and  
137 coding. The variables were selected based on the literature review for factors affecting anemia  
138 [12, 14, 26, 27]; and sociodemographic, maternal as well as community level factors were  
139 identified as important factors for the occurrence of anemia. Therefore, all the available  
140

1  
2  
3 140 variables in the data set were included for the analysis. Individual factors included age, religion,  
4  
5 141 marital status, educational status, body mass index (BMI), birth interval, use of contraceptives,  
6  
7 142 wealth index, family size, iron-folate intake and gravidity of women, while the community  
8  
9 143 level factors were residence (urban, rural), region, water source and latrine facility type.  
10  
11 144 Community level measures could also be driven by aggregating individual level variables, for  
12  
13 145 example, the proportion of women in the community who are in the top quantile of wealth  
14  
15 146 index and proportion of women in the community who have clean water access. Community  
16  
17 147 level factors describe the group of populations living in similar settings.

18 148 The assumption of independence of observation has been taken as a basis to determine which  
19  
20 149 variables are analysed at individual and community level. If the observations at the individual  
21  
22 150 level are independent, variables were treated as individual level factors. Whereas, if the  
23  
24 151 observations were clustered into higher levels of units and if several women have shared  
25  
26 152 features such as place of residence, types of water source, latrine facility and region that could  
27  
28 153 have the same effect on anemia among women in the locality, then variables are analysed at  
29  
30 154 the community level.

31 155

### 32 156 **Data analysis**

### 33 157 **Spatial analysis**

34  
35  
36  
37 158 Spatial analyses were performed using Geoda version 1.8.10 (geodacenter.github.io), QGIS  
38  
39 159 Version 2.18.0 (qgis.org) and ArcGIS software version 10.1 (arcgis.com), and base files of  
40  
41 160 the administrative regions for Ethiopia were obtained from DIVA (diva-gis.org). The spatial  
42  
43 161 analysis was conducted by joining the occurrence of anemia (as proportions) with each cluster  
44  
45 162 to the corresponding geospatial location (survey cluster values). The values of DHS data were  
46  
47 163 merged with the GPS dataset in Geoda software and these values were imported into the QGIS  
48  
49 164 software. Anemia proportions were then computed at lower (cluster), zonal and regional levels  
50  
51 165 using QGIS.

52 166 The spatial pattern of the rate of anemia among women of reproductive age was visualized  
53  
54 167 and a spatially smoothed proportion was obtained through empirical Bayes estimation methods  
55  
56 168 [30]. The smoothed proportions present clearer patterns, where the problem was most severe.  
57  
58 169 The spatial empirical Bayes "smooth" estimates technique was able to deal with spatial  
59  
60

1  
2  
3 170 heterogeneity. The estimation technique guarantees that estimates of neighbouring states are  
4  
5 171 more alike than estimates of states that are further away [31].  
6

7 172 A standardized prevalence rate (SPR), or the ratio of the observed prevalence rate to a national  
8  
9 173 prevalence rate, was determined using Geoda software [31]. Geoda implements this in the form  
10  
11 174 of an excess risk estimate as part of the map. The excess risk rate is the ratio of the observed  
12  
13 175 rate to the average rate computed for all the data [31].

14 176 Furthermore, a spatial analysis was performed to identify the clustering of anemia in women  
15  
16 177 or hotspot areas (the areas that have higher anemia prevalence rates compared to the national  
17  
18 178 average) in different regions of Ethiopia. Spatial analysis is an epidemiological method useful  
19  
20 179 to specify geographic areas with high or low rates of disease occurrence and variability over  
21  
22 180 the region or country [32]. Getis-Ord  $G_i^*$  statistics was used for this spatial analysis. Local  
23  
24 181 Getis-Ord  $G_i^*$  statistics [33] are important to identify the hot and cold spot areas for anemia in  
25  
26 182 reproductive age women using geographic poisoning system (GPS) latitude and longitude  
27  
28 183 coordinate readings which were taken at the nearest community centre for EAs or EDHS 2016  
29  
30 184 clusters [11]. An anemia hotspot refers to the occurrence of high prevalence rates of anemia  
31  
32 185 clustered together on the map, whereas cold spots refers to the occurrence of low prevalence  
33  
34 186 rates of anemia clustered together on the map [33].

35 187 A local Getis-Ord  $G$ -statistic tool in ArcGIS was used to calculate the spatial variability of high  
36  
37 188 and low prevalence rates of anemia among women of reproductive age. An autocorrelation can  
38  
39 189 be classified into positive and negative correlation through the Local Getis-Ord  $G$  statistics  
40  
41 190 [33]. Positive autocorrelation occurs when similar values clustered together on a map (high  
42  
43 191 rates surrounded by nearby high rates or low rates surrounded by nearby low rates). Negative  
44  
45 192 autocorrelation indicates different values clustered together on a map, that is, high values  
46  
47 193 surrounded by nearby low values or low values surrounded by nearby high values. Statistical  
48  
49 194 significance of autocorrelation was determined by  $z$ -scores and  $p$ -value with a 95 % level of  
50  
51 195 confidence. The distribution and variations of anemia prevalence rates among women across  
52  
53 196 the country were displayed on the map.

### 51 197 **Statistical analysis**

52  
53 198 The descriptive statistical analysis was performed using SPSS software version 24.0  
54  
55 199 ([www.spss.com](http://www.spss.com)) by complex sample analysis. Frequencies, percentage and standard deviation  
56  
57 200 were used for the descriptive analysis. Since some regions with small populations were  
58  
59 201 oversampled, while others with large population were underrepresented, the weighted  
60  
202 frequencies and percentages (based on population size of each region) were computed as a

203 correction. The detailed weighting procedure was described in EDHS 2016 report [11]. The  
 204 mean and standard deviation were computed for blood hemoglobin level. The mean  
 205 hemoglobin value was also compared across different independent categorical variables using  
 206 One-way Analysis of Variance (ANOVA) or independent t-test.

207 The Multivariable multilevel logistic regression model was used to determine the effect of  
 208 different factors on anemia among women. The analysis was performed by using SAS version  
 209 9.4 software (SAS North Carolina State University, [www.sas.com](http://www.sas.com)) using Proc Glimmix with  
 210 Laplace's method. For this multilevel analysis, four models were constructed. The first model  
 211 was constructed without independent variables to assess the effect of community variation on  
 212 anemia among women. Individual level factors were incorporated in the second model. In the  
 213 third model, community level factors were included. Finally, both individual and community  
 214 level factors were included in the fourth model.

215 The results of fixed effects were presented as odds ratio (OR) with 95% confidence intervals  
 216 (CIs). An adjusted odds ratio (AOR) with 95% CIs was computed to identify the independent  
 217 factors of anemia among women and a p-value <0.05 was used as a measure of statistical  
 218 significance. A multicollinearity test was done in order to rule out a significant correlation  
 219 between variables. If the values of variance inflation factor (VIF) was lower than 10, then the  
 220 collinearity problem was considered as less likely. The random effects (variation of effects)  
 221 were measured by intra-cluster correlation coefficient (ICC) (variance partition coefficient)  
 222 [34], percentage change in variance (PCV) [35] and median odds ratio (MOR) [34, 36] which  
 223 measure the variability between clusters in the multi-level models. ICC explains the cluster  
 224 variability while MOR can quantify unexplained cluster variability (heterogeneity). MOR  
 225 translates cluster variance into OR scale. In the multilevel model, PCV can measure the total  
 226 variation due to factors at the community and individual level [35]. The ICC, PCV and MOR  
 227 were determined using the estimated variance of clusters utilising the following formula [34,  
 228 35].

$$230 \quad ICC = \frac{V}{(V + \frac{\pi^2}{3})} \quad MOR = \exp\sqrt{2 \times V \times 0.6745} \sim \exp(0.95\sqrt{V})]$$

231 Where V is the estimated variance of clusters

232 And

$$233 \quad PCV = \frac{(V_A - V_B)}{V_B} \times 100$$

234 Where  $V_A$  = variance of the initial model;  $V_B$  = variance of the model with more terms

235 The multilevel analysis model is one of the analysis methods which can correctly handle the  
 236 correlated data [37]. A multilevel model evaluates how factors at different levels affect the  
 237 dependent variable. A multilevel model provides correct parameter estimates by correcting the  
 238 biases introduced from clustering by producing correct standard errors, thus producing correct  
 239 CI, and significance tests [37]

#### 240 **Ethical consideration**

241 Publicly available EDHS 2016 data was used for this study. The EDHS 2016 was approved by  
 242 the National Research Ethics Review Committee (NRERC) of Ethiopia and ICF Macro  
 243 International. MEASURE DHS approval was obtained to use EDHS 2016. Informed consent  
 244 was taken from each participant and all identifiers were removed. This analysis was approved  
 245 by the University of Newcastle Human Research Ethics Committee (H-2018-0045).

### 246 **Results**

#### 247 **Sociodemographic characteristics**

248 The data on 14,923 women were included in this analysis, including 642 clusters nested in 11  
 249 regions. The descriptive statistics of the study participants are presented in Table 1. The mean  
 250 ( $\pm$  sd) age of the respondents was 28.2 years ( $\pm$ 9.2 years). The majority of participants lived in  
 251 a rural area (78%). Nearly two-thirds (66%) of participants were married or living with a  
 252 partner. Almost half (48%) of the women had no formal education and around 43% were of  
 253 the Orthodox Tewahdo Christian religion. Only 18% of the households had access to a piped  
 254 water source for drinking, and 15% had access to an improved latrine facility. Nearly one-third  
 255 (N=4,657; 31.2%) of women were breastfeeding at the time of the survey (Table 1). The  
 256 average haemoglobin level among lactating mothers was 12.6 g/dl ( $\pm$ 1.7 g/dl) and about 28.3%  
 257 (95% CI: 25.7-31.0%) of these women were anemic.

258

259 Table 1: Sociodemographic and other health-related characteristics of study participants  
 260 included in the analysis, EDHS 2016 (N=14,923)

| Variables | Weighted<br>Frequency | Weighted<br>percent |
|-----------|-----------------------|---------------------|
| Age       |                       |                     |
| 15-19     | 3165                  | 21.2                |
| 20-29     | 5467                  | 36.6                |

|                            |       |      |
|----------------------------|-------|------|
| 30-39                      | 4078  | 27.3 |
| 40-49                      | 2213  | 14.8 |
| Place of residence         |       |      |
| Urban                      | 3169  | 21.2 |
| Rural                      | 11754 | 78.8 |
| Educational status         |       |      |
| No education               | 7215  | 48.3 |
| Primary                    | 5244  | 35.1 |
| Secondary                  | 1676  | 11.2 |
| Higher                     | 789   | 5.3  |
| Marital status             |       |      |
| Single                     | 3758  | 25.2 |
| Married                    | 9800  | 65.7 |
| Divorced/widowed/separated | 1365  | 9.1  |
| Religion                   |       |      |
| Orthodox                   | 6447  | 43.2 |
| Protestant                 | 3514  | 23.5 |
| Muslim                     | 4645  | 31.1 |
| Other                      | 317   | 2.1  |
| Region                     |       |      |
| Tigray                     | 1073  | 7.2  |
| Afar                       | 119   | 0.8  |
| Amhara                     | 3645  | 24.4 |
| Oromia                     | 5422  | 36.3 |
| Somali                     | 417   | 2.8  |
| Benishangul-Gumuz          | 146   | 1.0  |
| SNNPR                      | 3124  | 20.9 |
| Gambella                   | 42    | 0.3  |
| Harari                     | 32    | 0.2  |
| Addis Ababa                | 825   | 5.5  |
| Dire Dawa                  | 77    | 0.5  |
| Wealth index               |       |      |
| Poorest                    | 2519  | 16.9 |

|                                                       |       |      |
|-------------------------------------------------------|-------|------|
| Poorer                                                | 2717  | 18.2 |
| Middle                                                | 2891  | 19.4 |
| Richer                                                | 2979  | 20.0 |
| Richest                                               | 3816  | 25.6 |
| <b>BMI</b>                                            |       |      |
| <18.5                                                 | 3060  | 22.1 |
| 18.5-24.9                                             | 9740  | 70.5 |
| >=25                                                  | 1018  | 7.4  |
| <b>Birth interval</b>                                 |       |      |
| < 24 months                                           | 1415  | 18.3 |
| >= 24 months                                          | 6305  | 81.7 |
| <b>Current use of contraceptives</b>                  |       |      |
| Yes                                                   | 1088  | 7.3  |
| No                                                    | 13835 | 92.7 |
| <b>Iron folate intake during pregnancy (n = 7328)</b> |       |      |
| Yes                                                   | 3108  | 42.4 |
| No /don't know                                        | 4220  | 57.6 |
| <b>Gravidity of women (children ever born)</b>        |       |      |
| 0                                                     | 4745  | 31.8 |
| 1-3                                                   | 4715  | 31.6 |
| 4+                                                    | 5464  | 36.6 |
| <b>Children ever born in the preceding 5 years</b>    |       |      |
| 0                                                     | 7595  | 50.9 |
| 1                                                     | 4475  | 30.0 |
| 2+                                                    | 2852  | 19.1 |
| <b>Currently breastfeeding</b>                        |       |      |
| Yes                                                   | 4657  | 31.2 |
| No                                                    | 10266 | 68.8 |
| <b>Currently pregnant</b>                             |       |      |
| Yes                                                   | 1088  | 7.3  |
| No                                                    | 13835 | 92.7 |
| <b>Smoking</b>                                        |       |      |
| Yes                                                   | 96    | 0.6  |

|     |                                                                                        |             |      |
|-----|----------------------------------------------------------------------------------------|-------------|------|
| 261 | No                                                                                     | 14827       | 99.4 |
| 262 | Birth in the last year                                                                 |             |      |
| 263 | 0                                                                                      | 12474       | 83.6 |
| 264 | 1-2                                                                                    | 2449        | 16.4 |
| 265 | HIV test                                                                               |             |      |
| 266 | Positive                                                                               | 187         | 1.3  |
| 267 | Negative                                                                               | 14724       | 98.7 |
| 268 | Water source                                                                           |             |      |
| 269 | Piped water                                                                            | 2646        | 17.7 |
| 270 | Other improved                                                                         | 6926        | 46.4 |
| 271 | Unimproved                                                                             | 5351        | 35.9 |
| 272 | Latrine facility type                                                                  |             |      |
| 273 | Improved toilet                                                                        | 2231        | 14.9 |
| 274 | Unimproved toilet                                                                      | 7877        | 52.8 |
| 275 | Open defecation                                                                        | 4414        | 29.6 |
| 276 | Other                                                                                  | 401         | 2.7  |
| 277 | Anemia status                                                                          |             |      |
| 278 | Anemic                                                                                 | 3527        | 23.6 |
| 279 | Non-anemic                                                                             | 11396       | 76.4 |
| 280 | Proportion of women in the community who have clean water source , m(se)               | 64.1 (33.6) |      |
| 281 | Proportion of women in the community who have unimproved latrine facility; m(se)       | 85.1(25.0)  |      |
| 282 | Proportion of women in the community who are in lowest quantile of wealth index; m(se) | 35.1(30.0)  |      |
| 283 | Percentage of unimproved water per cluster; m(se)                                      | 35.9 (33.6) |      |

BMI= Body mass index; SNNP= Southern Nations, Nationalities and Peoples' Region; m= mean; se= standard error



286

287 **Prevalence rate of anemia among women**

288 Amongst all respondents, the mean ( $\pm$ sd) blood hemoglobin level (adjusted for altitude) was  
 289 12.8 g/dl ( $\pm$ 1.7 g/dl). The overall prevalence of anemia among women of reproductive age  
 290 across the country was 23.6% (95% CI: 22.0, 25.3). The prevalence of mild, moderate and  
 291 severe anemia among all women of reproductive age were 17.8% (95% CI: 16.7-19), 5.0%  
 292 (95% CI: 4.3-5.8) and 0.8% (95% CI: 0.5-1.2) respectively. There was regional variation in  
 293 anemia prevalence among women of reproductive age ( $p=0.0001$ ) and higher prevalence rates  
 294 observed in Afar, Somali, Gambella, Dire Dawa and Oromia regions. Lower prevalence of  
 295 anemia was observed in Addis Ababa, Tigray, and Amhara regions. Rural areas had a higher  
 296 prevalence, 25.4 (95% CI: 23.5, 27.4) of anemia in women than urban areas, 17.0 (95% CI:  
 297 14.4, 20.0) ( $p=0.0001$ ). The highest proportion of anemia among women were found in Somali  
 298 Regional States, while the lowest proportions were found in Addis Ababa city administration  
 299 (Table 2).

300 Table 2: The variation of anaemia prevalence rates across different regions and different  
 301 sociodemographic characteristics of women in Ethiopia, 2016

| Region                | Weighted frequency |            | Weighted<br>proportion of<br>anemia (95% CI) | p-value |
|-----------------------|--------------------|------------|----------------------------------------------|---------|
|                       | Anemic             | Non-anemic |                                              |         |
| Place of residence    |                    |            |                                              |         |
| Urban                 | 538                | 2630       | 17.0 (14.4,20.0)                             | 0.0001  |
| Rural                 | 2989               | 8766       | 25.4 (23.5, 27.4)                            |         |
| Region                |                    |            |                                              |         |
| Tigray                | 212                | 861        | 19.7 (16.8,23.0)                             | 0.0001  |
| Afar                  | 53                 | 66         | 44.7 (39.9,49.6)                             |         |
| Amhara                | 627                | 3019       | 17.2 (14.9,19.7)                             |         |
| Oromia                | 1480               | 3942       | 27.2 (23.8,31.1)                             |         |
| Somali                | 248                | 169        | 59.5 (55.2,63.7)                             |         |
| Benishangul-<br>Gumuz | 28                 | 118        | 19.2 (16.1,22.7)                             |         |
| SNNP                  | 704                | 2420       | 22.5 (19.4,26.0)                             |         |

|     |                         |      |       |                   |        |
|-----|-------------------------|------|-------|-------------------|--------|
| 302 | Gambella                | 11   | 31    | 26.1 (21.3,31.5)  |        |
| 303 | Harari                  | 9    | 23    | 27.7 (23.7,32.1)  |        |
| 304 | Addis Ababa             | 132  | 693   | 16 (13.5,18.8)    |        |
| 305 | Dire Dawa               | 23   | 54    | 30 (25.8,34.8)    |        |
| 306 | Education status        |      |       |                   |        |
| 307 | No education            | 2002 | 5212  | 27.8 (25.4,30.2)  | 0.0001 |
| 308 | Primary                 | 1136 | 4108  | 21.7(19.8,23.7)   |        |
| 309 | Secondary               | 297  | 1378  | 17.8 (14.9,21.0)  |        |
| 310 | Higher                  | 91   | 697   | 11.5(8.2,16.0)    |        |
| 311 | Wealth index            |      |       |                   |        |
| 312 | Poorest                 | 863  | 1656  | 34.3(29.7,39.1)   | 0.0001 |
| 313 | Poorer                  | 688  | 2028  | 25.3(22.6,28.3)   |        |
| 314 | Middle                  | 686  | 2205  | 23.7(21.2,26.5)   |        |
| 315 | Richer                  | 625  | 2354  | 21.0(18.6,23.6)   |        |
| 316 | Richest                 | 664  | 3152  | 17.4(15.1,19.9)   |        |
| 317 | Currently pregnant      |      |       |                   |        |
| 318 | Yes                     | 317  | 771   | 29.1 (24.9,33.7)  | 0.003  |
| 319 | No                      | 3210 | 10625 | 23.2 (21.6,24.9)  |        |
| 320 | Currently breastfeeding |      |       |                   |        |
| 321 | Yes                     | 1317 | 3340  | 28.3 (25.7,31.0)  | 0.0001 |
| 322 | No                      | 2210 | 8055  | 21.5 (20.0,23.2)  |        |
| 323 | Total                   | 3527 | 11396 | 23.6 (22.0, 25.3) |        |

322 Around 1,080 [7.3% (95% CI: 6.6, 8.1)] participants were pregnant at the time of the interview.  
 323 The mean hemoglobin level among pregnant women was 11.7 g/dl ( $\pm$ 1.8 g/dl) and 29.1% (95%  
 324 CI: 24.9-33.7) of these women were anemic. The prevalence of anemia was higher among  
 325 pregnant women, 29.1 (95% CI: 24.9, 33.7) than non-pregnant women, 23.2 (95% CI: 21.6,  
 326 24.9) ( $p= 0.003$ ) (Table 2). The mean hemoglobin value of women in their second and third  
 327 trimester was significantly lower compared to women in their first trimester ( $p = 0.001$ ). The

328 mean hemoglobin levels in pregnant women who had less than a 24 month birth interval (for  
 329 their most recent birth) was significantly lower compared to women who had a birth interval  
 330 of less than or equal to 24 months ( $p= 0.0001$ ). Similarly receiving iron folate supplements  
 331 during pregnancy improved the mean haemoglobin values in pregnant women (Table 3).

332

333 Table 3: Hemoglobin level among pregnant women in Ethiopia, 2016

| Variables                 | Number | Hemoglobin level<br>(g/dl) (mean(sd)) | P values of ANOVA<br>or independent t<br>test |
|---------------------------|--------|---------------------------------------|-----------------------------------------------|
| Children ever born (CEB)  | 1,088  |                                       | 0.0001                                        |
| 0                         | 213    | 12.1(1.7)                             |                                               |
| 1-3                       | 484    | 11.7(1.8)                             |                                               |
| 4+                        | 390    | 11.5 (1.8)                            |                                               |
| Pregnancy stage           | 1,088  |                                       | 0.0001                                        |
| 1 <sup>st</sup> trimester | 226    | 12.4 (1.7)                            |                                               |
| 2 <sup>nd</sup> trimester | 433    | 11.6 (1.6)                            |                                               |
| 3 <sup>rd</sup> trimester | 429    | 11.5 (1.9)                            |                                               |
| CEB in last 5 years       | 1,088  |                                       | 0.0001                                        |
| 0                         | 339    | 12.1 (1.7)                            |                                               |
| 1                         | 484    | 11.7 (1.8)                            |                                               |
| 2+                        | 265    | 11.4 (1.9)                            |                                               |
| Fe-Fol supplementation    | 749    |                                       | 0.018                                         |
| Yes                       | 251    | 11.8 (1.5)                            |                                               |
| No                        | 498    | 11.5 (1.9)                            |                                               |
| Birth interval            | 702    |                                       | 0.0001                                        |
| < 24 months               | 206    | 11.2 (2.0)                            |                                               |
| $\geq$ 24 months          | 497    | 11.9 (1.5)                            |                                               |

334

335 sd = standard deviation, Fe-Fol= Iron-folate, CEB = Children Ever Born

336

337

## 338 **Determinant factors of anemia among women of reproductive age**

### 339 **Multilevel Analysis (Fixed effect analysis)**

340 The results of multilevel logistic regression for the individual and community level variables  
341 are presented in Table 4. In the full model in which all individual and community level factors  
342 are included, residence, education, religion, wealth index, pregnancy and breastfeeding status,  
343 gravidity of women, and lack of availability of an improved latrine were factors significantly  
344 associated with anemia in women. The results of the multicollinearity test indicated that no  
345 collinearity problem existed, since the VIF value of all variables is lower than 10.

### 347 **Individual factors**

348 The average hemoglobin value was significantly different across age groups ( $p=0.0001$ ). The  
349 highest mean hemoglobin level, 13 g/dl was observed in the youngest (15-19 years) age group  
350 while the lowest mean hemoglobin level, 12.71 g/dl, in the 30-34 years age group. The general  
351 pattern indicated roughly linear decline among women aged 15-34 years (Figure 2). Women  
352 aged 40-49 years old were 25% less likely to be anemic compared to women in the youngest  
353 age group (15-19 years old) (AOR= 0.75 (0.64, 0.96). Those women with limited education  
354 were 1.37 times more likely to be anemic than women who completed higher education (AOR  
355 = 1.37; 95 % CI: 1.102–1.72). The odds of anemia increased by 29% (AOR = 1.29; 95 % CI:  
356 1.014-1.60) when comparing the poorest to the richest women. The odds of anemia were higher  
357 in women who were pregnant (AOR=1.28; 95% CI: 1.10, 1.51) compared to those who were  
358 not pregnant. Women who were currently breastfeeding were 9% (AOR =1.09; 95% CI: 1.025,  
359 1.28) more likely to be anemic. The odds of anemia were 39% higher among mothers who had  
360 given birth to four or more children (AOR=1.39; 95% CI: 1.13, 1.69). Women who gave birth  
361 to two or more children in the preceding five years of the survey were at higher risk of having  
362 anemia (AOR =1.31; 95% CI: 1.09,1.57). In this study, women who were HIV positive had a  
363 twofold increased odds of having anemia compared to women classified as HIV negative  
364 (AOR= 2.11; 95% CI: 1.59, 2.79) (Table 4).

### 365 **Community level factors**

366 Living in a rural area was associated with a 29% higher odds of anemia among women of  
367 reproductive age than women who were urban residents (AOR=1.29; 95%CI: 1.02, 1.63).  
368 Women from households without access to a latrine had 18% higher odds of anemia compared  
369 to women from households that had an improved latrine facility (AOR = 1.18; 95 % CI: 1.01,  
370 1.39). Higher odds of anemia were observed in Somali regional state (AOR = 2.16; 95 % CI:

371 1.58, 2.90) compared to Dire Dawa. However, the odds of anemia among women were lower  
 372 in Gambella, Addis Ababa, Amhara and Oromia region compared to Dire Dawa (Table 4).

### 373 **Multilevel analysis (random effect analysis)**

374 The results of the random effects model is shown in Table 4. Prevalence rate of anemia varied  
 375 across communities ( $t^2=0.88$ ,  $p=<0.0001$ ). In other words, the anemia prevalence rate was not  
 376 similarly distributed across the communities. About 21% of the variance in the odds of anemia  
 377 in women could be attributed to community level factors, as calculated by the ICC based on  
 378 estimated intercept component variance. After adjusting for individual and community level  
 379 factors, the variation in anemia across communities remained statistically significant. About  
 380 16% of the odds of anemia variation across communities was observed in the full model (Model  
 381 4) (Table 4).

382 Moreover, the MOR indicated that anemia was attributed to community level factors. The  
 383 MOR for anemia was 2.44 in the empty model (Model 1); this showed that there was variation  
 384 between communities (clustering) since MOR was 2.4 times higher than the reference (MOR  
 385 = 1). The unexplained community variation in anemia decreased to MOR of 2.1 when all  
 386 factors were added to the null model (empty model). This indicates that when all factors are  
 387 included, the effect of clustering is still statistically significant in the full model (Table 4).

388  
 389 Table 4: Determinant factors bivariate association between anemia and individual and  
 390 community contextual characteristics of Ethiopian women, 2016

| Variables                       | Model 1 | Model 2            | Model 3                 | Model 4                              |
|---------------------------------|---------|--------------------|-------------------------|--------------------------------------|
|                                 |         | Individual factors | Community level factors | Individual + community level factors |
| <b>Individual level factors</b> |         |                    |                         |                                      |
| Age                             |         |                    |                         |                                      |
| 15-19                           |         | 1                  |                         | 1                                    |
| 20-29                           |         | 0.93 (0.81,1.07)   |                         | 0.96 (0.82, 1.19)                    |
| 30-39                           |         | 0.89 (0.75,1.10)   |                         | 0.92 (0.78,1.11)                     |
| 40-49                           |         | 0.76 (0.61,0.92 )  |                         | 0.75 (0.64,0.96)                     |
| Educational status              |         |                    |                         |                                      |
| No education                    |         | 1.41 (1.13,1.76)   |                         | 1.37 (1.10, 1.72)                    |
| Primary                         |         | 1.22 (0.99,1.51)   |                         | 1.24 (1.00,1.53)                     |

|                                               |                   |                    |
|-----------------------------------------------|-------------------|--------------------|
| Secondary                                     | 1.22 (0.98,1.5)   | 1.23(0.98,1.52)    |
| Higher                                        | 1                 | 1                  |
| Marital status                                |                   |                    |
| Single                                        | 0.99 (0.80, 1.22) | 0.972 (0.81,1.22)  |
| Married                                       | 1.07 (0.92, 1.23) | 1.09 (0.91,1.23)   |
| Divorced/widowe<br>d/separated                | 1                 | 1                  |
| Religion                                      |                   |                    |
| Orthodox                                      | 1                 |                    |
| Protestant                                    | 1.36 (1.16, 1.58) | 1.37 (1.15,1.63)   |
| Muslim                                        | 2.04 (1.79, 2.33) | 1.36 (1.16, 1.58)  |
| Other                                         | 1.49 (1.05, 2.12) | 1.525 (1.06, 2.13) |
| Wealth index                                  |                   |                    |
| Poorest                                       | 1.73 (1.48, 2.03) | 1.29 (1.014,1.60)  |
| Poorer                                        | 1.31 (1.10, 1.54) | 1.21 (0.96,1.45)   |
| Middle                                        | 1.28 (1.08,1.51)  | 1.22 (0.98,1.50)   |
| Richer                                        | 1.04 (0.88,1.24)  | 1.01(0.82,1.24)    |
| Richest                                       | 1                 | 1                  |
| Current using contraceptives                  |                   |                    |
| Yes                                           | 0.99 (0.90,1.10)  | 1.0 (0.91,1.11)    |
| No                                            | 1                 | 1                  |
| Currently pregnant                            |                   |                    |
| Yes                                           | 1.30 (1.11,1.52)  | 1.28 (1.10,1.51)   |
| no                                            | 1                 | 1                  |
| Currently breastfeeding                       |                   |                    |
| yes                                           | 1.12 (1.00,1.24)  | 1.09 (1.03,1.28)   |
| No                                            | 1                 | 1                  |
| Gravidity of women (total children ever born) |                   |                    |
| 0                                             | 1                 | 1                  |
| 1-3                                           | 1.23 (1.03,1.46)  | 1.22 (1.02,1.44)   |
| 4+                                            | 1.40 (1.15,1.72)  | 1.39 (1.13,1.69)   |
| Smoking                                       |                   |                    |
| Yes                                           | 0.98 (0.64,1.50)  | 1.05 (0.69,1.61)   |

1  
2  
3  
4  
5  
6  
7  
8  
9  
10  
11  
12  
13  
14  
15  
16  
17  
18  
19  
20  
21  
22  
23  
24  
25  
26  
27  
28  
29  
30  
31  
32  
33  
34  
35  
36  
37  
38  
39  
40  
41  
42  
43  
44  
45  
46  
47  
48  
49  
50  
51  
52  
53  
54  
55  
56  
57  
58  
59  
60

|                                         |                   |                   |
|-----------------------------------------|-------------------|-------------------|
| No                                      | 1                 | 1                 |
| Birth in the last 1 year                |                   |                   |
| 0                                       | 1                 | 1                 |
| 1-2                                     | 1.20 (1.05,1.37)  | 1.15 (1.01,1.32)  |
| Children ever born in preceding 5 years |                   |                   |
| 0                                       | 1                 | 1                 |
| 1                                       | 1.12 (0.96,1.29)  | 1.10 (0.95,1.27)  |
| 2+                                      | 1.39 (1.16,1.66)  | 1.31 (1.09,1.57)  |
| HIV test                                |                   |                   |
| Positive                                | 2.19 (1.65, 2.91) | 2.11 (1.59, 2.79) |
| Negative                                | 1                 | 1                 |
| <b>Community level factors</b>          |                   |                   |
| Place of residence                      |                   |                   |
| Urban                                   | 1                 | 1                 |
| Rural                                   | 1.67 (1.35,2.05)  | 1.29(1.02,1.63)   |
| Region                                  |                   |                   |
| Tigray                                  | 0.39(0.28,0.53)   | 0.52(0.38, 0.72)  |
| Afar                                    | 1.25 (0.91,1.7)   | 1.14 (0.83,1.56)  |
| Amhara                                  | 0.30 (0.22,0.41)  | 0.39 (0.28,0.54)  |
| Oromia                                  | 0.55 (0.41,0.75)  | 0.57 (0.42,0.78)  |
| Somali                                  | 2.40 (1.78,3.27)  | 2.16 (1.58,2.90)  |
| Benishangul-                            | 0.36 (0.25,0.50)  | 0.37 (0.26,0.52)  |
| Gumuz                                   |                   |                   |
| SNNPR                                   | 0.40 (0.29,0.54)  | 0.41(0.29,0.57)   |
| Gambella                                | 0.63 (0.45,0.87)  | 0.63(0.45,0.89)   |
| Harari                                  | 0.74 (0.53,1.04)  | 0.76(0.54,1.04)   |
| Addis Ababa                             | 0.54 (0.39,0.73)  | 0.67(0.49,0.91)   |
| Dire Dawa                               | 1                 | 1                 |
| Water source                            |                   |                   |
| Piped water                             | 1                 | 1                 |
| Other improved                          | 1.15 (0.95,1.39)  | 1.04 (0.86,1.26)  |
| Un-improved                             | 1.18 (0.95,1.44)  | 1.03 (0.83,1.27)  |
| Latrine facility type                   |                   |                   |

|                                                                              |              |            |                  |                  |
|------------------------------------------------------------------------------|--------------|------------|------------------|------------------|
| Improved toilet                                                              |              |            | 1                | 1                |
| Unimproved toilet                                                            |              |            | 1.12 (0.97,1.29) | 1.08 (0.94,1.25) |
| Open defecation                                                              |              |            | 1.33 (1.15,1.55) | 1.18 (1.00,1.39) |
| Other                                                                        |              |            | 0.86 (0.64,1.17) | 0.94 (0.69,1.27) |
| <b>Random effects (effect of variation/ measure of variation for anemia)</b> |              |            |                  |                  |
| Community level                                                              | 0.888 (0.07) | 0.46(0.05) | 0.32(0.04)       | 0.31(0.035)      |
| variance (SE)                                                                |              |            |                  |                  |
| P- value                                                                     | 0.001        | 0.001      | 0.001            | 0.001            |
| DIC(-2log likelihood)                                                        | 7926.056     | 7749.25    | 7720.74          | 7613.56          |
| ICC (%)                                                                      | 21.25        | 16.1       | 18.3             | 15.86            |
| Explained variation –PCV (%)                                                 | Reference    | 40.95      | 21.0             | 43.1             |
| MOR                                                                          | 2.44         | 2.13       | 2.3              | 2.1              |

391

392 Note: Model 1= empty model (without the predictors); Model 2= adjusted for individual  
 393 factors; Model 3 = adjusted for community level factors; Model 4 = adjusted for both  
 394 community and individual level factors; DIC = Deviance Information Criterion; ICC= Intra-  
 395 cluster Correlation Coefficient; MOR= Median Odds Ratio; PCV = Percentage Change in  
 396 Variance; SE= Standard Error; SNNPR=Southern Nations, Nationalities and Peoples' Region

397



## 398 **Spatial data analysis**

399 Figure 3 displays the empirical Bayes smoothed proportion estimate of anemia among women  
400 across regions in Ethiopia. A severe anemia prevalence rate ( $\geq 40\%$ ) among women of  
401 reproductive age was observed in Afar and Somali Regional States. Likewise, a moderate  
402 anemia prevalence rate (20-40%) occurred in Oromia, Gambella, SNNPR, Harari and Dire  
403 Dawa Regional States. Whereas, and a mild anemia prevalence rate ( $< 20\%$ ) was observed in  
404 Tigray and Amhara Regional States and Addis Ababa.

405 Similarly, the standardized prevalence ratio by regions (standardized to the national average  
406 prevalence of 23.6%), ranging from 0.63 to 2.39, was displayed on the map (Figure 3). A higher  
407 prevalence ratio of anemia was observed in Somali (2.39), Afar (1.8) Oromia (1.17), Dire Dawa  
408 1.15, Gambella (1.12) regional states (Figure 4); whereas, a lower prevalence ratio of anemia  
409 occurred in other regional states - Addis Ababa (0.64), Amhara (0.76), Benishangul-Gumuz  
410 (0.79), SNNPR (0.96), Tigray (0.85)

411 Figure 5 displays the smoothed anemia prevalence rates at zonal level where higher anemia  
412 rates were observed in all zones in Afar and Somali regions, as well as in some zones in Oromia.  
413 Likewise, the higher standardized ratio of anemia was observed in all zones in Afar and Somali  
414 regions as well as in some zones in Oromia (Figure 6).

415 The spatial distributions of anemia among women at the lower level (cluster level) is displayed  
416 in figure 6. The spatial investigation at the cluster level indicated that statistically high hotspots  
417 of anemia were observed in the eastern (Somali, Dire Dawa and Harari regions) and in north-  
418 eastern (Afar) parts of the country, while cold spots of anemia were observed in the northern  
419 (Tigray, Amhara), central (Addis Ababa, Oromia) and western (Benishangul-Gumuz and  
420 Gambella) parts of the country (Figure 7).

## 421 **Discussion**

422 Approximately a quarter of women of reproductive age were anemic in the current study,  
423 indicating that anemia is a moderate public health problem at the national level in Ethiopia [1].  
424 However, geographic differences demonstrated that anemia is a serious public health problem  
425 in five of the 11 Ethiopian states. A higher proportion of anemia cases was observed in the  
426 eastern and north-eastern parts of the country, which are less developed compared to other  
427 Ethiopian states in terms of economy, gender, health care facility and food availability [38].  
428 The geographical difference of anaemia across the regional states might be attributable to the  
429 regional variation of food consumption preferences [39, 40], the occurrence of communicable

1  
2  
3 430 diseases [41], and differences in availability of health care facilities [42]. In addition, lack of  
4  
5 431 clean water and unimproved latrine facilities would increase the occurrence of soil transmitted  
6  
7 432 infection [43] which in turn could lead to anemia [44]; which might explain some of the  
8  
9 433 observed geographical differences.

10  
11 434 According to the final model, both individual and community level factors were responsible  
12  
13 435 for about 43% of the disparity of anemia prevalence rates among women of reproductive age  
14  
15 436 in Ethiopia. After adjusting for all factors in the model, the likelihood of having anemia was  
16  
17 437 higher among those of younger age, with lower levels of education, living in rural areas, in the  
18  
19 438 lowest wealth quantile, who were currently pregnant or breastfeeding, with high gravidity, who  
20  
21 439 had given birth in the year prior to the survey and who were without access to an improved  
22  
23 440 latrine facility.

24  
25 441 Women aged 40-49 years had a lower likelihood of being anemic compared to women aged  
26  
27 442 between 15-19 years. This finding is in line with other study findings from Ethiopia [16, 19]  
28  
29 443 and Benin [45]. This could be due to the fact that low fertility rates occurred in this age group  
30  
31 444 (40-49) [11]. However, in Iran [46] it has been reported that women aged 20-24 were less likely  
32  
33 445 to be anemic compared to those aged 45-49; this might be a result of Iran having a targeted  
34  
35 446 intervention for younger women or women of reproductive age [46].

36  
37 447 In this study, it was found that there is variation of the anemia rate in terms of education status  
38  
39 448 of the women. A higher proportion of anemic cases were observed among women with no  
40  
41 449 education. It was found that women who did not have formal education had higher odds of  
42  
43 450 anemia than those with higher education. This is consistent with other studies conducted in  
44  
45 451 developing countries [24] including Ethiopia [16], Timor-Leste [47], Benin [45] and India [48,  
46  
47 452 49] in which it was reported that a low level of education was associated with higher odds of  
48  
49 453 anemia among women of reproductive age. Formal education might assist women to obtain  
50  
51 454 knowledge that in turn helps them to follow better lifestyle behaviours like good nutrition, and  
52  
53 455 to form better health-seeking habits and hygiene practices that can prevent anemia among  
54  
55 456 women.

56  
57 457 A higher proportion of anemic cases were observed among women in the poorest wealth  
58  
59 458 quantile. The lowest wealth quantile compared to highest quantile was associated with a higher  
60  
459 risk of anemia. Results of this study show that women who were in the poorest wealth quintile  
460  
461 460 were 30% more likely to be anemic than women who belong to the richest quintile; this is in  
line with the results of other studies conducted in other developing countries [24] like Benin

1  
2  
3 462 [45] and India [49, 50]. This might be due to the fact that having a low income would mean  
4 463 having less money to buy nutritious foods or have a balanced diet [51, 52], which in turn leads  
5 464 to inadequate nutrient intake and nutritional status [53]. More than 38% of the Ethiopian  
6 465 population belongs to the poor and poorest wealth quintile, which indicates a large percentage  
7 466 of women are at risk for anemia because of low socioeconomic position [11].  
8  
9

10 467 Lactating mothers were 9% more likely to have anemia than non-lactating mothers. Lactating  
11 468 may predispose women to low haemoglobin, which results in anemia. In a study conducted in  
12 469 India [54], a similar finding was reported, that lactating mothers were more likely to be anemic  
13 470 than non-lactating women.  
14  
15

16 471 The findings of our study clearly show the role of women's fertility in anemia. Increased odds  
17 472 of anemia was associated with high gravidity, births in the past five years of the survey and  
18 473 having a birth in the last year. Similar studies in Ethiopia [16], Iran [46] and Timor-Leste [47]  
19 474 also document this association between parity and risk of anemia. The study results from  
20 475 Pakistan [55, 56] and Iran [46] indicate that women with a parity of four or more were found  
21 476 to be at increased risk of anaemia than women with lower parity. This might be explained by  
22 477 that fact that the more the women give birth, the more they are exposed to blood loss which in  
23 478 turn results in low hemoglobin levels in the blood [57]. Similarly, prior births may deplete  
24 479 maternal iron stores due to the increased nutritional demands of pregnancy and puerperal blood  
25 480 loss [58]. Consequently, emphasis needs to be placed on family planning services. Increased  
26 481 odds of anemia were observed in women who were HIV positive. In this study, women who  
27 482 were HIV positive had twofold increased odds for anemia. This could be due to the direct  
28 483 effects of the HIV infection on the bone marrow and depletion of hemoglobin levels in the  
29 484 blood [59]. Many of the opportunistic infections to which HIV patients are susceptible might  
30 485 also lead to anemia [59].  
31  
32  
33  
34  
35  
36  
37  
38  
39  
40  
41  
42  
43  
44  
45

46 486 This study revealed there to be a significant difference in the proportion of anemic cases  
47 487 according to place of residence (urban/rural). The likelihood of having anemia was higher for  
48 488 rural residents compared to urban residents. This is in agreement with a study conducted in low  
49 489 income countries in which it was revealed that living in a rural area was a determinant factor  
50 490 for anemia [24]. A recent report illustrated that more than half of the Ethiopian population had  
51 491 access to unimproved toilet facilities [60]. Our study findings revealed that women from  
52 492 households with unimproved latrine facilities were more likely to be anemic than women from  
53 493 households with improved latrine facilities, which is in agreement with other research findings  
54  
55  
56  
57  
58  
59  
60

1  
2  
3 494 [45, 61]. The possible justification might be that an unimproved latrine facility would expose  
4  
5 495 women to helminthic infections [43], which in turn resulted them developing anemia [44].  
6

### 7 496 **Strength and Limitations**

9 497 This study used large population-based data with a large sample size, which is representative  
10  
11 498 of all regions of Ethiopia. Furthermore, a combination of statistical methods (spatial analysis  
12  
13 499 and multilevel logistics analysis) were applied for this study which allows for the understanding  
14  
15 500 of the role of contextual and geographical factors in the occurrence of anemia among women  
16  
17 501 of reproductive age. Due to the cross sectional nature of the EDHS data, the cause/effect and  
18  
19 502 temporal relationship could not be established based on these study findings. Similarly,  
20  
21 503 essential factors such as dietary intake and behavioural factors were not available in the EDHS  
22  
23 504 survey so that it was not possible to incorporate these variables in the analysis. Furthermore,  
24  
25 505 EDHS was a questionnaire based survey and relied on the memory of the respondents, and as  
26  
27 506 such, recall bias in the results might be a weakness for this study.

### 26 507 **Conclusion**

28 508 This study indicates that considerable geographic disparities in anemia prevalence rate occur  
29  
30 509 within Ethiopia. The results of this study revealed that anemia among women varied across the  
31  
32 510 country; significant anemia hotspots were observed in the eastern and north eastern part of the  
33  
34 511 country while anemia cold spots were observed in the northern and western parts of the country.  
35  
36 512 About 43% of the disparity in anemia occurrence across communities was attributable to both  
37  
38 513 individual and community level factors. The increased occurrence of anemia among women  
39  
40 514 was associated with individual and community level factors. For women, being of rural  
41  
42 515 residence, having no formal education, being in the poorest wealth index, either currently  
43  
44 516 pregnant or breastfeeding, and higher gravidity were factors that increased the odds of anemia  
45  
46 517 at the individual level, whereas lack of a clean water source, and access to an unimproved toilet  
47  
48 518 facility were factors significantly associated with anemia among women.

49  
50 519 Accordingly, the prevention of anemia among women requires multifaceted intervention  
51  
52 520 approaches, for instance, improving the economic and educational status of women, and  
53  
54 521 improving the availability of clean water and toilet facilities. Anemia prevention strategies  
55  
56 522 must be targeted on these identified factors. Priority should be given for those states or areas  
57  
58 523 which have anemia hotspots. Particularly, any intervention programs need to be prioritized for  
59  
60 524 pregnant women, women recently giving birth, those with lower levels of education, and  
525 women living in rural areas. The regions with the greatest numbers of anemic women (Afar

1  
2  
3 526 and Somali) should be prioritized, as the burden of anemia is higher in these areas, with more  
4  
5 527 than 50% of women being anemic.

6  
7 528 **Acknowledgments**

8  
9 529 We would like to thank the DHS program for allowing the use of EDHS data for this study.

10  
11 530 We are also very grateful to Dr Ryan O'Neill for his help in language editing.

12  
13 531 **Authors' contributions**

14  
15 532 Formulating the research question(s): KTK CC DL EG; designing the study: KTK CC DL

16  
17 533 EG; analysing the data: KTK Interpreting the results: KTK CC DL EG; drafting, writing,

18  
19 534 reviewing and approving the final manuscript: KTK CC DL EG.

20  
21 535 **Financial support**

22  
23 536 This research received no specific grant from any funding agency, or the commercial or not-

24  
25 537 for-profit sectors.

26  
27 538 **Conflicts of interest**

28  
29 539 The authors declare that they have no conflicting interests.

30  
31 540 **Data sharing statement**

32  
33 541 This study was an in-depth analysis of a publicly available dataset from the Demographic and

34  
35 542 Health Surveys Program (DHS Program). The dataset is available at the DHS program website

36  
37 543 (<http://www.measuredhs.com>)

38  
39 544

546 Figure 1: Selection of the Sample in the 2016 EDH Survey

547 Figure 2: Average hemoglobin value with 95% CI for women of reproductive age at different  
548 age groups, Ethiopia, 2016

549 Figure 3. Spatial Empirical Bayesian smoothed (SEBS) percentage of anemia among women  
550 of reproductive age across regions, EDHS, 2016

551 Figure 4. Standardized prevalence ratio for anemia among women of reproductive age across  
552 the regions in Ethiopia (standardized to national prevalence of 23.6%), EDHS, 2016

553 Figure 5. Spatial Empirical Bayesian smoothed (SEBS) percentage of anemia among women  
554 of reproductive age across Zones, EDHS, 2016

555 Figure 6. Standardized prevalence ratio for anemia among women of reproductive age across  
556 Zones in Ethiopia (standardized to national prevalence of 23.6%), EDHS, 2016

557 Figure 7. Spatial pattern of hotspots and cold spots of anemia rate among women of  
558 reproductive age at cluster level in Ethiopia, EDHS, 2016

559

## 560 References

- 561 1. WHO Haemoglobin concentrations for the diagnosis of anaemia and assessment of severity. Vitamin and Mineral Nutrition Information System. Geneva, World Health Organization, 2011 (WHO/NMH/NHD/MNM/11.1) (<http://www.who.int/vmnis/indicators/haemoglobin.pdf>, accessed on Jan 9, 2017). 2011.
- 562 563 564 2. Stevens GA, Finucane MM, De-Regil LM, et al. Global, regional, and national trends in haemoglobin concentration and prevalence of total and severe anaemia in children and pregnant and non-pregnant women for 1995–2011: a systematic analysis of population-representative data. *The Lancet Global Health* 2013; 1(1):e16-e25.
- 565 566 567 3. Lumbiganon P, Laopaiboon M, Intarut N, et al. Indirect causes of severe adverse maternal outcomes: a secondary analysis of the WHO Multicountry Survey on Maternal and Newborn Health. *BJOG* 2014; 121 Suppl 1:32-9.
- 568 569 570 4. Albacar G, Sans T, Martin-Santos R, et al. An association between plasma ferritin concentrations measured 48 h after delivery and postpartum depression. *J Affect Disord* 2011; 131(1-3):136-42.
- 571 572 573 5. Corwin EJ, Murray-Kolb LE, Beard JL. Low Hemoglobin Level Is a Risk Factor for Postpartum Depression. *J Nutr* 2003; 133:4139–42.
- 574 575 576 6. Aghamohammadi A, Zafari M, Tofighi M. High maternal hemoglobin concentration in first trimester as risk factor for pregnancy induced hypertension. *Caspian J Intern Med* 2011; 2(1):194-7.
- 577 578 579 7. Zafar T, IQBAL Z. IRON STATUS IN PREECLAMPSIA. *Professional Med J Mar* 2008; 15(1):74-80.
- 580 581 582 8. Rahman MM, Abe SK, Rahman MS, et al. Maternal anemia and risk of adverse birth and health outcomes in low- and middle-income countries: systematic review and meta-analysis. *American Journal of Clinical Nutrition* 2016; 103(2):495-504.
- 583 584 585 9. Kassebaum NJ, Jasrasaria R, Naghavi M, et al. A systematic analysis of global anemia burden from 1990 to 2010. *Blood* 2014; 123(5):615-24.
- 586

- 1  
2  
3 587 10. WHO Global nutrition targets 2025: anaemia policy brief (WHO/NMH/NHD/14.4). Geneva:  
4 588 World Health Organization; 2014.  
5 589 [http://apps.who.int/iris/bitstream/10665/148556/1/WHO\\_NMH\\_NHD\\_14.4\\_eng.pdf?](http://apps.who.int/iris/bitstream/10665/148556/1/WHO_NMH_NHD_14.4_eng.pdf?),  
6 590 Accessed on August 27,2017). 2014.  
7 591 11. Central Statistical Agency (CSA) [Ethiopia] and ICF Ethiopia Demographic and Health Survey  
8 592 2016. Addis Ababa, Ethiopia, and Rockville, Maryland, USA: CSA and ICF. 2016.  
9 593 12. Melku M, Addis Z, Alem M, et al. Prevalence and Predictors of Maternal Anemia during  
10 594 Pregnancy in Gondar, Northwest Ethiopia: An Institutional Based Cross-Sectional Study.  
11 595 *Anemia* 2014; 2014:108593.  
12 596 13. Gebremedhin S, Enquesselassie F, Umata M Prevalence and Correlates of Maternal Anemia in  
13 597 Rural Sidama, Southern Ethiopia. *African Journal of Reproductive Health / La Revue Africaine*  
14 598 *de la Santé; Reproductive* 2014; 18(1):44-53.  
15 599 14. Kedir H, Berhane Y, Worku A Khat chewing and restrictive dietary behaviors are associated  
16 600 with anemia among pregnant women in high prevalence rural communities in eastern  
17 601 Ethiopia. *PLoS One* 2013; 8(11):e78601.  
18 602 15. Addis Alene K, Mohamed Dohe A Prevalence of Anemia and Associated Factors among  
19 603 Pregnant Women in an Urban Area of Eastern Ethiopia. *Anemia* 2014; 2014:561567.  
20 604 16. Asres Y, Yemane T, Gedefaw L Determinant Factors of Anemia among Nonpregnant Women  
21 605 of Childbearing Age in Southwest Ethiopia: A Community Based Study. *Int Sch Res Notices*  
22 606 2014; 2014:391580.  
23 607 17. Haidar JA, Pobocik RS Iron deficiency anemia is not a rare problem among women of  
24 608 reproductive ages in Ethiopia: a community based cross sectional study. *BMC Blood Disord*  
25 609 2009; 9:7.  
26 610 18. Haidar J Prevalence of Anaemia, Deficiencies of Iron and Folic Acid and Their Determinants  
27 611 in Ethiopian Women. *Journal of Health, Population, and Nutrition* 2010; 28(4):359-68.  
28 612 19. Umata M, Haidar J, Demissie T, et al. Iron Deficiency Anaemia among Women of  
29 613 Reproductive Age in Nine Administrative Regions of Ethiopia. *EthiopJHealth Dev* 2008;  
30 614 22(3):252-8.  
31 615 20. Pokropek C, Sobolewski P, Getachew R, et al. Dietary intake patterns and insulin resistance  
32 616 in women with a history of gestational diabetes in the National Health and Nutrition  
33 617 Examination Survey (NHANES) 2000-2010. *American Journal of Obstetrics and Gynecology*  
34 618 2015; 1):S308.  
35 619 21. WHO Assessing iron status of populations: report of a joint WHO/ CDC technical  
36 620 consultation on the assessment of iron status at the population level, 2nd ed., Geneva,  
37 621 WHO. Available at  
38 622 [http://www.who.int/nutrition/publications/micronutrients/anaemia\\_iron\\_deficiency/97892](http://www.who.int/nutrition/publications/micronutrients/anaemia_iron_deficiency/97892)  
39 623 [41596107.pdf](http://www.who.int/nutrition/publications/micronutrients/anaemia_iron_deficiency/97892). 2007.  
40 624 22. Dreyfus ML, Stoltzfus RJ, Shrestha JB, et al. Hookworms, Malaria and Vitamin A Deficiency  
41 625 Contribute to Anemia and Iron Deficiency among Pregnant Women in the Plains of Nepal. *J*  
42 626 *Nutr* 2000; 130:2527–36.  
43 627 23. Brooker S, Hotez PJ, Bundy DA Hookworm-related anaemia among pregnant women: a  
44 628 systematic review. *PLoS Negl Trop Dis* 2008; 2(9):e291.  
45 629 24. Balarajan Y, Ramakrishnan U, Özaltin E, et al. Anaemia in low-income and middle-income  
46 630 countries. *The Lancet* 2011; 378(9809):2123-35.  
47 631 25. Petry N, Olofin I, Hurrell RF, et al. The Proportion of Anemia Associated with Iron Deficiency  
48 632 in Low, Medium, and High Human Development Index Countries: A Systematic Analysis of  
49 633 National Surveys. *Nutrients* 2016; 8(11).  
50 634 26. Gebre A, Mulugeta A Prevalence of Anemia and Associated Factors among Pregnant  
51 635 Women in North Western Zone of Tigray, Northern Ethiopia: A Cross-Sectional Study. *J Nutr*  
52 636 *Metab* 2015; 2015:165430.  
53  
54  
55  
56  
57  
58  
59  
60

- 1  
2  
3 637 27. Kefiyalew F, Zemene E, Asres Y, et al. Anemia among pregnant women in Southeast Ethiopia: prevalence, severity and associated risk factors. *BMC Research Notes* 2014; 7(771).  
4 638  
5 639 28. Rezende LF, Eluf-Neto J Population attributable fraction: planning of diseases prevention  
6 640 actions in Brazil. *Rev Saude Publica* 2016; 50.  
7 641 29. Bates I, McKew S, Sarkinfada F Anaemia: A useful indicator of neglected disease burden and  
8 642 control. *PLoS Med* 2007; 4(8):e231. doi:10.1371/journal.pmed.0040231.  
9 643 30. Lawson AB. *Statistical Methods in Spatial Epidemiology*. Atrium, Southern Gate, West  
10 644 Sussex, England: John Wiley & Sons Inc; 2006.  
11 645 31. Anselin L *Exploring Spatial Data with GeoDaTM : A Workbook*. Center for Spatially  
12 646 Integrated Social Science <http://www.wcsiss.org/> 2005.  
13 647 32. Banerjee S *Spatial Data Analysis*. *Annu Rev Public Health* 2016; 37:47-60.  
14 648 33. Ord J, Getis A Local Spatial Autocorrelation Statistics: Distributional Issues and an  
15 649 Application. *Geographical Analysis* 1995; 27(4):286–306.  
16 650 34. Merlo J, Chaix B, Ohlsson H, et al. A brief conceptual tutorial of multilevel analysis in social  
17 651 epidemiology: using measures of clustering in multilevel logistic regression to investigate  
18 652 contextual phenomena. *J Epidemiol Community Health* 2006; 60(4):290-7.  
19 653 35. Merlo J, Yang M, Chaix B, et al. A brief conceptual tutorial on multilevel analysis in social  
20 654 epidemiology: investigating contextual phenomena in different groups of people. *J*  
21 655 *Epidemiol Community Health* 2005; 59(9):729-36.  
22 656 36. Larsen K, Merlo J Appropriate assessment of neighborhood effects on individual health:  
23 657 integrating random and fixed effects in multilevel logistic regression. *Am J Epidemiol* 2005;  
24 658 161(1):81-8.  
25 659 37. Guo G, Zhao H Multilevel Modeling for Binary Data. *Annual Review Sociology*. *Annual*  
26 660 *Review Sociology* 2000; 26:441–62.  
27 661 38. International food policy research Institute (IFPRI) and Central Statistical agency (CSA)  
28 662 Population & Housing Census Atlas of Ethiopia 2007, Addis Ababa, Ethiopia. 2010.  
29 663 39. Ethiopian Public Health Institute Food Consumption Survey. *Ethiopian Food Consumption*  
30 664 *Survey Report*, Addis Ababa, Ethiopia 2013.  
31 665 40. Berhane G, Paulos Z, Tafere K, et al. Foodgrain Consumption and Calorie Intake Patterns in  
32 666 Ethiopia, Ethiopia Strategy Support Program II (ESSP II). Working Paper No 23 2011.  
33 667 41. Ministry of Health of Ethiopia Health and Health Related Indicator, Version 1, Addis Ababa,  
34 668 Ethiopia. 2008.  
35 669 42. Chaya N Poor Access to Health Services: Ways Ethiopia is Overcoming Research Commentary  
36 670 2007; 2(2).  
37 671 43. Mara D, Lane J, Scott B, et al. Sanitation and Health. *PLoS Med* 7(11): e1000363  
38 672 doi:10.1371/journal.pmed1000363 2010.  
39 673 44. Tay SCK, Nani EA, Walana W Parasitic infections and maternal anaemia among expectant  
40 674 mothers in the Dangme East District of Ghana.  
41 675 45. Alaofè H, Burney J, Naylor R, et al. Prevalence of anaemia, deficiencies of iron and vitamin A  
42 676 and their determinants in rural women and young children: a cross-sectional study in Kalalé  
43 677 district of northern Benin. *Public Health Nutrition*: 20(7), 1203–1213  
44 678 doi:10.1017/S1368980016003608 2017.  
45 679 46. Sadeghian M, Fatourehchi A, Lesanpezeski M, et al. Prevalence of Anemia and Correlated  
46 680 Factors in the Reproductive Age Women in Rural Areas of Tabas. *J Fam Repr Health* 2013;  
47 681 7(3).  
48 682 47. Lover AA, Hartman M, Chia KS, et al. Demographic and Spatial Predictors of Anemia in  
49 683 Women of Reproductive Age in Timor-Leste: Implications for Health Program Prioritization.  
50 684 *PLoS ONE* 9(3): e91252 doi:10.1371/journal.pone0091252.  
51 685 48. K CG, K SK A cross-sectional study of anemia among women of reproductive age group (15-  
52 686 49 years) in a rural population of Tamil Nadu. *Int J Med Sci and PH* 2017; 6(3).  
53  
54  
55  
56  
57  
58  
59  
60



- 1  
2  
3 687 49. Balarajan YS, Fawzi WW, Subramanian SV Changing patterns of social inequalities in  
4 688 anaemia among women in India: cross-sectional study using nationally representative data.  
5 689 BMJ Open 2013; 3:e002233. doi:10.1136/bmjopen-2012002233.  
6  
7 690 50. Rammohan A, Awofeso N, Robitaille M-C Addressing Female Iron-Deficiency Anaemia in  
8 691 India: Is Vegetarianism the Major Obstacle? ISRN Public Health 2012; 2012:1-8.  
9 692 51. Lenz A, Olinto MTA, Dias-da-Costa JS, et al. Socioeconomic, demographic and lifestyle  
10 693 factors associated with dietary patterns of women living in Southern Brazil. Cad Saúde  
11 694 Pública, Rio de Janeiro 2009; 25(6):1297-306.  
12 695 52. USAID/ENGINE Maternal Diet and Nutrition Practices and Their Determinants: A report on  
13 696 formative research findings 2014.  
14 697 53. Desalegn K, Pragya S, Debebe M, et al. Nutritional Status and Associated Factors among  
15 698 Pregnant Women in Wondo Genet District, Southern Ethiopia. Journal of Food Science and  
16 699 Engineering 2015; 5(2).  
17 700 54. Siddiqui MZ, Goli S, Reja T, et al. Prevalence of Anemia and Its Determinants Among  
18 701 Pregnant, Lactating, and Nonpregnant Nonlactating Women in India. SAGE Open 2017:1 –10  
19 702 DOI: .1177/2158244017725555.  
20 703 55. Soofi S, Khan GN, Sadiq K, et al. Prevalence and possible factors associated with anaemia,  
21 704 and vitamin B12 and folate deficiencies in women of reproductive age in Pakistan: analysis  
22 705 of national-level secondary survey data. BMJ Open 2017;7:e018007 doi:101136/ bmjopen-  
23 706 2017-018007.  
24 707 56. Habib MA, Soofi SB, Ahmed I, et al. Prevalence and determinants of iron deficiency anemia  
25 708 among non-pregnant women of reproductive age in Pakistan. Asia Pac J Clin Nutr  
26 709 2018;27(1):195-203.  
27 710 57. BH R, Patil PS, Joseph J Multigravidity a Major Risk Factor of Anaemia in Pregnancy and its  
28 711 Comparison in Primigravida Women in Raichur. National J Lab Med 2017; 6(4):PO22-PO7.  
29 712 58. Al-Farsi YM, Brooks DR, Werler MM, et al. Effect of high parity on occurrence of anemia in  
30 713 pregnancy: a cohort study. BMC Pregnancy and Childbirth 2011; 11(7  
31 714 ):<http://www.biomedcentral.com/1471-2393/11/7>.  
32 715 59. Kokici M, Harxhi A, Como N, et al. Haematological changes in HIV infection. Int J Ecosyst  
33 716 and Ecol Sci 2016; 6 (1):19-24  
34 717 60. Beyene A, Hailu T, Faris K, et al. Current state and trends of access to sanitation in Ethiopia  
35 718 and the need to revise indicators to monitor progress in the Post-2015 era. BMC Public  
36 719 Health (2015) 15:451 DOI 101186/s12889-015-1804-4.  
37 720 61. Freeman MC, Garn JV, Sclar GD, et al. The impact of sanitation on infectious diseases and  
38 721 nutritional status: Systematic Review and meta analysis. Int J Hygn & Evt Health 2017;  
39 722 220:928-49.  
40  
41  
42  
43  
44 723  
45  
46  
47  
48  
49  
50  
51  
52  
53  
54  
55  
56  
57  
58  
59  
60

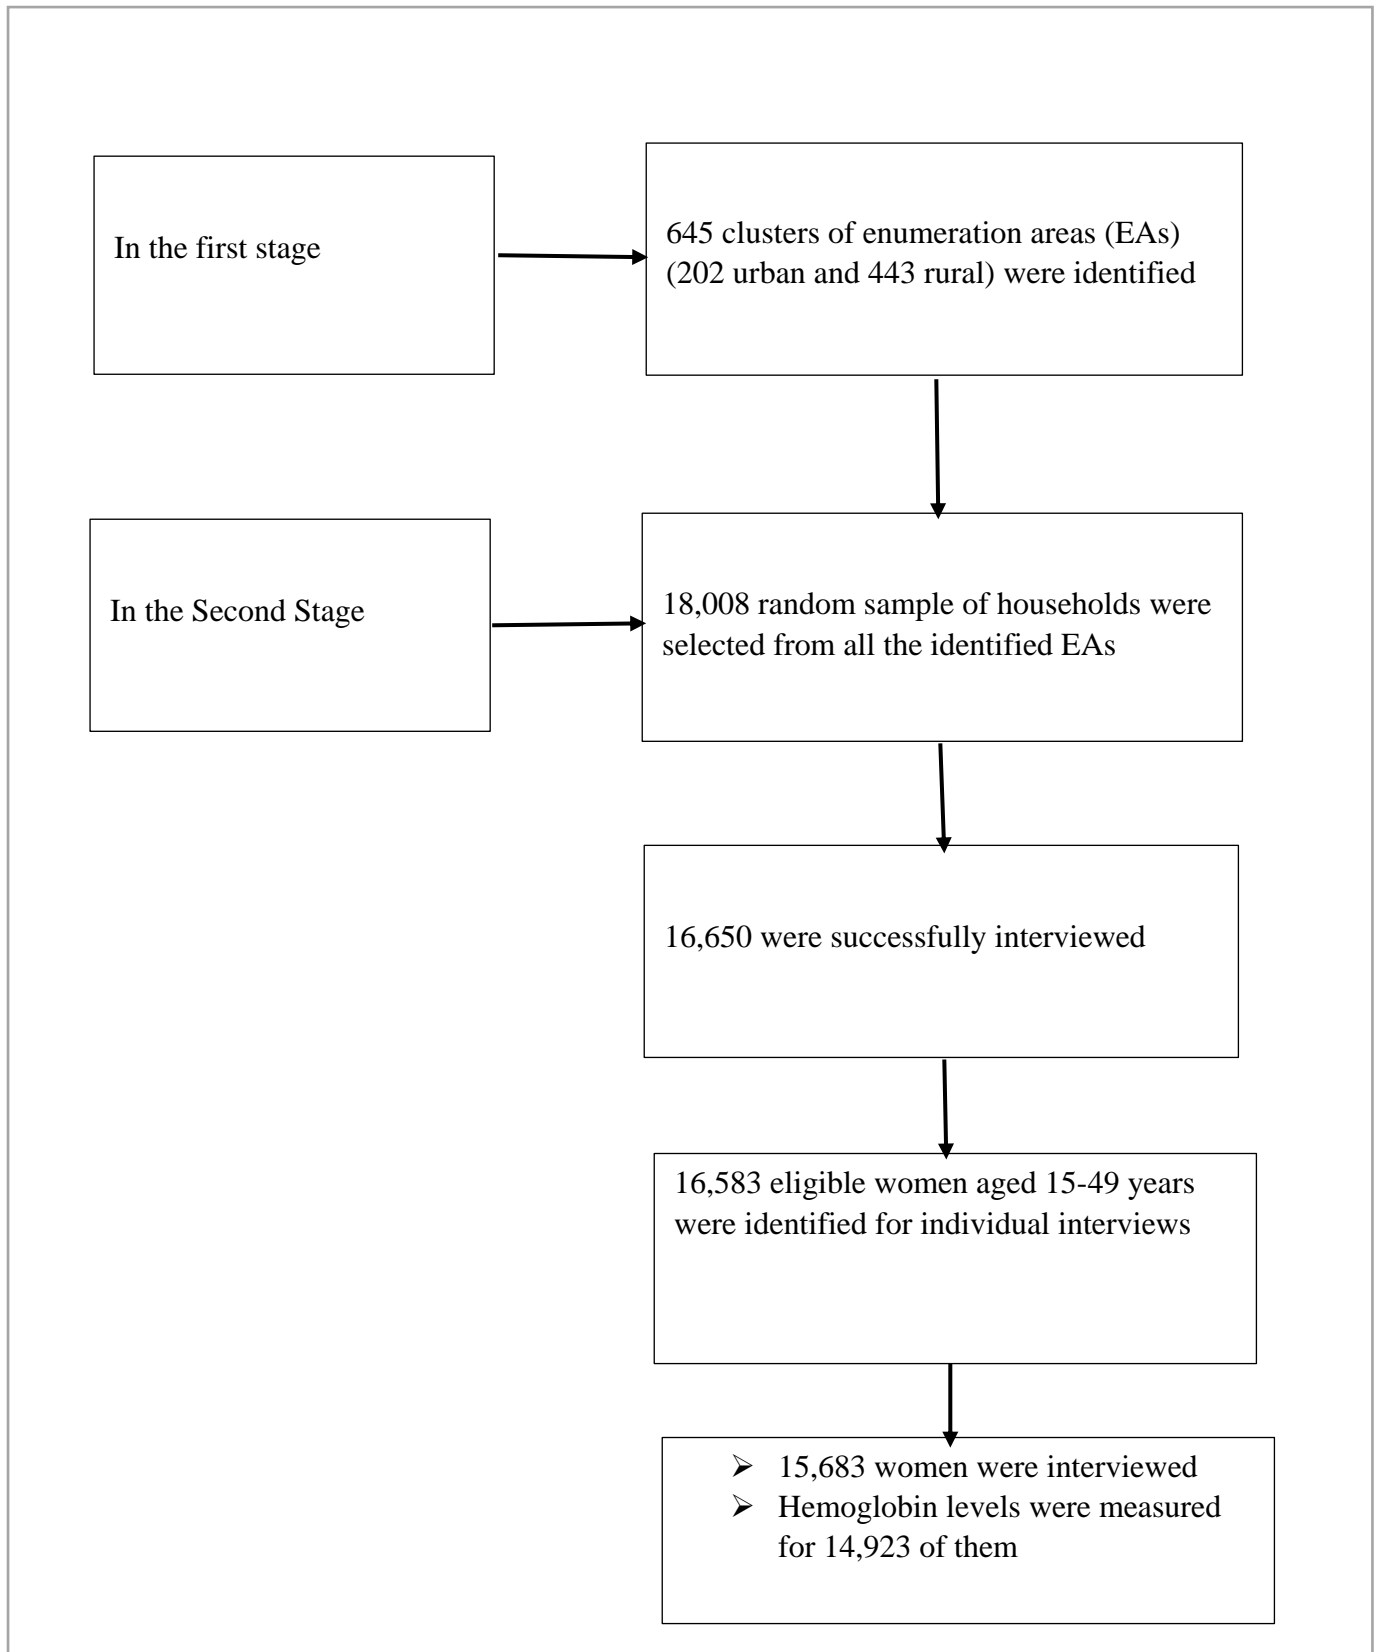

Figure 1: Selection of sample in the 2016 EDH Survey

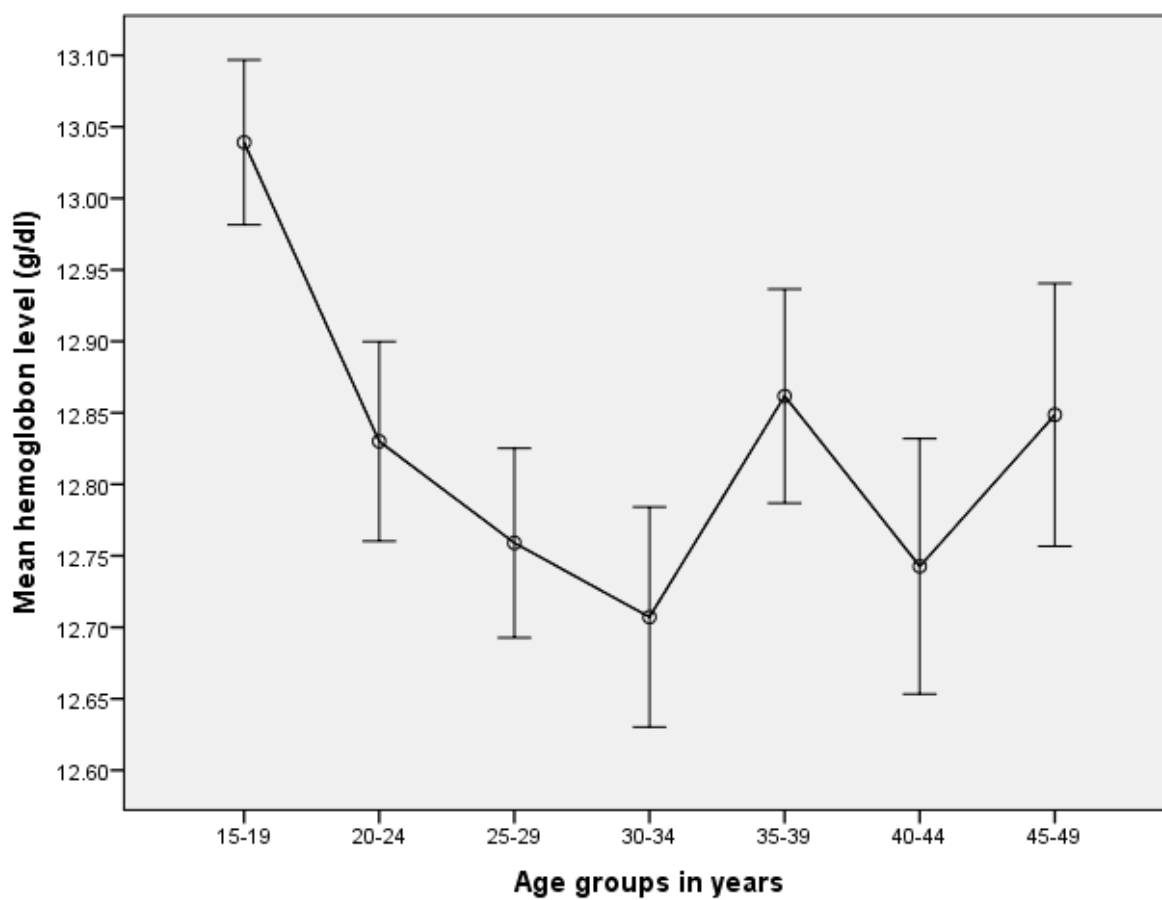

Figure 2: Average hemoglobin value with 95% CI for women of reproductive age at different age groups, Ethiopia, 2016

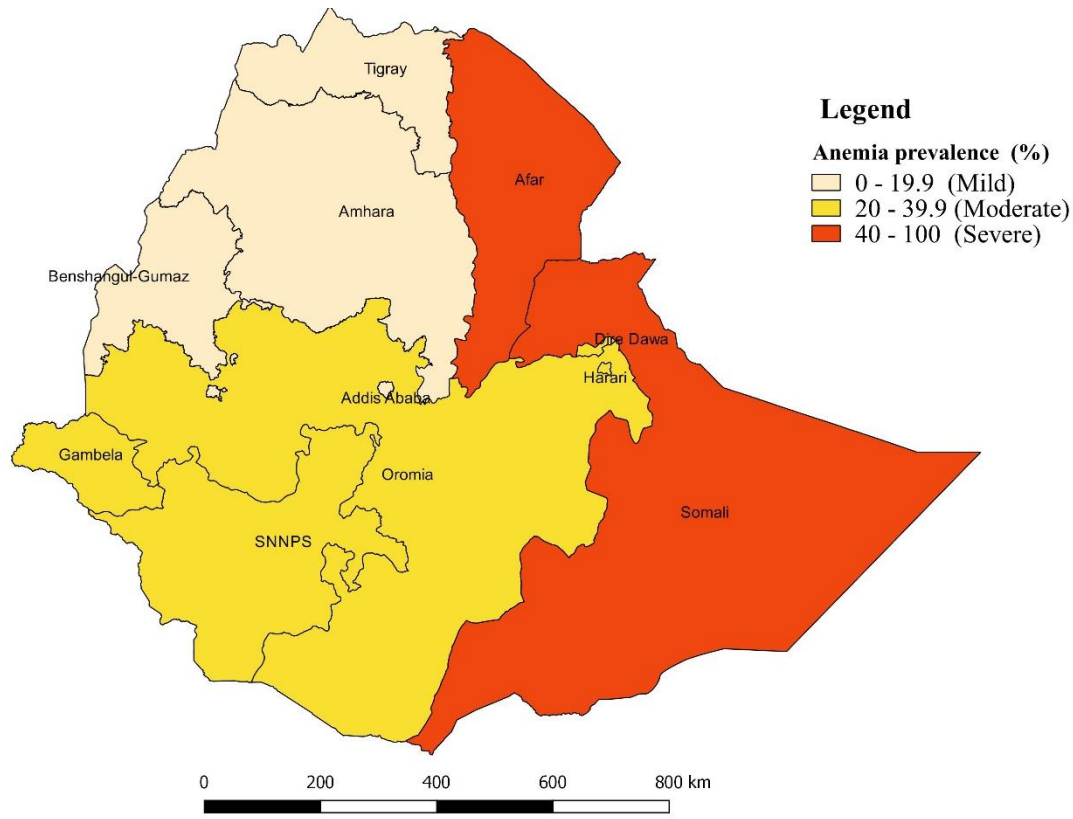

Figure 3. Spatial Empirical Bayesian smoothed (SEBS) percentage of anemia among women of reproductive age across regions, EDHS 2016

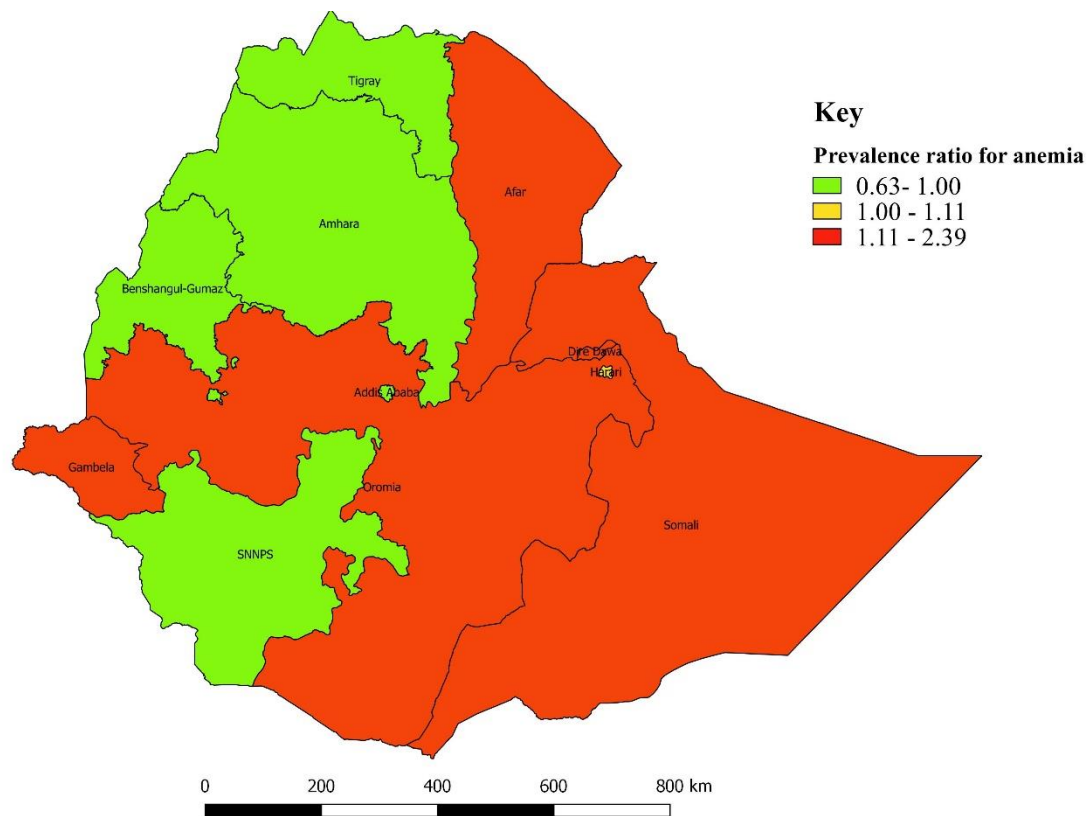

Figure 4. Standardized prevalence ratio for anemia among women of reproductive age across the regions in Ethiopia (standardized to national prevalence of 23.6%), EDHS 2016

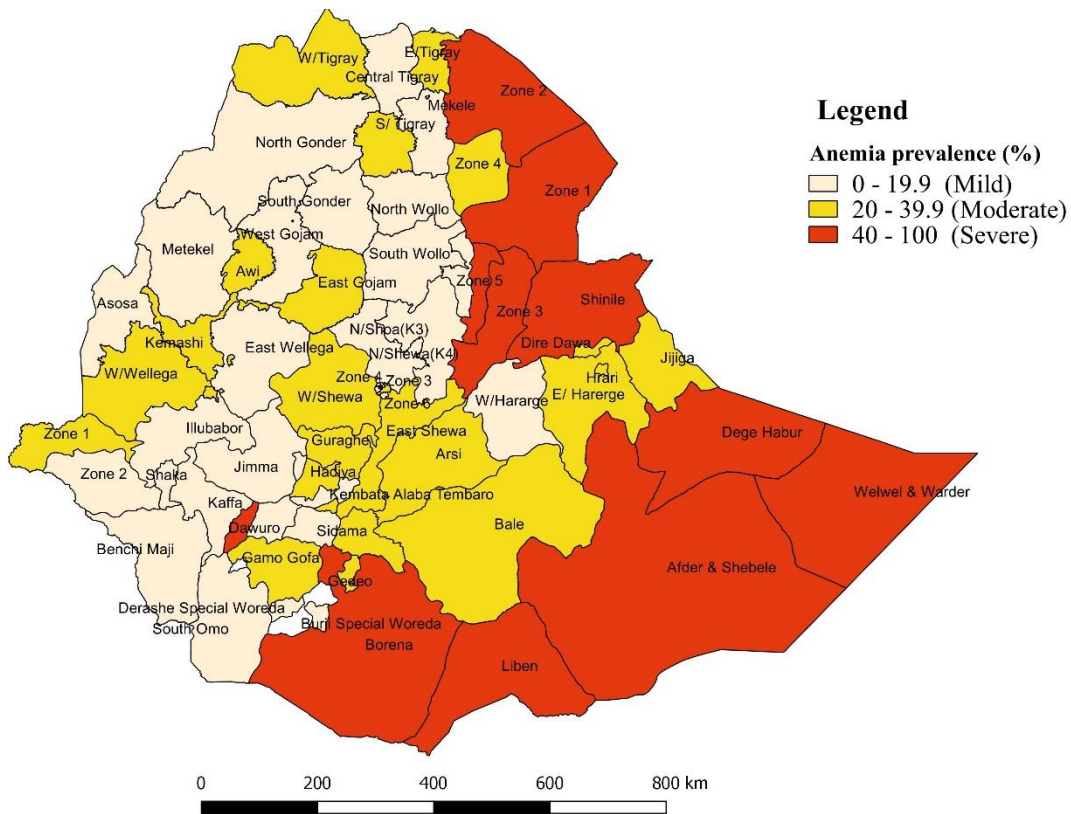

Figure 5. Spatial Empirical Bayesian smoothed (SEBS) percentage of anemia among women of reproductive age across Zones, EDHS 2016



Figure 6. Standardized prevalence ratio for anemia among women of reproductive age across Zones in Ethiopia (standardized to national prevalence of 23.6%), EDHS 2016

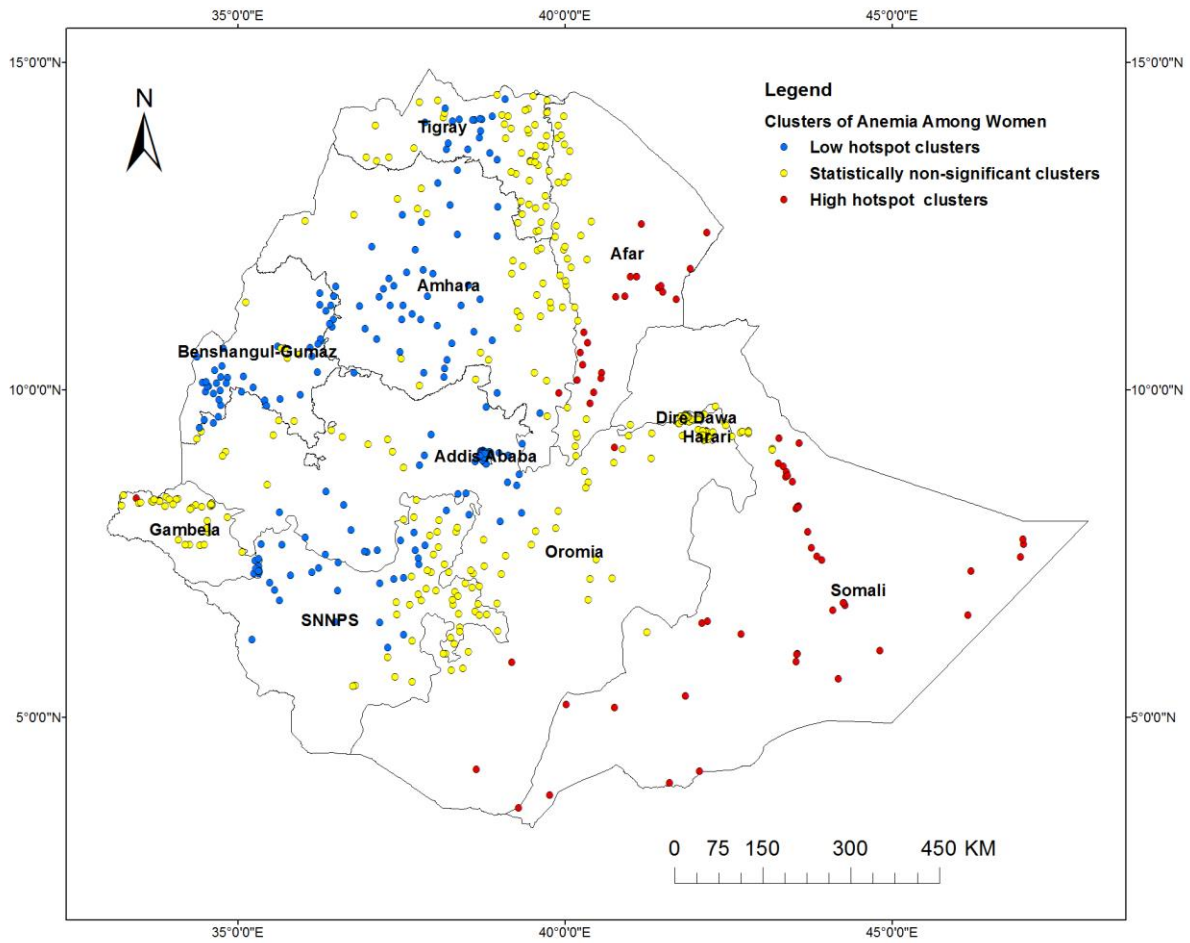

Figure 7. Spatial pattern of hotspots and cold spots of anemia rate among women of reproductive age at cluster level in Ethiopia, EDHS, 2016



Table 1 Variables identified for this study with coding

| Variable                                                                                                                  | Categories                                                                                                                                                                                                                            |
|---------------------------------------------------------------------------------------------------------------------------|---------------------------------------------------------------------------------------------------------------------------------------------------------------------------------------------------------------------------------------|
| Age (Age in 5-year groups)                                                                                                | 1=15-19; 2=20-29; 3=30-39; 4=40-49                                                                                                                                                                                                    |
| Region                                                                                                                    | 1=Tigray; 2=Afar; 3=Amhara; 4= Oromia; 5=Somali;<br>6=Benishangul-Gumuz; 7=SNNNP; 8=Gambella; 9=Harari;<br>10=Addis Ababa; 11=Dire Dawa                                                                                               |
| Area of residence                                                                                                         | 1=Urban; 2=Rural                                                                                                                                                                                                                      |
| Education level                                                                                                           | 1=No Education; 2= Primary; 3=Secondary; 4=Higher                                                                                                                                                                                     |
| Source of drinking water                                                                                                  | 1=piped water; 2=other improved (public taps, standpipes, tube wells, boreholes, protected dug wells and springs, and rainwater, bottled water); 3=unimproved (river, pond, unprotected spring and well)                              |
| Type of toilet facility                                                                                                   | 1= Improved (flush/pour flush toilets to piped sewer systems, septic tanks, and pit latrines; ventilated improved pit (VIP) latrines; pit latrines with slabs; and composting toilets);<br>2=Unimproved; 3=Open defecation; 4= Others |
| Religion                                                                                                                  | 1=Orthodox; 2=Protestant; 3=Muslim; 4= Others (Catholic, traditional, other)                                                                                                                                                          |
| Ethnicity                                                                                                                 | 1=Amhara; 2= Oromo; 3= Tigray; 4= Somali; 5= Sidama;<br>6=Gurage; 7=Welayta; 8=Hadya; 9=Other                                                                                                                                         |
| Wealth index                                                                                                              | 1=Poorest; 2=Poorer; 3=Middle; 4=Richer; 5=Richest                                                                                                                                                                                    |
| Preceding birth interval (months) (for index child- for youngest child) except the first birth, no interval for 1st birth | 1= <24 Months; 2= ≥24 Months                                                                                                                                                                                                          |
| Total children ever born                                                                                                  | 1=0; 2= 1-3; 3= 4+                                                                                                                                                                                                                    |
| Births in past year (number of births in the 12 months (not 0 to 11) prior to the month of interview)                     | 1= 0; 2= 1-2                                                                                                                                                                                                                          |
| Currently pregnant                                                                                                        | 0=No or unsure; 1=Yes                                                                                                                                                                                                                 |

| Variable                                                                                                                     | Categories                                                                                                                                                                                                                            |
|------------------------------------------------------------------------------------------------------------------------------|---------------------------------------------------------------------------------------------------------------------------------------------------------------------------------------------------------------------------------------|
| Age (Age in 5-year groups)                                                                                                   | 1=15-19; 2=20-29; 3=30-39; 4=40-49                                                                                                                                                                                                    |
| Region                                                                                                                       | 1=Tigray; 2=Afar; 3=Amhara; 4= Oromia; 5=Somali;<br>6=Benishangul-Gumuz; 7=SNNNP; 8=Gambella; 9=Harari;<br>10=Addis Ababa; 11=Dire Dawa                                                                                               |
| Place of residence                                                                                                           | 1=Urban; 2=Rural                                                                                                                                                                                                                      |
| Education level                                                                                                              | 1=No Education; 2= Primary; 3=Secondary; 4=Higher                                                                                                                                                                                     |
| Source of drinking water                                                                                                     | 1=piped water; 2=other improved (public taps, standpipes, tube wells, boreholes, protected dug wells and springs, and rainwater, bottled water); 3=unimproved (river, pond, unprotected spring and well)                              |
| Type of toilet facility                                                                                                      | 1= Improved (flush/pour flush toilets to piped sewer systems, septic tanks, and pit latrines; ventilated improved pit (VIP) latrines; pit latrines with slabs; and composting toilets);<br>2=Unimproved; 3=Open defecation; 4= Others |
| Religion                                                                                                                     | 1=Orthodox; 2=Protestant; 3=Muslim; 4= Others (Catholic, traditional, other)                                                                                                                                                          |
| Ethnicity                                                                                                                    | 1=Amhara; 2= Oromo; 3= Tigray; 4= Somali; 5= Sidama;<br>6=Gurage; 7=Welayta; 8=Hadya; 9=Other                                                                                                                                         |
| Wealth index                                                                                                                 | 1=Poorest; 2=Poorer; 3=Middle; 4=Richer; 5=Richest                                                                                                                                                                                    |
| Preceding birth interval (months)<br>(for index child- for youngest child) except the first birth, no interval for 1st birth | 1= <24 Months; 2= ≥24 Months                                                                                                                                                                                                          |
| Total children ever born                                                                                                     | 1=0; 2= 1-3; 3= 4+                                                                                                                                                                                                                    |
| Births in past year (number of births in the 12 months (not 0 to 11) prior to the month of interview)                        | 1= 0; 2= 1-2                                                                                                                                                                                                                          |
| Currently pregnant                                                                                                           | 0=No or unsure; 1=Yes                                                                                                                                                                                                                 |

|                                                                                |                                                                                          |
|--------------------------------------------------------------------------------|------------------------------------------------------------------------------------------|
| Births in the last three years (0 to 35 prior to the month of interview)       | 1= Yes; 2= No                                                                            |
| Current contraceptive use                                                      | 1= Yes; 2 = No                                                                           |
| Hemoglobin level adjusted for altitude and smoking (g/dl - 1 decimal)          | (g/dl - 1 decimal)                                                                       |
| Anemia                                                                         | 1=Anemic (Severe (<7 g/dl), Moderate (7-9.9 g/dl), Mild 10-10.9/11.9 g/dl); 2=Non-Anemic |
| BMI                                                                            | 1=<18.5; 2=18.5-24.9;3=>=25                                                              |
| Smoking                                                                        | 1=Yes; 2=No                                                                              |
| Current marital status                                                         | 1=Single; 2=Married/Living with partner;<br>3=Divorced/Widowed/Separated                 |
| During pregnancy, given or bought iron tablets/syrup for most recent pregnancy | 0=No; 1=Yes; 3= I Don't Know                                                             |
| Currently breastfeeding                                                        | 0=No; 1=Yes                                                                              |
| HIV test                                                                       | 1= Positive 2 = Negative                                                                 |

STROBE Statement—Checklist of items that should be included in reports of *cross-sectional studies*

Title: The Spatial Distribution and Determinant Factors of Anemia among Women of Reproductive Age in Ethiopia: A Multilevel and Spatial Analysis

|                              | Item No | Recommendation                                                                                                                                                                                    | Page numbers |
|------------------------------|---------|---------------------------------------------------------------------------------------------------------------------------------------------------------------------------------------------------|--------------|
| <b>Title and abstract</b>    | 1       | (a) Indicate the study's design with a commonly used term in the title or the abstract                                                                                                            | 1            |
|                              |         | (b) Provide in the abstract an informative and balanced summary of what was done and what was found                                                                                               | 2            |
| <b>Introduction</b>          |         |                                                                                                                                                                                                   |              |
| Background/rationale         | 2       | Explain the scientific background and rationale for the investigation being reported                                                                                                              | 3            |
| Objectives                   | 3       | State specific objectives, including any prespecified hypotheses                                                                                                                                  | 4            |
| <b>Methods</b>               |         |                                                                                                                                                                                                   |              |
| Study design                 | 4       | Present key elements of study design early in the paper                                                                                                                                           | 4            |
| Setting                      | 5       | Describe the setting, locations, and relevant dates, including periods of recruitment, exposure, follow-up, and data collection                                                                   | 4            |
| Participants                 | 6       | (a) Give the eligibility criteria, and the sources and methods of selection of participants                                                                                                       | 4,5          |
| Variables                    | 7       | Clearly define all outcomes, exposures, predictors, potential confounders, and effect modifiers. Give diagnostic criteria, if applicable                                                          | 5            |
| Data sources/<br>measurement | 8*      | For each variable of interest, give sources of data and details of methods of assessment (measurement). Describe comparability of assessment methods if there is more than one group              | 5            |
| Bias                         | 9       | Describe any efforts to address potential sources of bias                                                                                                                                         | 7            |
| Study size                   | 10      | Explain how the study size was arrived at                                                                                                                                                         | 5            |
| Quantitative variables       | 11      | Explain how quantitative variables were handled in the analyses. If applicable, describe which groupings were chosen and why                                                                      | 7            |
| Statistical methods          | 12      | (a) Describe all statistical methods, including those used to control for confounding                                                                                                             | 7,8          |
|                              |         | (b) Describe any methods used to examine subgroups and interactions                                                                                                                               | 8            |
|                              |         | (c) Explain how missing data were addressed                                                                                                                                                       | 7            |
|                              |         | (d) If applicable, describe analytical methods taking account of sampling strategy                                                                                                                | 8            |
|                              |         | (e) Describe any sensitivity analyses                                                                                                                                                             | 7            |
| <b>Results</b>               |         |                                                                                                                                                                                                   |              |
| Participants                 | 13*     | (a) Report numbers of individuals at each stage of study—eg numbers potentially eligible, examined for eligibility, confirmed eligible, included in the study, completing follow-up, and analysed | 9            |
|                              |         | (b) Give reasons for non-participation at each stage                                                                                                                                              | 9            |
|                              |         | (c) Consider use of a flow diagram                                                                                                                                                                | 9            |
| Descriptive data             | 14*     | (a) Give characteristics of study participants (eg demographic, clinical, social) and information on exposures and potential confounders                                                          | 9            |
|                              |         | (b) Indicate number of participants with missing data for each variable of interest                                                                                                               | 9            |

|                          |     |                                                                                                                                                                                                                                                                                                                                                                                                               |             |
|--------------------------|-----|---------------------------------------------------------------------------------------------------------------------------------------------------------------------------------------------------------------------------------------------------------------------------------------------------------------------------------------------------------------------------------------------------------------|-------------|
| Outcome data             | 15* | Report numbers of outcome events or summary measures                                                                                                                                                                                                                                                                                                                                                          | 9,10,11,12  |
| Main results             | 16  | (a) Give unadjusted estimates and, if applicable, confounder-adjusted estimates and their precision (eg, 95% confidence interval). Make clear which confounders were adjusted for and why they were included<br>(b) Report category boundaries when continuous variables were categorized<br>(c) If relevant, consider translating estimates of relative risk into absolute risk for a meaningful time period | 15,16,17,18 |
| Other analyses           | 17  | Report other analyses done—eg analyses of subgroups and interactions, and sensitivity analyses                                                                                                                                                                                                                                                                                                                |             |
| <b>Discussion</b>        |     |                                                                                                                                                                                                                                                                                                                                                                                                               |             |
| Key results              | 18  | Summarise key results with reference to study objectives                                                                                                                                                                                                                                                                                                                                                      | 21          |
| Limitations              | 19  | Discuss limitations of the study, taking into account sources of potential bias or imprecision. Discuss both direction and magnitude of any potential bias                                                                                                                                                                                                                                                    | 24          |
| Interpretation           | 20  | Give a cautious overall interpretation of results considering objectives, limitations, multiplicity of analyses, results from similar studies, and other relevant evidence                                                                                                                                                                                                                                    | 24          |
| Generalisability         | 21  | Discuss the generalisability (external validity) of the study results                                                                                                                                                                                                                                                                                                                                         | 22,23       |
| <b>Other information</b> |     |                                                                                                                                                                                                                                                                                                                                                                                                               |             |
| Funding                  | 22  | Give the source of funding and the role of the funders for the present study and, if applicable, for the original study on which the present article is based                                                                                                                                                                                                                                                 | 25          |

\*Give information separately for exposed and unexposed groups.

**Note:** An Explanation and Elaboration article discusses each checklist item and gives methodological background and published examples of transparent reporting. The STROBE checklist is best used in conjunction with this article (freely available on the Web sites of PLoS Medicine at <http://www.plosmedicine.org/>, Annals of Internal Medicine at <http://www.annals.org/>, and Epidemiology at <http://www.epidem.com/>). Information on the STROBE Initiative is available at [www.strobe-statement.org](http://www.strobe-statement.org).
