# Supplementary material for: Spatial distribution and determinant factors of anaemia among women of reproductive age in Ethiopia: a multilevel and spatial analysis
Source: PubMed Central journal article supplement — BMJ Open. 2019 Apr 4;9(4):e027276. doi: 10.1136/bmjopen-2018-027276 (PMC6500301; doi:10.1136/bmjopen-2018-027276), 2019-04-04
Supplement: bmjopen-2018-027276supp001.pdf [file bmjopen-2018-027276supp001.pdf]

Table 1 Variables identified for this study with coding

| Variable                                                                                                                  | Categories                                                                                                                                                                                                                            |
|---------------------------------------------------------------------------------------------------------------------------|---------------------------------------------------------------------------------------------------------------------------------------------------------------------------------------------------------------------------------------|
| Age (Age in 5-year groups)                                                                                                | 1=15-19; 2=20-29; 3=30-39; 4=40-49                                                                                                                                                                                                    |
| Region                                                                                                                    | 1=Tigray; 2=Afar; 3=Amhara; 4= Oromia; 5=Somali;<br>6=Benishangul-Gumuz; 7=SNNNP; 8=Gambella; 9=Harari;<br>10=Addis Ababa; 11=Dire Dawa                                                                                               |
| Area of residence                                                                                                         | 1=Urban; 2=Rural                                                                                                                                                                                                                      |
| Education level                                                                                                           | 1=No Education; 2= Primary; 3=Secondary; 4=Higher                                                                                                                                                                                     |
| Source of drinking water                                                                                                  | 1=piped water; 2=other improved (public taps, standpipes, tube wells, boreholes, protected dug wells and springs, and rainwater, bottled water); 3=unimproved (river, pond, unprotected spring and well)                              |
| Type of toilet facility                                                                                                   | 1= Improved (flush/pour flush toilets to piped sewer systems, septic tanks, and pit latrines; ventilated improved pit (VIP) latrines; pit latrines with slabs; and composting toilets);<br>2=Unimproved; 3=Open defecation; 4= Others |
| Religion                                                                                                                  | 1=Orthodox; 2=Protestant; 3=Muslim; 4= Others (Catholic, traditional, other)                                                                                                                                                          |
| Ethnicity                                                                                                                 | 1=Amhara; 2= Oromo; 3= Tigray; 4= Somali; 5= Sidama;<br>6=Gurage; 7=Welayta; 8=Hadya; 9=Other                                                                                                                                         |
| Wealth index                                                                                                              | 1=Poorest; 2=Poorer; 3=Middle; 4=Richer; 5=Richest                                                                                                                                                                                    |
| Preceding birth interval (months) (for index child- for youngest child) except the first birth, no interval for 1st birth | 1= <24 Months; 2= ≥24 Months                                                                                                                                                                                                          |
| Total children ever born                                                                                                  | 1=0; 2= 1-3; 3= 4+                                                                                                                                                                                                                    |
| Births in past year (number of births in the 12 months (not 0 to 11) prior to the month of interview)                     | 1= 0; 2= 1-2                                                                                                                                                                                                                          |
| Currently pregnant                                                                                                        | 0=No or unsure; 1=Yes                                                                                                                                                                                                                 |

| Variable                                                                                                                  | Categories                                                                                                                                                                                                                         |
|---------------------------------------------------------------------------------------------------------------------------|------------------------------------------------------------------------------------------------------------------------------------------------------------------------------------------------------------------------------------|
| Age (Age in 5-year groups)                                                                                                | 1=15-19; 2=20-29; 3=30-39; 4=40-49                                                                                                                                                                                                 |
| Region                                                                                                                    | 1=Tigray; 2=Afar; 3=Amhara; 4= Oromia; 5=Somali; 6=Benishangul-Gumuz; 7=SNNNP; 8=Gambella; 9=Harari; 10=Addis Ababa; 11=Dire Dawa                                                                                                  |
| Place of residence                                                                                                        | 1=Urban; 2=Rural                                                                                                                                                                                                                   |
| Education level                                                                                                           | 1=No Education; 2= Primary; 3=Secondary; 4=Higher                                                                                                                                                                                  |
| Source of drinking water                                                                                                  | 1=piped water; 2=other improved (public taps, standpipes, tube wells, boreholes, protected dug wells and springs, and rainwater, bottled water); 3=unimproved (river, pond, unprotected spring and well)                           |
| Type of toilet facility                                                                                                   | 1= Improved (flush/pour flush toilets to piped sewer systems, septic tanks, and pit latrines; ventilated improved pit (VIP) latrines; pit latrines with slabs; and composting toilets); 2=Unimproved; 3=Open defecation; 4= Others |
| Religion                                                                                                                  | 1=Orthodox; 2=Protestant; 3=Muslim; 4= Others (Catholic, traditional, other)                                                                                                                                                       |
| Ethnicity                                                                                                                 | 1=Amhara; 2= Oromo; 3= Tigray; 4= Somali; 5= Sidama; 6=Gurage; 7=Welayta; 8=Hadya; 9=Other                                                                                                                                         |
| Wealth index                                                                                                              | 1=Poorest; 2=Poorer; 3=Middle; 4=Richer; 5=Richest                                                                                                                                                                                 |
| Preceding birth interval (months) (for index child- for youngest child) except the first birth, no interval for 1st birth | 1= <24 Months; 2= ≥24 Months                                                                                                                                                                                                       |
| Total children ever born                                                                                                  | 1=0; 2= 1-3; 3= 4+                                                                                                                                                                                                                 |
| Births in past year (number of births in the 12 months (not 0 to 11) prior to the month of interview)                     | 1= 0; 2= 1-2                                                                                                                                                                                                                       |
| Currently pregnant                                                                                                        | 0=No or unsure; 1=Yes                                                                                                                                                                                                              |

|                                                                                |                                                                                          |
|--------------------------------------------------------------------------------|------------------------------------------------------------------------------------------|
| Births in the last three years (0 to 35 prior to the month of interview)       | 1= Yes; 2= No                                                                            |
| Current contraceptive use                                                      | 1= Yes; 2 = No                                                                           |
| Hemoglobin level adjusted for altitude and smoking (g/dl - 1 decimal)          | (g/dl - 1 decimal)                                                                       |
| Anemia                                                                         | 1=Anemic (Severe (<7 g/dl), Moderate (7-9.9 g/dl), Mild 10-10.9/11.9 g/dl); 2=Non-Anemic |
| BMI                                                                            | 1=<18.5; 2=18.5-24.9;3=>=25                                                              |
| Smoking                                                                        | 1=Yes; 2=No                                                                              |
| Current marital status                                                         | 1=Single; 2=Married/Living with partner;<br>3=Divorced/Widowed/Separated                 |
| During pregnancy, given or bought iron tablets/syrup for most recent pregnancy | 0=No; 1=Yes; 3= I Don't Know                                                             |
| Currently breastfeeding                                                        | 0=No; 1=Yes                                                                              |
| HIV test                                                                       | 1= Positive 2 = Negative                                                                 |
