# Supplementary material for: Spatial distribution and determinant factors of anaemia among women of reproductive age in Ethiopia: a multilevel and spatial analysis
Source: PubMed Central journal article supplement — BMJ Open. 2019 Apr 4;9(4):e027276. doi: 10.1136/bmjopen-2018-027276 (PMC6500301; doi:10.1136/bmjopen-2018-027276), 2019-04-04
Supplement: bmjopen-2018-027276supp002.pdf [file bmjopen-2018-027276supp002.pdf]

Table 2 The results of multicollinearity analysis (value of VIF and Tolerance.)

| Variable                               | VIF (variance inflation factor) | Tolerance =1/VIF |
|----------------------------------------|---------------------------------|------------------|
| Total children ever born               | 3.87                            | 0.258487         |
| Residence                              | 3.30                            | 0.303157         |
| Water source                           | 2.92                            | 0.342678         |
| Children born in the preceding 5 years | 2.77                            | 0.360676         |
| Wealth index                           | 2.61                            | 0.383088         |
| Age                                    | 2.58                            | 0.387219         |
| Currently breast feed                  | 2.34                            | 0.427727         |
| Toilet facility                        | 1.84                            | 0.544502         |
| Education status                       | 1.75                            | 0.571787         |
| Children born in last 1 year           | 1.68                            | 0.593812         |
| Marital status                         | 1.61                            | 0.621168         |
| Region                                 | 1.38                            | 0.723035         |
| Religion                               | 1.23                            | 0.814677         |
| Currently pregnant                     | 1.12                            | 0.889108         |
| HIV test                               | 1.05                            | 0.956804         |
| Current contraceptive use              | 1.00                            | 0.998772         |
